# Supplementary material for: New Biomarkers Based on Dendritic Cells for Breast Cancer Treatment and Prognosis Diagnosis
Source: Int J Mol Sci. 2023 Feb 17;24(4):4058. doi: 10.3390/ijms24044058 (PMC9963148; doi:10.3390/ijms24044058)
Supplement: Supplementary file 1 [file ijms-24-04058-s001.zip]

Archive with 6 entries (6 files):
- Supplementary Figure S1.png
- Supplementary Figure S2.png
- Supplementary Figure S3.png
- Supplementary Figures and Tables legends.pdf
- Supplementary Tables S1.csv
- Supplementary Tables S2.csv
