# Supplementary material for: New Biomarkers Based on Dendritic Cells for Breast Cancer Treatment and Prognosis Diagnosis
Source: Int J Mol Sci. 2023 Feb 17;24(4):4058. doi: 10.3390/ijms24044058 (PMC9963148; doi:10.3390/ijms24044058)
Supplement: Supplementary file 1 [file ijms-24-04058-s001.zip › Supplementary Tables S1.csv]

IC50 value ranking of pDChigh group
X	testTCGA.A1.A0SP.01	testTCGA.A8.A06X.01	testTCGA.A8.A09K.01	testTCGA.OL.A5RY.01	testTCGA.BH.A0DG.01	testTCGA.B6.A0I9.01	testTCGA.D8.A1X9.01	testTCGA.V7.A7HQ.01	testTCGA.D8.A1XK.01	testTCGA.A8.A07C.01	testTCGA.AR.A0U4.01	testTCGA.GM.A2DN.01	testTCGA.D8.A1JG.01	testTCGA.A2.A04Q.01	testTCGA.E9.A1NC.01	testTCGA.D8.A1JM.01	testTCGA.AQ.A54O.01	testTCGA.A2.A0SW.01	testTCGA.E2.A1B6.01	testTCGA.D8.A1XW.01	testTCGA.A7.A0DC.01	testTCGA.EW.A6SD.01	testTCGA.E2.A14Z.01	testTCGA.B6.A0RS.01	testTCGA.D8.A1JL.01	testTCGA.BH.A0DZ.01	testTCGA.5L.AAT1.01	testTCGA.S3.AA0Z.01	testTCGA.D8.A1J8.01	testTCGA.E9.A1ND.01	testTCGA.A2.A1G1.01	testTCGA.E2.A1LB.01	testTCGA.AQ.A04J.01	testTCGA.WT.AB44.01	testTCGA.AC.A3BB.01	testTCGA.AR.A1AX.01	testTCGA.D8.A27M.01	testTCGA.EW.A1IY.01	testTCGA.PE.A5DE.01	testTCGA.EW.A1J5.01	testTCGA.AO.A0JE.01	testTCGA.BH.A18V.01	testTCGA.BH.A0BF.01	testTCGA.A2.A0CL.01	testTCGA.BH.A6R8.01	testTCGA.A7.A0DB.01	testTCGA.AR.A0TQ.01	testTCGA.GM.A2DH.01	testTCGA.A8.A08P.01
Bortezomib_1191	0.004916916	0.009852318	0.010913946	0.007325355	0.014855828	0.014443202	0.015539609	0.015937528	0.005580773	0.004481621	0.005285839	0.008608424	0.007761078	0.004712256	0.006729254	0.007840028	0.011791731	0.008880204	0.003336683	0.005150582	0.013236653	0.008473019	0.007068601	0.00756046	0.00599887	0.009993746	0.008816358	0.003880632	0.011301053	0.004964016	0.005614592	0.010828451	0.005789062	0.015258477	0.009550307	0.005569565	0.007604234	0.01156004	0.006378538	0.00834487	0.009157185	0.003752418	0.005905701	0.005799036	0.010304273	0.025583409	0.017910757	0.007051347	0.008291397
Dactinomycin_1911	0.005254453	0.014964966	0.023730025	0.003278692	0.011275736	0.020854648	0.019969734	0.010643584	0.006395591	0.006056248	0.006436357	0.007692519	0.008522331	0.003136883	0.007458767	0.006280081	0.014929758	0.012990454	0.002805148	0.015627559	0.037955935	0.01048816	0.006655618	0.010210695	0.008114202	0.009738406	0.004211344	0.002860188	0.01605508	0.004469982	0.009815328	0.004256871	0.006481281	0.00512052	0.005803617	0.008184556	0.015463098	0.009052918	0.004905979	0.015900845	0.009310051	0.008904247	0.008931817	0.00512987	0.022499606	0.01285709	0.016495675	0.011044991	0.00922805
Docetaxel_1007	0.004303557	0.011866744	0.026886987	0.00398061	0.019687232	0.020204504	0.025058499	0.015902207	0.004586923	0.004729795	0.005917869	0.009725506	0.008810374	0.007001986	0.014149738	0.008734408	0.035697072	0.011985613	0.005806153	0.023783662	0.032593909	0.009911709	0.007256819	0.006965558	0.008753631	0.007097171	0.007247116	0.002949037	0.017943163	0.006933778	0.011283542	0.008981561	0.011005247	0.021612906	0.009853276	0.009940587	0.015761456	0.012135885	0.006791979	0.022905392	0.012825201	0.004820601	0.00968974	0.008069668	0.034585696	0.047891954	0.024173333	0.009310201	0.009656031
Daporinad_1248	0.009662246	0.010571404	0.006830897	0.008460448	0.014363714	0.00806095	0.019638212	0.031426015	0.003474365	0.002251561	0.013359688	0.007435144	0.063625638	0.014272656	0.010797088	0.0140757	0.019195996	0.0457366	0.003807026	0.006399469	0.004283768	0.021589615	0.00623997	0.009641658	0.008170147	0.008180332	0.007604812	0.001781639	0.036069588	0.051411258	0.009881184	0.019357092	0.005987648	0.043256042	0.012884586	0.008294264	0.017702145	0.009385928	0.008556184	0.007524122	0.019193128	0.005876556	0.007699535	0.004806247	0.093281339	0.004585147	0.024256671	0.003693724	0.01424049
Sepantronium.bromide_1941	0.010162246	0.011434193	0.01508815	0.025677059	0.023088403	0.011681358	0.010812951	0.018380432	0.004354274	0.008512048	0.018384809	0.018926194	0.018527435	0.01291952	0.013047859	0.016893307	0.013155119	0.012598065	0.010760114	0.013481658	0.011840727	0.019687055	0.011081271	0.017184432	0.016482221	0.020298797	0.011852682	0.023042422	0.007417486	0.008323714	0.009886328	0.022362478	0.019263118	0.010214625	0.015801582	0.028789728	0.02617962	0.014029017	0.009986908	0.013667275	0.047644303	0.0197943	0.014441414	0.014392944	0.005656421	0.014105587	0.008401639	0.00784762	0.014153636
Vinblastine_1004	0.005823711	0.023655939	0.022252265	0.007605408	0.027880833	0.057867323	0.063755177	0.065994704	0.009859789	0.005244704	0.008216305	0.019472465	0.027359152	0.01298597	0.058078645	0.021246196	0.09673626	0.040613045	0.006030041	0.075445528	0.040039318	0.030560036	0.015657794	0.030978607	0.017110635	0.016824281	0.009660464	0.003210709	0.059764229	0.036747747	0.016071935	0.017063571	0.022532893	0.092543637	0.020428001	0.015274235	0.03657572	0.019964523	0.015464789	0.034857301	0.043166129	0.013388623	0.016401986	0.009582583	0.125365637	0.039816336	0.036119597	0.01969535	0.013150749
Eg5_9814_1712	0.03731881	0.035179561	0.027569856	0.016734562	0.056680225	0.051176992	0.153200779	0.052633895	0.015331872	0.009782652	0.042278887	0.031107966	0.072502768	0.029597877	0.049413847	0.092868602	0.131879685	0.097594686	0.01830433	0.088231607	0.109220296	0.038223998	0.038981601	0.022040635	0.028948004	0.042044999	0.021530731	0.009649057	0.140948351	0.040980889	0.075967798	0.038287451	0.042271523	0.062972952	0.045262566	0.02306256	0.050206961	0.059448861	0.034147421	0.072120296	0.07649522	0.02747851	0.061326962	0.043563192	0.117825883	0.080396295	0.116030697	0.044012938	0.045354466
Staurosporine_1034	0.023368651	0.09986385	0.359234266	0.013274818	0.041131596	0.120825667	0.088391469	0.113131854	0.052182684	0.029489296	0.029569665	0.037053887	0.044195251	0.022260675	0.027746684	0.189047659	0.221231776	0.067155078	0.024243275	0.06671202	0.283913561	0.039328565	0.04318518	0.038201043	0.032246017	0.026608435	0.028424496	0.021966313	0.096213979	0.032121672	0.023622171	0.038710683	0.031954082	0.050340637	0.031931076	0.034354903	0.021460616	0.041564865	0.03447904	0.143765168	0.032513863	0.027269113	0.024654177	0.022382155	0.484208146	0.04345285	0.081201353	0.061826024	0.072928615
Vinorelbine_2048	0.01470578	0.071922389	0.127715517	0.011349012	0.075464631	0.138326197	0.203301512	0.066051224	0.019152524	0.014769534	0.024818037	0.035372104	0.042225033	0.0148022	0.070474889	0.048698614	0.131097203	0.072906897	0.009788175	0.253135712	0.290853464	0.043030611	0.025173747	0.02914159	0.046075508	0.027427433	0.018673744	0.00760157	0.154756166	0.025669111	0.046861677	0.034307275	0.044508497	0.059847795	0.031997834	0.026330497	0.075370051	0.076262895	0.022781792	0.124725089	0.090765369	0.036156616	0.031941861	0.021347824	0.199276274	0.184757298	0.098630761	0.038908839	0.042365272
Dinaciclib_1180	0.061169772	0.045897114	0.103713221	0.031391421	0.102938605	0.126320806	0.165060469	0.269092419	0.044561563	0.033233858	0.029892128	0.051447568	0.054752962	0.033105415	0.043478623	0.053447247	0.235579166	0.097519313	0.031418041	0.049182529	0.175701544	0.054478581	0.041769628	0.046791541	0.026787859	0.066986508	0.050776185	0.02429946	0.09114228	0.037004671	0.040111048	0.066193813	0.030025192	0.128277886	0.061767265	0.049524559	0.042939094	0.053822635	0.053925036	0.079593773	0.094321546	0.028925111	0.051534186	0.038415176	0.261803824	0.07792399	0.240171115	0.06857906	0.070928293
Dactinomycin_1811	0.089094146	0.098265013	0.150590435	0.041270206	0.113258442	0.100680231	0.159292645	0.128823552	0.045827294	0.06915316	0.079219279	0.057433774	0.110871953	0.051876366	0.1390482	0.113333212	0.156055339	0.135596425	0.037578987	0.194880277	0.200854429	0.08543	0.053516113	0.079643686	0.094299967	0.080601128	0.038086132	0.028643013	0.11460393	0.059611968	0.086401954	0.068527399	0.075239042	0.096116136	0.060082742	0.057630221	0.087356215	0.076108513	0.05813473	0.085599426	0.105240446	0.086682463	0.090260939	0.047514087	0.190742638	0.08548435	0.100068978	0.081571963	0.080487809
Paclitaxel_1080	0.021450359	0.076469004	0.169424423	0.02170243	0.158487155	0.128093576	0.23244893	0.208583918	0.01819589	0.016650819	0.027297593	0.05190715	0.037015996	0.035729795	0.131038082	0.075561954	0.244577293	0.092259977	0.021163325	0.14479824	0.115253802	0.035474768	0.034280143	0.026960338	0.051836024	0.072594384	0.029386701	0.008428494	0.144592776	0.055786097	0.042790534	0.069717564	0.072312478	0.113759605	0.059856197	0.044640761	0.120895077	0.090301168	0.03542647	0.111512778	0.084959403	0.018135732	0.041524518	0.034374457	0.274022604	0.132547658	0.2874393	0.024885652	0.041755823
CDK9_5038_1709	0.120003898	0.092677398	0.126714305	0.037552618	0.140978784	0.201887503	0.380910593	0.335522824	0.071896843	0.087984291	0.037175983	0.08186239	0.101357866	0.045118056	0.048343963	0.148169033	0.247924452	0.189633096	0.036980615	0.090547162	0.436371584	0.072728715	0.090188071	0.054535017	0.049932396	0.129405199	0.065202413	0.025133618	0.28381525	0.063464919	0.094414275	0.085714204	0.039564395	0.116450238	0.089471489	0.082977223	0.076427001	0.087453036	0.080689428	0.121693459	0.12563448	0.043819541	0.072202386	0.036927404	0.586688925	0.086753979	0.218065092	0.104510823	0.116064528
Camptothecin_1003	0.034544376	0.127680468	0.323597958	0.027801383	0.208463931	0.280148954	0.310249809	0.23867398	0.050577882	0.131441071	0.041229539	0.06258203	0.071081778	0.050731421	0.082041297	0.044604015	0.144003061	0.143893891	0.027441817	0.980907228	0.985930265	0.142196638	0.088149301	0.198225523	0.13239986	0.139931897	0.030740698	0.044635848	0.15364635	0.037740311	0.127154736	0.108654584	0.083947727	0.073381751	0.052810862	0.061365638	0.13112824	0.085834065	0.046741526	0.106214081	0.121789462	0.061562833	0.073521936	0.031009347	0.352978691	0.228625724	0.125295927	0.059416232	0.11826538
Luminespib_1559	0.066008167	0.105017557	0.218587036	0.034366707	0.125178982	0.122153971	0.283008326	0.107515533	0.076133379	0.045391289	0.058258354	0.055094583	0.084169236	0.068201073	0.089764555	0.640374093	0.258602431	0.129673376	0.034488415	0.297955402	0.376098493	0.054726737	0.057780277	0.108189537	0.107974174	0.040228073	0.051704179	0.0424488	0.146140468	0.115001693	0.089581384	0.059648483	0.071432292	0.070046343	0.068799703	0.07458419	0.134536736	0.144811877	0.067893626	0.189606572	0.072155759	0.105885474	0.092178264	0.051026819	0.407879282	0.154968108	0.111220518	0.078633791	0.1064088
Rapamycin_1084	0.190273786	0.146688339	0.312478025	0.042043754	0.164841351	0.223470236	0.245229947	0.123443419	0.256951299	0.14201745	0.135504422	0.107547604	0.075804949	0.057310326	0.171954828	0.304211544	0.117678126	0.062055797	0.047692351	0.319979522	0.469764635	0.065853037	0.066432124	0.055013076	0.19254079	0.183329957	0.071623547	0.104721971	0.169883164	0.084766405	0.304004674	0.037818731	0.141162057	0.072908823	0.086454198	0.102277813	0.199952891	0.131367761	0.087439339	0.161903836	0.075628377	0.204607801	0.086902732	0.067014741	0.145942051	0.167079178	0.183385773	0.101826401	0.113622518
MG.132_1862	0.130618092	0.23635833	0.267710045	0.193344483	0.293366058	0.309526016	0.307146552	0.268575228	0.153905671	0.13597538	0.183949252	0.193214869	0.213932484	0.150197487	0.176822196	0.232192305	0.249775044	0.226251771	0.115251096	0.170375693	0.276420224	0.221213991	0.172742951	0.220810459	0.185890735	0.220581913	0.200581737	0.141325796	0.226446177	0.150558388	0.139493333	0.296994362	0.180249217	0.275668339	0.225002409	0.166418242	0.223891042	0.256210545	0.174470275	0.255327848	0.218315549	0.154769574	0.155127514	0.157075813	0.265430004	0.269817851	0.373473675	0.174857601	0.240616257
Dactolisib_1057	0.191423608	0.481170264	1.194848129	0.074326976	0.211354897	0.24119176	0.698332635	0.189013729	0.408449623	0.278952999	0.2900761	0.161215218	0.143940397	0.110038098	0.33643074	0.443824538	0.209562277	0.105071844	0.128701706	0.370914833	0.54241189	0.175197263	0.095009088	0.158100088	0.603928527	0.160660972	0.084867048	0.115402177	0.175024747	0.277930139	0.307145291	0.066629138	0.300188614	0.093766213	0.095691565	0.146966251	0.355367882	0.162488004	0.097653016	0.402751735	0.122360633	0.442734944	0.131075528	0.122073019	0.30565021	0.228190014	0.426845141	0.220088433	0.192285617
Vincristine_1818	0.085564696	0.115187973	0.113951019	0.063345207	0.267632587	0.508266727	0.467388153	0.627034181	0.046608591	0.036876435	0.062760093	0.111663875	0.192654648	0.063814666	0.404915236	0.366709634	1.144161868	0.435522616	0.030563685	0.483171579	0.394077881	0.163693349	0.084817288	0.13973619	0.084910234	0.151970526	0.071016102	0.017040719	0.774805393	0.146786048	0.2017997	0.2849473	0.122905933	1.134353482	0.158480731	0.057065479	0.267404861	0.163037058	0.109270621	0.19653344	0.537387334	0.143718984	0.133529052	0.062613147	0.828506829	0.359036519	0.348685636	0.150494041	0.116297978
Docetaxel_1819	0.021691573	0.119874837	0.242199689	0.011971885	0.182431942	0.272529382	0.37028881	0.223848119	0.017569753	0.013841046	0.044607292	0.072440241	0.102505013	0.036346009	0.122523816	0.118982875	1.22871814	0.178855656	0.022006927	1.088103522	1.146343516	0.082917642	0.044465021	0.053558453	0.04915475	0.05753607	0.042074044	0.00874025	1.087022981	0.060195657	0.112720444	0.088507369	0.085522286	0.652759304	0.081414536	0.030853162	0.086377224	0.167699242	0.043387719	0.459375672	0.239435253	0.0351854	0.089355823	0.066679709	0.998594052	1.577173798	0.2588114	0.115808373	0.097389505
Epirubicin_1511	0.261050447	0.809513211	0.89002741	0.160213636	0.46372168	0.897963516	0.719893738	0.719209709	0.269729414	0.303235002	0.33742655	0.335996872	0.323794021	0.16002842	0.374346299	0.224198394	0.629089001	0.562585717	0.169298771	0.773064172	2.198190037	0.425144329	0.312556859	0.473879691	0.432288295	0.412547258	0.140756791	0.08897188	0.643063996	0.222853578	0.527547575	0.272577998	0.411804165	0.266389455	0.254390559	0.29559611	0.489528528	0.349593592	0.185945772	0.353033535	0.467175491	0.437388978	0.317114598	0.163692953	1.071259094	0.633756175	0.635249259	0.382329126	0.360903662
Podophyllotoxin.bromide_1825	0.355934155	0.418407314	0.459099937	0.262001474	0.560649267	1.113093617	0.994513206	1.092969323	0.323092602	0.272063824	0.287670195	0.43276986	0.63655199	0.278310505	0.807838675	0.763602344	1.715757713	0.692709217	0.234152028	1.086626045	0.990491359	0.409830475	0.344347218	0.411749431	0.382991719	0.417948656	0.329373864	0.218490467	1.238927257	0.443204464	0.50181504	0.530603309	0.448503003	1.533477327	0.483963514	0.306273122	0.695206099	0.552645735	0.417037796	0.822901381	0.762821294	0.454473691	0.440947103	0.349684784	1.549579598	0.843093357	0.753578365	0.600334666	0.438105585
Sabutoclax_1849	0.594209883	0.692576114	0.500144023	0.514891061	0.897646299	1.305357418	1.074500706	0.659592405	0.382153307	0.544518621	0.804151442	0.47959246	0.797220386	0.434473552	0.786347297	0.768856061	0.651236651	0.93259695	0.321001761	1.587173299	0.576881156	0.645396391	0.625672278	0.684409397	0.868512348	0.712716749	0.478621283	0.362840257	0.939214514	0.636054826	1.379063578	0.827219444	0.509651095	0.80123529	0.662264354	0.564735026	1.583340992	0.504804697	0.610326447	0.568749878	0.861483222	0.977014832	0.692372646	0.491423178	0.895244196	0.267280666	1.089286956	0.777392326	0.750869032
AZD8055_1059	0.865686308	0.932941914	0.940504562	0.630255353	0.854089141	0.996213369	0.90510253	0.750205647	1.031756177	0.944214874	0.879797021	0.768675573	0.713167063	0.742212931	0.82369299	1.264166268	0.866493263	0.642766787	0.71424172	0.750334093	0.976198772	0.820446401	0.736986535	0.759788736	1.011218457	0.789423865	0.634072937	0.896561918	0.729875006	0.848802951	1.01620532	0.725902581	0.862222149	0.757392864	0.72756897	0.761070591	0.837556279	0.720506541	0.639415188	0.950568046	0.79059753	1.155936518	0.753602785	0.727794651	0.883551892	0.819416447	0.918693269	0.835925926	0.782979361
CDK9_5576_1708	0.727855406	0.658430741	0.949985996	0.319454644	0.943514623	1.370393702	2.234165984	2.306793942	0.492104041	0.684656305	0.313293322	0.462167371	0.805002933	0.377774901	0.461621976	0.776632448	1.836934023	1.301082059	0.324040937	0.727509795	1.966016231	0.472438125	0.584343539	0.49510906	0.354873088	0.868050593	0.484589167	0.292530347	1.542729766	0.392547167	0.562240149	0.580989535	0.340339439	1.037831931	0.629202068	0.531439916	0.48514726	0.459629778	0.591524257	0.738508761	0.862035585	0.317141472	0.559004924	0.35538114	2.614919539	0.608680383	1.109668167	0.882590992	0.801250134
Gemcitabine_1190	0.227689568	0.644096959	4.185495135	0.06978641	1.746783406	4.169117056	1.996298125	4.052115709	0.166191173	0.38948447	0.09694899	0.366020901	0.584895022	0.177730511	0.25096798	0.688754585	0.683598573	1.657198656	0.061723611	5.997723214	34.23224586	0.690619645	0.373435691	1.068757546	1.436910137	0.772121918	0.149876569	0.187025265	2.582572222	0.216915305	0.652565945	0.71256586	0.718329582	0.847103233	0.284348246	0.319271871	0.484784975	0.521319045	0.277674352	0.702160221	0.73784858	0.252604048	0.228521752	0.082265082	9.033676752	2.783445355	1.678568561	1.046957756	0.658125517
BI.2536_1086	0.271741855	1.15246908	1.980719683	1.77885334	1.652306573	1.770264748	1.081341054	3.205164928	0.31280209	0.074898919	0.920624294	1.573378035	0.796857023	1.805094674	1.214172147	0.783252878	2.708647512	1.773877649	1.091659559	0.596965808	0.327792097	2.213823924	1.756616217	1.176748664	0.658721223	0.874278963	2.356469907	0.70331605	0.551838315	2.090603331	0.376233948	1.212078674	0.677609277	1.614284745	2.590562411	1.778635332	0.967794892	0.32652428	2.689938184	2.207915637	1.539841563	0.588333586	1.308099156	1.583377995	4.592274919	0.045534595	1.806290809	0.8500624	1.716596076
Topotecan_1808	0.780539028	2.295815963	2.457542234	0.314256634	2.286658878	4.003765372	4.024945617	1.653265069	0.362545782	1.538023673	0.854320834	0.805201671	1.136710415	0.570652404	0.578184041	0.784495459	1.610534437	2.733145291	0.265472324	5.810735567	7.075598687	1.916285051	1.036375281	2.376064863	1.14408313	1.870409754	0.355006298	0.679348076	2.962400714	0.44035706	2.34344079	1.806945052	0.792158773	1.038552331	0.670871325	0.60189656	1.162529502	1.07628578	0.657114964	1.098153001	1.951303174	1.103362917	0.840042193	0.381485966	4.019227976	1.366597144	1.50480199	1.083964063	1.081559025
AZD7762_1022	0.352200052	1.857886032	3.0835113	0.397308623	2.799808117	4.925098748	4.499520687	4.407130758	0.541171579	0.426976575	0.338483507	1.40165869	1.228798839	0.398508551	0.812324185	1.213122986	3.19861354	1.977776357	0.170675561	1.379567682	6.855742473	0.953948952	1.026717763	1.552538008	0.80106748	1.588865838	1.017253058	0.175414126	3.510095799	0.527914215	0.879742914	3.566572535	0.532498248	2.47945915	1.223920943	1.108144447	0.515032123	1.738705795	0.870104386	2.340016814	1.252764033	0.258159054	0.824332052	0.378897823	6.632192858	2.517075603	3.513358343	1.120729216	1.688215044
Telomerase.Inhibitor.IX_1930	0.681697037	2.276324008	1.736322905	1.352216681	2.224566278	2.187119597	2.26954268	2.689636752	1.19317721	0.930350678	1.128447194	1.301636984	2.585645091	1.081007617	1.807885144	2.611219715	1.774385307	2.342055714	0.75877071	2.056007046	2.025171603	2.495487703	1.167754842	1.679201723	1.434291873	1.895390272	1.187417017	0.621828986	2.000290219	1.878186868	1.830433942	2.256215618	1.353955745	1.977354211	1.42297616	1.857844051	2.783172679	1.458582236	1.043699106	1.372090522	2.351291133	1.350875293	1.553261416	1.135354238	3.308767138	1.332638033	2.820116248	0.994285061	1.877147759
GNE.317_1926	1.985149872	2.822031275	5.348888321	0.71788432	1.682492326	1.949835602	5.050488706	1.751764074	4.884820602	2.176726462	2.263916897	1.334479177	1.413062326	1.033032707	1.96645607	3.099596455	2.344384261	1.058722586	1.366248908	2.851712428	5.616754101	1.126899625	1.1299036	0.991276741	5.453959712	1.288902565	0.982920473	0.978225096	1.850876575	2.035482426	2.890914555	0.860483116	2.154293187	0.883989964	0.96329316	1.155243187	3.147202922	1.437920834	1.005269471	2.630206947	1.059390414	2.890288219	1.122537416	1.16312426	3.110929761	2.62830901	2.716266862	1.725363947	1.706295594
BMS.754807_2171	1.902686928	3.097449235	2.23516549	1.065207702	1.607812308	3.950386401	2.389649149	2.2905899	3.783106706	2.272258808	2.033502331	1.561022643	1.801213736	1.551779875	2.07241759	2.935766054	2.39016233	1.793044536	1.132920322	1.515385266	2.852150762	2.387025224	1.897440836	2.634587699	1.855152863	2.241683125	1.294791794	2.846876247	2.149583733	2.20298707	2.29771273	2.609766057	1.28731561	2.247790138	1.219311711	1.117840566	1.351749808	1.532140993	1.338233013	1.839418678	1.713169362	2.538706952	1.330933347	1.215451304	3.403483745	1.224082201	2.785903105	2.358461182	2.105506105
PD0325901_1060	0.504489725	2.470422697	5.166645384	0.544329207	2.035589466	1.573011885	3.217278728	5.104794352	2.184962714	0.821045013	0.637323079	0.988173402	2.29352805	1.007590822	1.106990379	1.412024782	2.781726784	2.53095871	0.67043154	2.181558636	8.823052753	2.017824323	2.021485133	1.893865756	2.569650805	2.449362778	0.987776326	0.965892361	2.596586045	0.962236786	1.282010968	2.334014126	1.098811176	2.073209394	1.124264894	1.653174982	0.738048237	2.332306979	0.729620135	2.032024552	1.656870745	1.001556223	1.301118563	1.055093214	5.99695112	2.273168114	2.707461221	2.76526574	2.907719637
MK.1775_1179	0.378350164	2.852661001	3.125464557	0.877495505	4.155881896	3.452255997	3.596880523	8.875914583	0.708659891	0.46469328	1.090012744	1.837896047	1.781821608	0.833484165	2.872496416	0.65261903	6.325092401	3.172567338	0.741338567	3.954880067	3.589485824	1.8094436	1.754866532	2.668733674	1.569205567	1.999094606	1.706162805	0.259928588	2.217625131	1.182446639	1.053553982	4.415338421	1.228959799	7.308617764	2.001802234	1.389875562	1.494690043	2.516132952	1.151217998	2.546802348	4.034602624	0.583541849	1.795331142	0.745440094	8.897236461	2.892058343	3.799396688	0.843767406	2.164715131
Dihydrorotenone_1827	1.762658777	2.483906442	1.393934993	2.748199484	3.571372201	1.767009923	4.368492403	2.493362031	1.386486959	2.212871036	3.191217107	2.273262862	2.305320848	2.491944462	3.785732252	1.628771757	2.720568194	2.437660164	1.955766035	4.004416731	2.068065491	1.197968792	2.293231631	2.382531012	2.636531441	3.882396614	2.184375914	1.711991093	4.256522733	1.863408463	4.238260553	2.50507291	2.683130259	4.027440656	3.014689077	2.353455666	5.543498033	3.893726655	2.124619576	2.153520613	3.435714146	1.624410927	3.425979488	2.901499967	1.927796181	6.842789499	2.251570963	1.383405867	2.749276477
Teniposide_1809	0.83078729	3.738767238	6.70565935	0.500012384	4.420203493	5.963630762	5.822941408	3.363688206	0.388365589	1.029917402	0.909099195	0.963958135	2.878156866	0.467234525	1.294206749	1.116901448	4.558261786	4.943506336	0.331768517	8.419444618	25.28246713	2.406390002	1.371087565	2.720348546	0.983927055	3.311300429	0.534933792	0.252526819	4.89295789	0.886627144	1.942090802	6.473399658	1.211619054	3.043313274	1.21177711	0.790520923	1.228087539	1.755187013	0.895370139	1.464177595	3.57823806	1.377576543	1.686636968	0.593985299	9.053678393	5.645360939	3.374271025	1.300822188	1.787122089
Mitoxantrone_1810	2.857240922	4.412421325	4.941362676	0.558734436	3.128180051	5.962044553	6.159044488	5.61832032	0.661224412	1.433962146	1.677082555	0.869170965	2.5741321	0.629514528	2.170625086	1.775276632	5.716438064	6.342064711	0.40070336	8.140116211	9.944824168	2.299371961	1.492159804	2.332771398	1.586395442	1.805070139	0.514800797	0.348211118	2.626907379	0.810659557	2.590065335	2.42347605	1.548084612	1.307557439	0.915900855	0.648362487	1.746444861	1.052038706	0.966643573	1.505965105	2.774130089	2.723416596	1.342484719	0.567245892	13.17741741	0.659094472	3.216572208	2.957001505	1.860794965
Trametinib_1372	0.438792959	3.706083272	12.08512404	0.303326146	1.608201961	1.62236002	2.802815145	3.078548049	3.420401222	1.524589961	1.254680556	0.929072585	8.724121907	0.983108987	0.459446082	1.492821082	1.667180367	3.976225003	0.820614244	2.033777164	20.82298852	1.764676168	3.319366134	1.084870559	3.623589942	1.454808639	0.765810445	1.75784615	4.364654092	1.185797549	1.290763455	1.957668602	1.357178237	1.830565543	0.640143385	2.154921901	1.07414457	2.830179165	0.831262604	3.385525955	1.413879803	1.770351523	1.505712247	1.303682954	11.69169946	4.775313481	3.276243082	5.362666444	4.318385623
Buparlisib_1873	1.692297835	3.523224371	5.324858148	1.474313636	3.054405832	4.093856782	4.249118909	3.68077819	3.016277309	1.598807466	2.134991612	2.321363325	2.387346657	1.790281513	3.838812534	2.685991586	5.920577047	2.981446618	2.140028476	3.21231758	3.712439361	2.066596297	2.30920703	2.207552482	3.070229741	2.038639775	1.922328669	1.084828485	3.570696191	2.378519912	2.7859318	1.806637983	2.548157609	2.136146834	1.932993712	2.020639859	3.639067924	2.656155448	2.170864968	3.491620926	2.357063474	2.657233346	2.084999961	1.999661142	6.383607871	3.203304447	3.50034481	2.421692107	2.362897518
Foretinib_2040	1.289403214	3.937863381	8.209056665	0.950034122	2.356251607	6.767875462	4.73732605	3.239239598	3.190950828	1.432190223	2.369928031	2.588130721	2.746938968	1.64002059	2.22425182	3.345060139	7.922409991	4.241619021	1.223902916	3.600593642	8.136488466	1.956071265	2.400051913	2.579030381	1.520841257	2.163014585	1.787872346	1.357582363	5.312027495	1.410587939	3.107971178	2.778217119	1.854593869	3.665221264	1.648203409	1.84429957	1.74999	4.724507388	2.278553521	6.69578207	2.09532727	2.176396572	2.051233061	1.421899527	10.64903424	3.979034715	5.079922486	2.903376499	4.507015248
Pevonedistat_1529	0.383024605	4.872195634	2.957104029	0.53410026	5.194548501	4.629773677	9.479794242	4.664942369	0.442574821	2.144722408	1.005899623	1.944865785	3.460770607	0.825065876	0.856952476	1.840887546	2.058179069	4.429514015	0.310360774	2.793572584	29.53332342	5.798802177	1.281853101	4.394427703	1.487697493	3.928633715	0.977177194	0.736580639	5.723870654	1.042377288	2.73391649	3.660668631	1.912000332	3.27116879	2.258370145	2.490438177	3.275265208	2.883832205	1.036724504	2.483271335	7.32755853	1.02434224	2.855627316	1.024342033	3.952802852	25.70524327	5.220468101	2.479962469	2.254508912
Obatoclax.Mesylate_1068	2.022120538	4.354213342	5.244721281	3.197454044	4.56163644	7.382824391	5.901987446	4.40656008	3.494933927	2.931291456	3.568084886	3.472292102	5.497679036	3.225117973	3.532378374	5.326993892	5.831070429	4.95059295	1.6686148	7.305422826	4.479773973	5.357946012	3.65804337	5.237420736	3.40071348	3.853971085	3.123483037	3.288785122	6.774419504	3.760747989	2.835643893	6.256633523	3.159381235	4.711020205	3.945454493	3.499429539	4.068324545	4.362508887	3.683652483	5.239670661	6.524214785	4.081159801	3.357516949	2.633495651	6.758398434	5.510595276	4.50341819	6.562614111	4.725892238
Vorinostat_1012	2.752235547	3.711790766	2.48630176	4.802249267	6.86191905	4.4289171	7.271242221	3.584707745	6.834705788	1.989166503	3.210467562	4.217037053	4.034248019	3.644059058	6.038015959	5.262074112	5.001034727	4.811737779	2.458105275	4.538990607	3.063753754	3.118989508	3.734810368	3.477106757	5.651719055	4.413138141	3.912298651	2.769063826	8.494619253	7.650145116	4.900871422	5.067209188	4.801449823	5.361942818	3.875961093	2.648046611	7.404422366	5.390148662	3.99076715	3.954230612	5.383197039	4.971884714	3.491745795	2.452753287	6.035273024	4.006449565	4.935734463	3.098705063	3.952440856
Pictilisib_1058	4.417967645	8.516757586	20.46029337	1.546743983	4.32793004	4.251709428	12.65282185	4.889374077	14.13749908	3.070928215	5.312208316	3.447669661	2.004851102	2.414193344	5.807570379	8.194973535	8.985445816	3.853361467	4.031225842	6.589284699	6.812646618	1.436782493	2.729678934	2.322551988	9.52453029	3.267441045	2.205389383	1.145744773	5.609556616	2.596747086	7.657360795	1.519717238	3.968936566	1.913019108	2.707925641	3.024111486	5.555265463	5.228596885	2.815566276	7.351855245	2.215179048	4.91410531	3.013529268	2.59590088	10.84035693	3.631779175	5.802821413	3.518716827	4.954314427
AZD5153_1706	3.758177225	4.738979548	7.228550703	4.379171275	6.472494234	11.44152083	10.18805407	5.878831023	4.679104391	4.217553747	2.831496767	4.472804818	13.78951562	3.473011371	4.506154066	7.621137647	12.4446187	8.424632393	2.134714698	10.06890434	9.57781935	5.078039666	5.932361499	6.697368619	7.411006572	9.301773457	2.760366703	5.732616394	27.75784435	5.627917342	7.728215253	7.276632212	4.081192441	6.764458286	4.205728057	3.912749441	5.313855788	11.40318406	4.892216431	6.780725426	6.482044391	4.939776998	4.364597389	2.943174108	12.1881226	8.364257565	7.250370938	6.8584969	10.24163406
Osimertinib_1919	2.775697724	7.842737242	11.21985992	2.828255952	4.692750712	3.679774639	9.393744778	10.3428542	9.883045158	3.344133669	6.136257481	4.850022269	1.951472603	6.203356829	11.66436134	6.193292953	18.9829773	8.004880185	6.879672977	4.173071924	3.362139722	1.745020369	6.550680287	5.442500959	4.221185283	4.131900442	5.32970756	2.046482345	4.682437438	2.213037036	3.425402313	1.824778325	4.661157723	7.583737059	6.611085204	3.421265774	4.941896974	4.633545864	5.518720734	4.501297479	1.8541873	3.520985798	5.374895698	4.542802186	7.458324195	2.512674002	6.52210217	5.991348257	5.302619754
Afatinib_1032	3.191945137	7.592573585	10.85083436	2.668141526	5.705235024	3.057617397	10.74329154	10.72881342	11.00949303	3.676335173	6.020236591	4.753781275	1.809753494	5.304020929	13.60222546	6.270158793	19.50484895	7.505093725	7.855520399	7.93122044	3.784743161	1.19591792	8.200615715	5.141951384	8.918883583	3.96955521	5.543524259	2.396036434	3.97882403	2.116169323	2.787035722	1.213738479	5.525443627	9.521482796	7.486235507	4.047185612	6.530822149	4.660587803	5.681901829	7.914754448	2.228768897	5.344827586	7.49590188	5.117099378	14.56919474	3.257564697	6.968613442	8.404665257	5.499689428
Dasatinib_1079	4.487831012	11.12588375	62.01274139	1.088812886	5.309047714	8.081117694	9.57798486	7.701292096	11.25807588	6.736175023	3.176587488	5.086302552	4.83025237	1.640616527	2.944965824	26.39355989	16.60110487	7.97884047	2.143850182	7.669397148	7.609301902	2.830741499	2.146458445	2.25636296	3.32480732	1.945011925	4.407077102	3.647579492	9.478017337	1.673913444	1.044488282	7.592958557	3.983189211	8.512984858	3.157500059	3.313245913	2.710027639	6.900809392	3.494276769	17.62700859	0.928076108	2.996686624	2.086247647	0.797423486	25.58768828	5.231291262	18.04000723	13.90815532	7.013715169
IGF1R_3801_1738	2.501420091	5.442791762	19.86840343	2.081169571	5.030913484	13.48817397	9.719504264	14.44838823	2.226384932	0.782021515	6.162977164	3.066889284	13.09405159	2.720006147	3.189129355	7.66157716	36.84664778	14.45429917	2.075476038	19.51615823	28.57992404	5.130961087	4.215864033	5.522975295	2.847402736	4.294822331	3.480450596	0.582491087	13.84374942	4.112565145	4.190068127	12.05186072	1.870617864	7.889430817	3.114421012	4.247134054	3.921039182	6.540409676	5.38002789	8.673470314	5.234296722	2.220120218	3.220024426	4.001332568	39.89906434	9.129647187	15.05680045	5.063397438	11.16826687
Cytarabine_1006	1.68820249	11.35729218	12.88290559	1.344592523	8.693468646	12.09832474	24.13940771	21.34319537	3.6121629	2.158702048	1.902312674	3.421658264	4.79966377	1.860193134	8.082172809	4.15861287	15.19045624	10.29764571	0.998128047	18.35534354	18.3050514	5.43882972	3.158594963	6.109949546	5.274011516	8.152638632	1.897798564	0.723119687	11.3887848	7.307730221	7.597242201	3.142185305	3.341230697	5.904524911	4.797842521	2.629309301	5.043197894	4.012597825	3.419425257	6.320988732	7.097491301	3.124665297	4.420590286	1.886029739	49.62999653	5.24826112	20.03791845	4.531133184	6.708341888
Navitoclax_1011	1.922351978	8.872884797	5.99032451	13.1441277	21.6209158	8.152133741	12.07060594	12.74479545	11.45237328	3.864302791	6.420049356	9.941947275	3.030851691	5.413160813	15.99062131	9.900714987	6.772521615	4.414972497	3.868696884	4.200822755	0.811095444	14.81766703	5.999111026	10.42777802	7.347990088	21.83710473	8.466509489	2.123606834	4.481235034	9.282183915	8.310579229	17.3800098	8.148140183	29.3766039	10.73320502	2.72713582	4.865773788	11.43212469	4.593274203	6.243807029	14.90929287	9.45146351	5.52871544	1.99124397	7.291713163	2.417218215	5.590605776	1.78534138	4.794245816
Wee1.Inhibitor_1046	2.266218225	7.810532013	5.226044085	5.45411938	16.58084878	10.31038955	14.61673235	35.80582655	4.022783031	1.959919726	3.944243835	7.583673259	7.119460633	5.597646082	17.8513076	4.693293965	18.27438508	12.74870216	3.081494353	16.30999113	6.427872955	7.596195193	5.07404457	12.6055484	6.571323753	10.13665858	6.152884987	1.766637867	10.37654627	8.139703924	5.002479243	12.4780474	5.233417363	24.37093245	9.006262766	5.748089639	8.108848127	6.540952252	5.132741435	6.376857726	16.93857591	2.705362887	6.935519743	2.990794915	29.54073233	6.650851214	11.47711562	3.17418232	7.146159889
BMS.536924_1091	4.516419548	12.36601656	15.25070862	4.934062552	9.986770359	16.26509204	13.56089832	13.04320542	12.75173905	4.227252811	5.825951713	6.641518718	12.10028088	5.194230619	8.728621088	6.327807504	22.28676748	13.38166037	5.135974928	8.573082323	13.99284884	9.658612928	6.187509898	12.27572858	6.69663221	9.399681954	5.64502884	3.96939764	15.56090258	8.506200804	7.33709205	9.849324321	6.441630185	14.40514977	5.771475656	7.219580568	6.41017744	9.005998162	6.445036319	10.79856236	5.810679667	5.74406411	5.777096618	6.631680924	23.06880772	14.6252715	15.26929225	12.11487063	11.33981527
Cediranib_1922	4.776390921	9.291208391	18.50344492	6.455475839	8.668061554	12.76059027	9.366342614	16.75165369	13.16886106	4.237868754	8.729024835	7.284333742	9.907172193	5.638051387	10.72376693	13.45567442	16.97720953	9.880669483	5.73450276	5.388230647	12.73416384	8.560831748	7.217104802	6.981233272	4.211154808	7.18380339	6.520377538	3.114669473	7.685793616	7.326723878	7.834667315	8.584142828	6.230993848	17.67983672	7.447695435	7.854802253	9.187680919	6.092660481	6.898363172	11.09319746	4.708906196	5.828641648	6.412153827	5.88524702	15.04537119	7.593286926	17.75718908	6.512403155	10.67349952
AZD2014_1441	12.73345284	9.939927379	20.9136552	5.231721244	7.31892329	9.841878297	14.1018912	5.896765508	34.39575933	21.83898616	10.4274172	6.299815292	6.006112417	6.258506515	9.656547667	36.43523946	7.300689277	7.125483823	7.624326826	18.78564498	14.2664748	3.744660451	5.224037861	4.409885797	21.19845649	7.109284623	3.881054953	4.961113581	10.08374093	6.877860483	22.22389955	2.826026484	10.61880207	3.921743133	3.524464936	6.64333936	17.97481487	7.975776733	5.453206308	9.773026104	5.03001528	14.4690103	6.719175131	7.041766462	7.796646938	5.889212152	9.076183504	14.22166985	7.346443654
AZ960_1250	4.409898734	7.903587264	21.24151059	3.084201645	7.956776019	22.48316563	15.37316355	22.76013826	5.570981809	5.115835873	4.030954867	5.809147922	8.653940131	3.044849264	6.49395475	21.49925599	33.57886938	13.55857895	2.422166035	27.20072862	40.22196111	8.319892962	6.152893623	12.59650088	4.853802911	7.261690471	4.871604661	2.169587447	14.61092127	4.400006925	5.423640201	13.89919767	4.976416349	16.35027936	5.620945217	4.683912929	6.647917197	8.257788963	4.703812678	10.07240214	5.186820191	3.77382226	4.514199312	3.675527359	20.37639427	17.08226602	17.07171647	8.243474187	7.217193125
Entinostat_1593	7.028081506	8.992436932	8.151870686	11.08723641	12.50072191	13.64916729	17.73981081	17.5910509	10.30132627	4.049274199	5.574050917	8.09039349	6.375888984	7.357472003	16.1970238	17.16821904	21.35209559	8.438392975	4.445688602	6.881332529	11.64103262	3.552712333	9.437973211	6.468613467	10.22965175	6.801809308	9.771514157	6.614285764	10.94471111	5.752772716	9.790409152	8.922948589	6.264664293	13.29893148	11.76413772	5.741515308	13.63772152	8.58015736	10.05317305	11.38118605	10.09590111	10.91093154	8.057996125	6.390094738	20.44574768	3.776099537	9.394444322	7.808289483	9.398993064
Venetoclax_1909	2.678147979	16.02635816	19.16781756	3.906373726	11.65960379	15.30766367	22.26613681	19.26733038	6.559623242	2.846465004	4.283146461	10.8240425	6.10687301	4.434758082	7.651742989	11.9978148	21.26210965	10.06725091	2.058043853	4.440170916	16.64282168	15.93963037	12.53215156	8.466107979	4.959303903	9.008463314	10.000719	5.126834821	11.14757491	7.14984521	7.516615091	11.14041385	4.260268111	20.14457993	12.11506555	5.987435919	7.280794041	9.616921824	8.087333439	14.88968309	10.29533167	6.99256497	9.039662666	4.804576195	26.24463618	14.99827537	16.45676817	5.797283213	9.118878355
Ulixertinib_2047	5.934950369	9.404027029	8.350122097	6.892693045	12.04964479	9.974887817	9.927123644	17.78429968	8.481654069	5.491950949	4.777242638	7.963185452	17.85055151	7.799717297	6.773198828	7.060672901	8.970488501	13.78835274	4.586862964	9.579889913	10.0988354	10.97453976	7.932892213	11.41267688	10.35742915	15.53686304	6.402962268	7.841845155	19.4922677	11.38060729	7.993897769	13.55191403	7.478090074	16.66586156	8.448601171	9.914023929	11.40034956	13.75065627	8.556131794	10.6092789	12.54195493	6.720317874	8.925221774	5.973114349	18.10296037	9.454684963	14.36057789	6.908822917	10.02379946
SB505124_1194	11.54114942	10.48846411	11.30850314	11.47097306	7.600686846	6.777498887	7.880419139	10.28715482	11.17340583	7.149486244	11.3944275	9.85187182	8.954417469	9.966243169	10.49139706	7.483888263	9.700002917	8.671933018	13.11947809	8.147660636	5.341097925	7.639533904	9.63784063	8.37294433	12.4352092	6.625995055	10.02536779	8.887449559	6.226743953	11.4461916	8.769306059	6.530687586	10.96148974	7.436682151	10.4829585	11.22334573	10.9255752	7.749840642	10.84655153	11.07629226	7.768910993	10.24517231	9.146685911	12.15303271	9.217410926	5.983412114	9.266078811	12.2718037	9.525874674
AZD6738_1917	3.088985135	10.71640351	16.64099568	3.352178848	13.82363904	17.97756775	30.13147322	30.72225902	5.510613674	3.963547385	3.463356831	7.857906877	8.318187158	4.37097629	9.513812233	6.000417469	16.66056386	14.14771502	2.902771644	18.43131269	29.54726792	7.490164368	5.563011088	9.054518934	12.45522424	5.804766746	7.801076327	1.388415661	17.73252201	6.800251715	9.317152395	16.52031187	5.81886868	15.31479202	8.012873915	5.939961398	10.31702905	9.869587977	5.615669463	8.810722223	10.24052455	2.581675713	6.426502375	3.247967459	50.93383108	13.71431943	17.08115748	7.286712183	6.972416455
Alisertib_1051	0.595227616	9.571897235	25.6972211	1.86507723	12.14504196	32.32281316	13.04449977	22.53066892	3.718696039	0.867275291	3.935018662	4.475604707	6.858286713	2.254201688	10.0843992	5.579573305	64.51329777	14.83412383	1.002635908	27.7054809	26.34188135	17.99451786	8.712259567	11.67359065	4.267345675	7.0999729	3.66060651	0.451776069	5.955953613	1.710688524	3.752203572	20.315867	2.353078194	20.44214993	5.195815166	2.620833688	3.116665826	6.427414498	4.638843164	10.52040172	14.88683876	2.770353566	7.577888233	2.563288686	60.31292175	9.750728659	16.53404591	4.871586953	9.14741546
ABT737_1910	1.752993288	11.31907309	8.213600377	13.01732083	20.47970115	17.18447875	17.9529709	21.14622437	10.71113705	2.493136902	6.439856172	15.88689423	2.563267423	5.576415106	10.06060058	8.48114526	17.29097033	9.046894659	3.885691035	1.378462098	1.025901181	15.40345717	11.08656453	8.496324623	4.760887752	14.01177587	18.62969697	9.336331113	7.249072451	10.49722931	6.557749931	18.47766414	6.266060639	27.78994595	15.62276412	2.156850649	2.721606406	8.678036758	11.34784042	12.6480784	15.27585109	7.792274197	7.208557634	4.127183875	22.02465852	1.97367986	13.48316829	3.996802509	9.816504113
Taselisib_1561	6.975322351	17.01954247	46.5227434	2.187738987	8.163861563	5.314575449	28.57104541	37.41961065	29.23073081	3.064184005	9.203587658	4.326264301	1.97769418	4.281070789	23.3072203	19.04352415	39.31986689	10.11522704	9.435753578	15.68971969	22.6260457	1.068529355	6.173524298	4.246943511	16.74059219	4.790314513	3.392758714	0.691580741	5.586462343	4.0051192	11.41094761	2.5587538	5.312928836	7.48552653	5.520302087	3.445219207	8.881063338	5.920231209	4.999443019	9.599547626	3.086966708	6.790562888	5.045932257	4.129446598	41.65280071	5.090819625	9.32706972	3.30509755	8.617834098
ULK1_4989_1733	14.25352438	7.92505078	17.61116039	5.742798569	14.24350093	13.9092677	20.47815194	11.13624422	3.343722507	7.535419533	7.277884679	9.379088203	11.60362363	5.764853185	4.961368173	22.63396108	20.30584468	14.45945902	4.274682042	19.28712909	34.73876393	8.468115831	9.789337536	5.461379861	8.56852371	8.174695896	6.522963937	5.462596456	9.823798575	5.239564163	7.906562969	17.48608922	6.69823353	6.806791142	11.89901338	12.5182717	14.49615797	10.18977811	8.060096212	12.05158971	14.84958986	4.012686712	7.838470762	8.621218029	15.63618786	15.69152821	16.4039402	8.142997996	7.161929466
PAK_5339_1730	11.33306031	11.31247055	13.46972176	8.371796043	12.2470073	13.75430358	18.96006639	14.89676181	10.19817454	8.937479207	7.88053915	9.1171428	10.25575135	6.477144431	11.95948289	14.33913001	17.20828535	11.96054663	5.739029444	16.93087191	13.85149262	9.159968592	10.06466937	10.00208604	10.28656263	13.66387156	8.626245712	6.498789163	14.72102587	10.02216083	11.30624826	13.20531332	9.653847543	15.31259177	10.6309207	8.874841116	13.31731449	11.80367976	10.80723374	11.62936048	11.71156793	11.61698317	10.64950698	6.538412917	17.59121145	14.59032601	12.88417285	10.77811912	9.849463641
VSP34_8731_1734	14.3254494	9.482373005	17.63511714	6.254989107	14.15854638	14.29985121	29.12495985	15.16851514	8.430245537	18.52364136	6.709833201	8.988259992	17.17388622	6.607328715	6.372074203	13.59124051	13.7705001	16.32064386	3.936200183	18.55542349	22.90029805	8.1739918	8.879319606	8.383389269	7.779812657	12.4633564	8.286564731	6.777449661	20.13809542	5.731047543	10.41397995	12.62564232	7.055779726	9.220108282	10.95586769	11.55190364	10.08179275	12.29142888	11.4574092	11.94710708	12.63373513	4.374052823	10.15153321	8.998762479	12.72594867	11.4945927	14.33580976	21.73842709	9.321203505
BDP.00009066_1866	5.65985819	15.58480836	15.77745767	5.888924113	13.94822691	22.60398078	25.02916129	20.65481849	10.65283382	8.185039097	5.154928048	8.099169327	15.19194033	6.306643601	10.55911429	10.62473724	13.35535649	12.94089421	4.784349615	14.17282306	15.5387125	10.73063944	8.260850961	11.64884635	7.914252352	9.532359795	7.980121509	5.128290048	16.71578171	10.68806389	7.903013725	11.29375407	6.620597633	12.12022264	9.243633086	10.75305404	10.05737551	8.226613455	9.364708056	13.55665905	9.516273808	6.321389008	9.133226849	6.976032744	29.36771466	9.08132243	15.97933215	10.68348673	9.327842536
AZD5582_1617	16.26935584	12.60164069	29.76257227	3.859993352	19.08569394	9.66456642	18.48280575	28.91199685	4.037647922	2.00926418	2.464453897	9.167623268	8.418263853	3.763924845	6.422011305	29.0520627	68.89635695	8.795264513	3.760410042	12.47275475	20.34580427	7.422264099	5.042157453	4.033105737	5.819046784	7.227553644	10.05385038	2.39792518	3.524117178	5.226491338	5.442827236	23.89451489	3.469229898	7.345012352	13.65114981	9.913000157	11.16669035	15.75728156	4.308126281	12.55714214	8.412391335	8.625069343	9.394948096	8.181738066	13.25155669	10.23861938	15.82388688	6.987597428	7.21486514
AZD5438_1401	6.292043843	10.06078875	21.18807116	3.740717518	17.4843821	21.25226489	45.75526976	26.02467866	6.097538744	6.745960132	3.652486736	7.565014267	13.07155376	4.247500675	4.871222297	10.72106981	22.6822701	19.24100279	2.583085461	9.477118029	48.23010011	6.559114054	7.22230273	8.235217116	3.779573636	9.920637783	6.861170581	3.848664857	22.04380745	4.813633881	6.319521453	9.364687055	3.986605355	12.45291424	9.992381499	7.313557936	5.308329922	7.517499022	9.86254133	14.45127086	13.4706358	2.919808767	8.31067667	5.807155693	47.1603678	16.18974751	15.14537738	15.5646037	9.100613726
AZ6102_2109	8.960049521	11.74127445	18.78686766	8.9849228	14.19775594	16.5610441	18.14162544	16.76072532	11.48346083	6.79087998	12.29784994	8.36838126	14.38101281	7.766688194	11.17545837	15.02418086	24.13630748	17.25660426	9.407954184	12.21831866	15.85537596	8.984411397	8.807749027	10.20899882	9.499033768	9.89387656	8.190441114	5.693334715	15.90788217	8.977623257	11.22450786	9.571261885	8.694811599	10.76786035	9.746393317	8.212859177	13.5022607	12.30228074	10.03783693	13.92648248	13.02518902	10.74805603	9.280324646	8.411607445	19.21087702	9.863031289	16.42509607	10.63255251	12.14009218
JQ1_2172	11.06725961	17.44336369	10.82432184	6.150839892	5.936394955	18.9559809	15.99771507	56.84574135	16.20889077	2.638609034	6.491922477	6.302329333	4.361457837	8.554514676	14.80739479	40.08338726	38.60147922	10.54628845	4.807154094	3.97416837	8.706054277	15.70402321	10.78625736	13.73798333	6.004218361	10.34349061	8.02305015	7.246548545	3.692590534	12.45010336	12.27502858	17.9449439	3.141542603	17.16670063	8.270834027	4.263544803	3.625651123	2.881391324	5.639891891	4.853256095	9.992005259	8.606876089	3.946256758	1.960756993	44.83755751	0.465591887	9.959664317	2.745299923	11.44137041
OTX015_1626	5.984673478	13.47617012	18.03261716	7.560801214	14.6941488	25.17081814	21.51033037	15.35431585	12.20338756	6.300793024	4.967899119	9.138280331	19.87739365	6.127852426	12.99826333	21.04194413	38.50218232	14.65493022	4.370755353	18.76993681	26.34572744	13.52128301	9.383384143	13.94403212	12.08643186	13.08360946	7.959105062	9.367728447	44.37229522	13.72642432	14.38035233	18.00380565	7.068852109	14.59299821	10.17722533	7.644257619	8.239410837	21.8127061	11.8698958	17.49353864	11.13854571	9.294502627	9.455343792	8.376202294	37.64187094	18.83534865	18.43281204	13.69813919	21.02980657
Gallibiscoquinazole_1830	14.55765523	12.46189466	10.57329041	10.9314201	19.53286439	12.48725321	17.35903641	20.14549219	9.743390055	9.348401577	14.23153845	11.21673223	12.3927806	12.42057375	22.02031569	22.1291513	20.70030672	13.32284895	11.180232	18.85039318	11.42595291	13.39826355	9.571887733	12.18417031	12.16256565	13.44032026	10.55982918	8.109225435	13.54110542	16.11676165	18.34782319	13.85127474	14.23219386	22.85647836	15.12751574	10.67151501	18.07996417	13.2368652	10.98897453	12.09410627	16.91795106	12.5582093	13.65189708	11.12646945	18.43699887	14.90167083	16.14882815	7.342314116	10.47975745
NU7441_1038	13.80501418	16.08999034	18.46161585	9.697793074	13.05226698	17.94341952	14.12875511	21.01026081	14.0170574	11.07767198	12.54380552	13.19875026	8.43048881	13.17663235	12.61845477	19.56468882	25.0251347	11.52498801	11.89259589	7.92884926	13.18025278	16.86090125	13.67663405	14.34501687	12.31930503	10.91729551	12.80048503	14.61432452	9.177387553	13.15423088	11.85979378	12.71896545	10.22215333	15.8712858	13.57279076	11.64976734	8.711659126	8.902500154	11.75140802	16.48550024	12.94188107	13.2678867	11.04228352	9.719076278	22.81974841	8.231044839	16.14465234	13.79110407	14.91264834
YK.4.279_1239	2.304324283	11.7509823	20.67450897	3.037773427	13.77191429	19.91218962	27.16262269	39.55621762	3.956768372	2.613859817	4.167056124	8.237305219	9.425992973	4.295860911	18.1877303	8.191096032	66.71268346	13.62513628	2.878611301	20.82993938	22.67636348	13.39694117	7.466012859	8.312241488	6.340063342	7.406739121	5.955379419	1.708427573	15.55494376	7.454642693	5.873815807	9.497665101	6.776586792	32.61058434	7.968698649	4.824843425	9.72213047	9.169535537	5.609100403	19.45057642	15.74943053	4.897685801	8.766034594	4.259006888	69.75060238	21.9956483	19.41488706	5.657921007	8.019287779
Savolitinib_1936	12.7081646	15.53548004	18.01804834	8.08011687	19.21062071	18.69715234	14.07869506	25.59593886	9.280696918	7.16193586	10.10631581	16.06941889	5.29561667	7.889814866	20.73789499	14.33352379	28.44478865	13.07221509	8.843269251	15.38092266	18.69509221	10.16308188	14.78464255	14.46439322	8.135743922	11.21612906	12.27727914	7.215415736	14.90180584	6.023112025	15.84185442	8.83540243	13.80570243	19.9734933	19.95296755	11.09301574	16.96638249	15.57838982	13.83642111	18.28572002	20.12759106	13.48812791	15.02890701	7.740053325	23.37374452	11.7153474	12.76242562	12.43503698	11.94577343
Afuresertib_1912	6.364388557	29.79442342	27.00454822	7.149576439	17.88909981	15.9033972	35.34285456	19.96808145	36.93718854	6.473359033	13.74416201	7.183894593	4.60475968	8.949905763	34.38154152	14.79224364	27.95017167	11.53996535	11.85679704	12.51358165	16.48440965	6.12939876	6.421121107	6.70325033	17.56357672	9.821979767	6.548493346	3.590078635	5.703856824	13.76414283	18.75074411	5.248668462	10.72186942	9.835099198	9.433752822	6.561068116	23.61138005	6.778065431	7.284939264	15.72557796	9.2982481	17.27814602	13.02268377	8.746640132	35.57983054	3.668869347	33.93843975	4.475853023	15.55454029
Erlotinib_1168	6.144934141	15.57683975	23.39088136	8.47778109	23.52117048	17.09522847	25.243707	20.50447591	10.83215985	8.269922428	11.19206153	13.55898903	7.152401991	9.463215358	16.65707834	6.885286657	38.34103116	19.41130642	9.688478971	8.276500526	12.10248504	10.03538446	17.28945942	13.03123915	7.861655199	12.84390998	14.11617239	6.808969518	11.51685151	3.182453237	7.403722596	7.341956979	11.47932983	26.63294798	21.93757458	14.33536303	9.273228701	9.788725325	14.38887223	17.62908507	11.11161178	7.405938029	16.38619658	13.63932463	24.63175346	14.70505706	20.87532538	20.33851837	15.2824666
Sorafenib_1085	9.472722071	16.55570233	12.03289664	12.79434716	19.29447849	17.54669245	27.8821568	16.46549814	16.96531623	11.30310042	11.50667526	13.00943192	11.88807214	10.41519218	26.64255138	20.35868583	20.21678054	19.13794238	7.930602609	22.91840063	14.91463324	8.971433351	9.21132727	14.91096353	14.89940058	18.60668746	8.629294621	9.327673009	26.45858325	14.62576675	27.55402135	7.841170835	16.7508391	22.39513686	13.87143567	9.420338592	30.9119557	20.06929997	11.64840169	16.1358245	20.71800353	17.04967414	14.71638119	8.603853698	19.68889292	17.31487173	17.16944168	10.51102861	13.82245846
AZD3759_1915	6.218065822	18.03572774	27.04507252	9.796249506	19.51606895	19.04983372	24.75815271	26.97588505	15.55258801	9.517887862	10.86847555	13.22201678	7.31367751	9.986423942	17.13555733	8.606898844	29.65322162	17.57190631	11.94397724	10.04431691	13.09275152	10.81245801	14.73304527	12.08786943	10.4033339	14.59136169	16.13329638	7.660510509	9.615264113	4.066200121	9.082068664	11.28133682	9.815294162	26.48599744	19.44757889	12.52372954	8.987348076	8.294905284	13.70296146	16.62973337	7.819441495	7.050318221	14.65013253	12.36977796	21.47312881	11.34485224	30.98857743	16.97244977	19.9356549
UMI.77_1939	8.268440607	18.44175349	14.97748398	17.24841889	15.50571407	13.62240996	14.70565644	69.92699322	9.840936469	5.023035248	10.89958969	14.31766414	11.0571221	15.33131741	17.91042839	19.9327008	37.68708358	13.7838758	12.70832755	13.07787195	7.686815304	22.45314894	16.2264499	12.98209854	11.39413771	18.31809268	19.65333475	11.33040749	8.954935685	19.40494295	8.973085264	18.06896282	11.27982148	34.6157628	23.00001475	13.26949519	11.81328426	10.2692615	14.54477927	12.85082769	16.26442086	8.115397261	13.67989641	10.64040357	27.4120826	6.874620648	14.15531606	8.297154591	14.7012336
SCH772984_1564	4.379435884	14.44477376	32.33906402	4.644033499	14.44395398	13.43610302	12.83699238	22.55584409	14.44772816	11.58593061	8.537190534	8.850596753	27.56090171	10.34107885	6.890913321	11.56562422	16.44989281	24.73391693	10.39444665	25.5894836	64.68357849	11.63060771	18.4969724	9.587484137	29.21381364	10.76223116	6.646437077	9.562249799	20.45853791	10.41672702	10.09944688	13.75749882	14.41806505	16.08387885	7.276713707	15.93798401	10.37238942	21.14650583	7.605110087	17.70794315	14.49949307	13.9272093	13.70264961	11.71466912	42.69836813	25.36307871	15.33147872	28.67011385	19.61305969
IWP.2_1576	11.21913329	15.49124095	16.39041011	14.22599975	22.2596579	17.20294631	24.11692363	28.88699767	15.97828175	10.83340686	11.87087114	15.21914655	11.27956057	12.62277851	28.0049178	15.90884002	28.14667479	15.58236426	10.28466945	22.96560593	17.10855065	15.06363846	11.45781579	19.85755377	13.74753773	18.0022629	13.27051321	8.576191187	15.70947044	13.86029979	17.5205974	16.80839304	11.51517971	26.9037447	17.04117528	11.55248626	17.00493661	17.39756537	13.72486191	14.38344979	19.00562855	14.0361587	14.69890068	10.12900819	24.62324445	15.75571753	18.24437117	10.33962716	14.32294874
RO.3306_1052	12.05880332	16.69934645	17.79082716	9.740634709	15.85767228	22.73202002	16.88133825	36.25273834	16.44035256	8.222247184	15.86056689	12.10979748	5.19765063	16.7911869	23.14809233	22.86473078	29.15370498	8.35964551	12.78202579	8.553812558	13.9723595	25.96416719	14.65893858	20.66056217	15.5588158	17.60643513	14.0823575	18.22208081	5.948801899	19.22095332	18.60323995	10.53795574	10.71049148	21.98248807	15.77821188	11.24190413	9.413133327	4.563042866	11.78160126	15.35042736	14.75733416	23.27193985	11.22800301	7.741121199	29.95072464	3.310578284	28.34460887	8.282967038	17.84397454
GSK343_1627	18.10017403	16.10120203	16.95376987	13.98620818	20.78813163	20.20418809	23.43886611	29.66745729	18.41314178	12.48986381	11.6683697	13.47017599	14.39791194	11.69907833	24.7356892	22.66026194	31.67243722	17.94405011	10.37425799	17.93672989	19.9304333	14.54699072	11.44469316	18.61065209	14.6520963	17.43509859	13.24371798	10.41711973	17.00700141	14.30394348	19.60417946	19.21570277	13.04320705	23.04917606	17.34331685	11.17416089	17.89268675	13.92573945	14.11533944	14.57150236	17.26448393	13.35258382	13.1881815	12.22091683	28.43888299	13.75874606	20.35519879	14.13193762	14.95138625
ERK_2440_1713	8.618019151	16.30766554	26.35110358	7.599211306	14.50197822	18.70385189	23.7578651	16.24309833	12.05827506	18.18963665	8.952034855	9.529493593	45.83946498	10.60592823	5.875626557	16.80462277	21.35764431	29.05912143	16.45735392	24.49528764	67.10472209	12.7306996	17.05405375	10.41773086	21.66507844	17.72489758	6.322462809	10.37722941	49.81527661	9.950162652	14.92778271	17.76131424	14.23830324	9.242392697	6.001265503	14.50292795	13.90136028	37.986351	9.687860093	20.63719432	15.56344329	12.7268204	12.65797175	13.29497111	41.66202585	28.57624219	18.35586013	28.50815407	27.29782763
Ulixertinib_1908	7.11865931	23.0275209	24.67564944	8.434177075	18.10093081	17.42943293	19.34815223	22.41317273	21.64997341	10.77605001	12.75513483	13.6724315	38.04808939	12.64200634	16.77372916	9.44266225	18.86232421	29.09886697	9.361031841	25.34684922	32.4026786	22.91051989	17.93856274	15.62777224	19.14116673	21.22269907	11.72263158	12.22959552	34.82953396	18.57892017	13.78040975	16.40021328	15.9406527	18.41269733	10.7346585	12.66615914	13.80167395	18.69845802	14.28533535	18.52468022	21.61483916	12.41602136	17.30977135	11.19795168	52.04256424	16.8001127	20.74274496	22.72877453	21.7255378
NVP.ADW742_1932	6.945377175	20.11120387	17.07706573	11.43957282	16.44189313	22.55415244	22.40330566	27.57567626	22.40027113	3.296884857	10.4194677	15.38032569	15.83942145	12.09961258	24.22923111	11.95001601	53.20910213	21.49892265	13.01765694	12.297666	12.47502754	13.45867025	14.83271284	22.71222587	11.39639677	14.35469061	12.6890873	4.931420313	35.21109403	25.85940009	17.07259902	14.94472673	11.9994502	29.69477158	11.92500751	12.07102924	13.93463544	25.22912646	15.968993	27.30962111	16.9049561	10.37898699	12.16915392	12.66198563	68.4128682	13.26644368	24.58832425	13.23413386	22.9224124
Irinotecan_1088	4.52025513	22.32799188	51.64398848	4.581034978	20.3928588	47.26639191	56.27823346	22.50710511	7.069535603	12.15290396	6.305605477	9.230829577	10.26363995	7.55881987	11.19538394	8.714780973	18.57045422	26.7979189	3.55475466	68.29785641	166.939526	21.04555477	10.02258661	22.96704584	19.81307194	17.39593546	3.939201958	5.52587722	19.98386741	6.864103656	22.90082391	13.91891541	10.18982937	7.496877678	7.465836034	9.73331895	25.67758756	8.576893772	5.486663501	14.03885575	17.73533323	7.992934438	9.399430021	5.143166387	45.77315318	25.9835349	27.26568234	9.524600533	17.64615253
AZD4547_1786	20.85494011	20.1822651	16.16571797	14.13435531	22.42554466	35.81134935	19.57305949	35.31742762	12.18536959	8.732723199	17.33771456	16.32737049	18.18587002	12.51523396	28.56289883	27.44552428	43.72606091	23.72388336	10.17730372	25.50223527	24.26384418	19.46978801	14.61527003	14.96447401	11.8338992	15.0249106	11.7332904	8.352508002	20.41295417	22.86349024	30.61000711	12.33035652	14.85259066	40.80388341	19.41565082	12.5129323	32.20430761	15.31451237	14.53433247	18.96914042	15.79940169	12.62460573	15.47786062	11.76089401	41.85084443	24.50636482	19.50581724	15.05000508	12.99252275
Fulvestrant_1200	17.85909485	15.69471824	14.5545934	17.25391646	22.43442646	22.52106853	22.88207248	30.09869607	16.91651307	14.80539353	11.0764428	19.69868062	14.12882842	15.16013581	30.6268059	21.86561889	33.77527248	19.74696211	15.72319056	19.30893615	12.65589517	19.32407397	12.49261238	22.01623919	16.07997945	19.77174493	16.68529997	11.40406429	22.85833725	21.06641521	22.29038534	20.29282997	16.70234144	30.16571333	18.63169418	12.16590459	25.66848202	17.0444985	17.46526399	16.37843298	17.45170324	18.65776185	14.38198779	9.959174971	25.95090258	12.31863913	23.25465048	12.24293479	13.62118975
GSK269962A_1192	18.69071736	24.1884834	22.55345637	12.16101637	17.16496871	26.52396993	26.85836826	18.97190032	29.29927317	21.61815233	19.05816098	16.11875596	11.69001337	14.38174428	18.47227025	44.10645464	27.34211483	13.46496044	11.13843674	13.78251003	38.52665557	16.90389963	15.98858638	19.23477987	26.95577257	22.45091433	13.04625157	17.10827379	21.8888791	17.89780421	28.58976491	13.34882001	14.90149876	19.44316193	16.96619421	15.37155327	20.00820373	18.81850926	12.72434577	22.6017212	18.58258336	26.82441505	17.6581031	16.22548911	25.12767102	20.70078453	22.67788138	17.53904227	22.82453451
VX.11e_2096	8.303975703	22.2584605	55.65362385	6.762918667	27.82400287	23.05277335	30.98979066	20.90610561	23.51210359	16.99667504	15.49426406	12.73003157	33.04582333	10.28909138	11.11816833	11.23310998	18.40125723	24.73267821	9.964735486	37.38372949	75.06423351	18.42618097	12.2287252	12.61888289	32.20455494	19.54088203	10.89418373	12.08743835	43.72876702	13.52809995	18.57096328	16.94426246	18.57340076	17.50986795	9.219788175	14.2545557	20.23032441	32.94906036	12.32351979	33.29891393	23.01462177	10.85461635	14.911091	13.27910167	60.32892014	29.85997036	32.29448283	31.33495049	31.64957261
Tozasertib_1096	5.439356292	21.13530976	35.05212459	7.989833059	22.25962108	45.37980786	33.07422132	50.38558867	7.123239586	4.714244393	13.05080276	13.32624658	7.105549199	14.53063218	19.17796033	20.86252345	49.42440655	18.90347367	6.378709456	12.52537486	34.4104793	43.04563913	24.12366766	26.94757769	12.06753368	25.03863462	18.5209679	6.109131369	12.74969952	16.52749949	12.8599108	27.73202029	7.036855401	35.33987116	21.16197545	16.58704666	11.15316773	8.330131291	12.03410287	22.30923276	18.01443952	13.92994131	16.33172634	10.57608442	53.3549107	6.2430687	60.40789552	8.358158072	30.43252738
ZM447439_1050	12.13357488	25.6806746	32.4434068	13.16051807	23.1594408	35.11427979	39.46481362	51.96525998	17.30741339	10.68161906	13.1819354	15.85052756	9.321479786	14.17565327	15.82018278	25.97680103	48.94598474	17.79244107	10.46488476	8.658617258	50.6210073	22.49557476	19.95860764	21.97298743	11.83448023	28.99415944	20.95630929	9.767958361	15.72499463	10.7466541	17.1472174	23.31914782	8.941129506	26.99577466	23.78613412	16.4493619	10.92823072	14.47479636	14.76630724	20.31235261	18.60008215	12.71354229	16.62649414	13.94983382	41.56472641	12.60118569	37.23504691	11.93166011	25.66749209
Uprosertib_2106	11.86763388	27.14456744	44.43836191	6.403344646	34.9323395	16.11838385	97.8559605	17.23721086	77.97626493	6.855660804	23.78350442	7.410226815	3.870225614	8.68399882	46.91258152	33.07299377	27.19408829	10.600333	13.711809	37.18116165	38.31122093	7.910237397	6.213567395	5.668102898	55.02571502	12.01397137	6.809674864	2.818998674	10.64338061	19.28523583	56.82620642	4.083206199	18.74257137	7.373492577	10.80775339	7.9857339	44.60720953	12.61155896	8.971988282	26.0589404	14.24656957	41.73267704	15.61992261	9.378693992	40.27514251	4.658518798	58.14508786	6.668406723	25.28991403
Uprosertib_1553	20.54557727	24.43899723	29.80971958	10.8019532	29.83259414	15.70423306	59.74563933	22.6162782	75.95149937	20.07794311	27.70912707	9.846034091	7.136457957	15.96695768	47.43580707	36.39029216	33.65909643	13.88467574	16.12117734	31.71254078	29.14998997	7.873165453	10.49474857	10.11453007	51.03616997	12.03651063	8.055418002	7.680871233	11.11022003	17.78289363	64.20600982	8.206240871	11.67970856	12.86521602	14.76247052	10.29400149	37.04449194	15.65690969	10.86119109	19.53691129	18.59819626	29.61843387	25.04967437	13.29540918	35.33505411	9.508740123	42.88972228	10.36399641	25.90773224
AZD5363_1916	9.028375408	39.79477802	65.02018973	8.408974059	22.32379299	26.23053814	91.05603223	33.31623381	50.63660216	12.70319594	17.85597653	10.21999563	5.827220001	11.6247523	53.51977956	29.5644222	65.55862148	12.87870198	17.58000216	28.65620498	49.91125686	11.38347018	8.483641471	10.23462869	32.60071845	12.40948889	8.124398619	5.450765281	8.440269949	19.47152622	28.77344102	6.942680909	14.88745861	14.20118555	13.55926696	9.808727077	41.62968049	10.6000228	11.94412216	30.2581516	9.133715054	28.91355646	17.12913309	11.51483889	58.67825856	9.647724057	56.16847375	8.485045783	19.96182839
Lapatinib_1558	12.48552125	30.07736229	23.65164838	12.81821988	25.38041424	11.74834446	32.37888428	22.80444108	45.74515647	15.96673702	26.50301035	28.66913157	7.553912609	16.64175117	31.21306293	13.13928618	38.9488947	30.43690296	19.02633456	21.02446593	17.20054661	3.246760311	19.57434426	11.5737031	28.15997105	13.74267995	24.84821841	9.173268893	41.74101466	12.61409414	10.7236761	5.238179181	18.88497512	27.61984477	32.31610862	12.81263581	21.9753763	46.86581961	29.62260687	29.5507758	8.328882982	8.029784253	19.92702965	18.6157253	33.23921381	38.84964778	20.7395367	35.11306254	19.59817725
JAK_8517_1739	13.86240389	18.17400921	45.57882735	9.021224262	19.25610969	51.93756647	44.71033242	44.39206419	20.33654968	7.374472275	20.40213556	10.47971914	28.76782684	12.49170061	28.29547999	56.18721251	115.5355257	47.3946541	12.72631248	53.04019652	35.79648399	20.29373723	17.57442351	22.72067043	10.82720383	13.75746264	8.302192103	3.34210651	22.24937492	16.68666141	19.86557201	16.80149283	10.54647965	24.53591656	11.90218071	11.01989789	20.9182301	12.82983415	11.82334705	23.49487197	10.1385471	10.38873839	12.36890833	14.70897121	87.38935724	16.38769434	28.81887433	17.0178589	20.55976004
MK.2206_1053	21.98472443	35.40584567	32.06770429	11.53630395	24.22098516	19.81508668	64.9385857	27.78654292	88.90729129	15.26986803	24.91252364	12.54335546	8.780494628	13.3717566	43.16651864	45.02936082	46.47904485	13.11198148	16.11466558	22.14499228	22.46423432	10.9479761	10.93314837	10.98614069	45.0532514	21.77838292	11.69514352	6.165996585	18.25763919	26.36658069	53.99882992	10.08002967	18.20955109	22.92808704	15.26525535	9.26362494	39.38659831	16.93351745	11.05455675	26.70338113	12.29283643	28.70888516	17.44297284	11.27141853	41.35599313	11.69492601	46.82866961	11.42684814	22.39875673
Axitinib_1021	16.53658048	28.67204133	30.05541013	11.37609184	25.62533431	43.73385169	48.93926436	32.54488443	18.86843865	15.95669268	18.30300476	15.77300661	13.85666513	18.86395164	17.20351375	31.8095162	39.24048811	19.22597722	10.26399142	16.14639133	58.9373689	38.56120265	23.4905337	26.67343972	22.03705332	30.95802852	16.00280436	14.33037631	21.13197074	21.02633812	27.517155	26.74150362	14.95572141	24.29240724	20.69949803	19.76784467	19.75706631	18.16225448	14.36609228	23.76688085	21.72106674	26.34605391	19.38086051	14.20772489	36.13531907	18.87568994	57.95562806	16.8464766	29.88132282
AZD6482_2169	21.92715983	39.26713993	33.57712486	6.763311892	26.42806883	24.0845209	33.06102664	54.59469994	33.20138387	14.06578443	25.83788921	15.53980129	5.456484552	21.91800738	38.93162411	46.19314073	48.74403518	11.89216794	10.35998609	12.9856883	35.0360412	27.72588638	21.49226671	18.14834772	30.74962914	25.25343993	14.97918676	17.46355825	6.580512639	19.56452389	29.37000037	13.34010871	11.88362604	28.5518397	29.57076049	14.82172745	12.03888673	7.00719523	9.506518202	23.47266229	13.60878942	26.17283475	18.92490186	11.05458617	56.09072208	7.299247436	37.78358433	11.84609097	24.89367689
Crizotinib_1083	13.20848601	28.02275072	42.83774795	19.42828992	44.3446365	40.40855187	50.99511371	85.80348218	16.73251679	7.057491237	15.63028222	20.13996861	19.97039126	14.65141347	26.8490296	18.5938127	61.77491876	34.01935481	8.492146156	32.67130232	59.71399917	26.17882201	20.322365	22.76818555	17.61991022	33.63833408	22.34212698	4.491278122	23.8989626	11.53943508	24.58479097	40.2121004	14.29482144	35.25670346	24.9154353	13.53545996	22.599616	27.46612218	15.34100773	31.05302716	47.75377562	9.056961959	23.81800426	16.59607613	60.62087056	17.89474334	46.48933944	22.04302767	32.90327964
Gefitinib_1010	12.82033674	30.51088007	46.53390811	16.81882676	36.92657458	22.08071187	40.58433227	42.75964684	19.61608732	10.03680241	18.58900904	28.63251707	11.05547383	18.7818212	34.13114765	12.08631999	77.70102867	35.7343994	23.22532495	14.55153808	24.01308708	10.5844122	31.02400893	26.76430308	14.69937726	27.91323254	27.46841549	7.114522283	24.35840913	5.520707357	14.22891754	11.95416193	17.38599827	42.27621204	40.01814344	23.40418694	13.84176788	24.9693854	28.85764069	31.47188656	14.82722001	12.01299317	27.2935933	21.4040118	39.13347259	20.66176385	43.04399542	31.56375571	32.72956753
PRT062607_1631	16.88816439	43.03684882	35.26616651	14.50227625	29.24977188	55.70456078	60.95738659	45.898887	54.58683285	18.60437797	13.71119753	17.75686858	29.41309141	14.16078226	25.35066925	42.2081411	53.42350584	28.00154479	10.54332619	26.87689947	53.71091573	29.45342893	22.70968957	42.58108152	32.40420328	28.35035641	16.12600516	15.68256282	33.26063036	23.43608544	24.8085146	33.97475905	18.77807579	35.68198137	18.57690213	17.66903717	13.47850591	27.89173908	19.0218953	27.78463705	22.39335147	27.29054054	18.10350772	14.06366644	60.34344549	20.11109711	44.12562787	26.89417679	28.38318185
Pyridostatin_2044	18.76533933	43.94870897	30.89494702	18.61926416	33.98353428	33.85151083	50.86217525	52.20862881	26.9213737	20.19403455	26.12891853	22.43063446	26.60681629	20.40926036	52.36246558	32.27960275	27.48886847	27.89198317	17.19607307	39.89260153	23.09029035	38.29468157	24.95075213	32.80015764	36.62776371	42.07643262	18.55022783	8.704963175	21.8284214	32.50525577	40.5516799	35.43110908	28.61933697	34.26010272	28.38277303	29.9369297	31.26393165	22.04864653	18.48516891	23.39725097	26.4718035	26.93919721	26.14439044	16.65525612	43.87134551	12.66913657	62.0275552	16.13371385	29.25328677
I.BET.762_1624	15.23332218	32.67647908	43.55679807	20.28106743	40.21855028	47.25579397	45.28982889	42.91229416	27.49310638	14.43413632	13.09233378	21.13390027	34.69829664	14.84075671	32.04012823	28.17585313	70.60046962	28.57677129	9.943415395	32.94659203	41.80513101	27.02119154	26.28437745	33.69596145	30.57129603	30.6671915	19.09143423	29.1948167	48.42621947	27.89638399	29.3567173	40.82814065	17.85051301	36.07578492	27.9062563	20.04390544	22.65582609	37.4317283	27.63423103	41.29290284	24.34548803	24.22306555	22.8584762	20.24276539	66.38843689	39.14116456	38.97415526	27.80253839	40.04612394
MK.8776_2046	8.830581337	28.67649763	34.78759862	11.33596215	40.31196803	49.13955362	52.26448923	115.4231055	16.56172058	11.70380476	7.212754842	32.58361953	10.2904859	11.29451287	27.27306465	23.34626833	112.1441826	32.59055069	6.650050654	35.56964571	50.45816725	18.01315595	24.90794581	27.44769933	20.80938451	25.15336874	26.44402063	3.070932193	35.0535182	14.94474768	23.43853421	30.64886524	11.46921495	85.19910392	50.197112	15.66035546	13.45101549	35.8684389	27.82190573	39.69126218	20.54810631	6.670259537	22.64669924	5.927682697	124.871031	25.36982046	49.6863756	21.29336732	27.41389566
AZD8186_1918	26.56471591	63.82514431	114.4459492	9.313482758	22.48066011	36.7249405	72.46795027	49.56749856	76.85457117	33.44402319	23.11599097	20.18504736	10.32554541	13.84168735	32.49763504	54.50642178	75.62832967	21.97656365	26.55602201	19.04403448	54.01563733	17.37216545	19.01649273	16.23994695	27.88903559	16.73374117	18.58789653	11.45719052	24.1358387	12.5412446	39.6229357	14.29959861	17.94460944	17.2652229	21.91605199	13.65570752	18.74898119	18.51491043	17.94810693	36.58188907	12.32768492	22.14344994	20.26760736	12.4351213	74.08498057	15.37696727	40.52609923	25.82142235	30.90305027
Talazoparib_1259	7.644236622	51.83462102	90.894453	6.901623443	29.83674849	58.1759875	86.14784123	83.35878046	12.15942079	18.00556981	12.74384853	17.09388657	24.97048268	9.682913335	18.52587225	27.30082413	82.06921777	42.92690828	6.250448314	41.70467868	108.919783	39.43124693	21.60237093	29.27041082	28.73588606	28.09343905	12.80189881	5.386366138	29.79486855	16.75446525	27.85141428	27.98361966	13.40847893	13.7365902	21.19730764	15.99251092	27.40508333	15.59027707	15.93136932	32.55309368	24.21453051	21.36970243	19.55000457	10.31736173	108.3850716	29.30500582	62.17532259	19.70053933	25.81460635
BMS.345541_1249	19.49432803	23.68272826	28.54631885	20.03692424	61.08583613	46.01459573	71.93649479	75.44178697	15.23865194	16.18097026	15.74929793	19.16817988	35.61904678	21.5634232	36.43070145	21.40696035	43.94447954	41.35763169	10.75950332	46.59633299	38.57081738	25.41448461	26.27151165	39.90982671	19.88342866	41.5401263	22.73135849	13.35962904	37.44251574	20.8997228	43.2858178	32.06940833	22.01367226	48.62461159	26.22123786	25.33341409	32.95394371	28.99321924	23.48912979	23.35030815	53.90054423	14.48467052	25.9600822	18.87780371	48.14761375	29.11098972	36.8156601	20.90270481	30.84018636
Elephantin_1835	56.3842855	28.4772769	19.22595171	34.82229327	39.90006514	35.76662311	49.16342799	37.24728134	35.25504949	60.45464271	25.70050181	29.66402566	57.09683883	25.2218782	38.89400424	65.19996796	25.67615415	30.34416754	19.34024246	59.88962648	41.61070039	29.44189028	22.51217262	28.62483235	57.44891018	41.88619428	20.47520564	22.22202357	46.02754557	32.73228403	51.20880631	41.16029371	32.32759887	42.48234291	24.69339211	25.91200418	80.75926069	59.07869242	16.97900274	27.58692872	46.3675158	51.30130807	24.62514129	18.06788289	31.66546697	39.64915479	24.6158819	31.85366866	31.06233731
VE.822_1613	10.2222399	49.22223702	36.04883458	16.39624011	76.60201152	46.81352663	132.9575575	103.5484671	22.09017416	9.708462553	12.66168779	22.06042838	32.67303016	14.20011738	29.57750565	12.70417877	56.70842769	44.96436246	5.026749733	41.99191025	27.04128361	26.53650988	15.8997645	39.29414225	39.73149325	26.43931708	28.2845927	6.912353801	37.79159102	19.00837454	24.46349471	60.07755704	12.1463852	69.04665585	35.33611727	14.29034596	23.01550288	28.89361424	27.16443953	30.60211228	42.88971115	8.590442545	25.15411695	13.25546215	153.6483727	15.57667812	40.92232917	38.33666317	24.46281591
ERK_6604_1714	15.20703888	40.12277603	52.04009506	18.34923256	32.69979535	41.74257655	45.14126588	35.95360668	22.62765394	20.53166583	24.3817541	20.02034115	98.94165663	22.18646191	13.94660358	22.10941997	35.04009496	58.85111437	19.44744389	55.54327144	138.6756915	33.58192259	37.27376787	25.49188914	53.851516	35.71959315	13.73768721	18.65500256	80.17562179	24.66440619	23.64470622	51.38083316	33.04752811	25.02395049	19.17675137	35.1434028	24.81076004	55.34017613	20.9212011	47.77578842	29.72254081	27.47716675	27.2605983	31.17215745	75.44718137	58.50150593	48.92622089	55.30053568	47.73102053
Tamoxifen_1199	16.19988611	56.34514071	40.56963049	27.71292093	56.18367095	42.0593659	70.58068366	35.61867699	37.11019759	21.12298891	26.2600688	45.47400678	31.52839944	28.2590729	46.85977362	29.83867569	55.15763443	41.19170736	21.90494336	33.83401188	30.55589664	37.91513686	28.42410361	39.30466192	28.45799462	42.82116346	32.65318968	29.16363562	61.46771557	39.49224381	27.70562334	30.86710437	34.17574465	61.34356354	38.15041763	28.21351769	43.12264431	47.48534431	38.83704642	39.92860959	31.17645952	26.35375281	34.66745438	23.24715871	53.77352406	59.42228542	46.02390776	32.95892477	29.28846426
Sinularin_1838	34.55006702	30.99928281	27.43540857	36.34855564	48.74851463	24.70668591	55.04758463	65.94008421	29.20827484	22.80378118	29.72557387	31.96548708	37.75110782	35.30616217	49.57524682	45.05681676	68.16501788	40.38218208	30.26991338	30.93918819	32.30015161	23.57858839	28.91668175	34.75824911	33.00750967	48.98239921	26.85143985	13.94775947	47.36043709	30.58621181	35.48014779	29.72962129	28.74343671	57.37112141	40.3773642	25.86110999	43.70725844	45.2962052	29.64987878	24.86467014	42.84644316	26.75986668	32.94795281	26.64309824	42.05663874	41.71225044	37.17196971	20.65814016	32.46484647
Ipatasertib_1924	22.50117928	61.27585848	73.69411885	17.56419695	35.65991609	38.28918848	107.2121948	48.17308493	99.84138495	17.69840739	34.85567677	21.66376488	8.770956377	22.78485829	111.6427491	77.32928691	57.26904363	21.40986603	35.17114131	45.03296173	38.92895987	18.70457379	15.22959794	17.4459464	53.58323666	21.05464549	14.45084229	12.54226923	14.74394757	42.72634706	79.45114029	15.73727524	38.91270346	24.71136686	23.73687752	19.85303207	60.70320562	19.83898022	20.68772124	37.44329686	18.47775674	45.94360603	28.28772155	16.41126914	61.74318564	14.53737073	63.64433208	12.39345783	25.10713611
WEHI.539_1997	8.533367144	37.14108663	64.31554967	34.39574481	85.54665761	50.33580125	46.2729516	86.66398165	20.84236332	9.053554344	27.08370997	46.64607901	23.65151282	21.24308303	21.41502724	32.8033952	70.96189609	45.58036433	11.6044396	11.11222933	31.37129745	50.15949914	31.44079182	34.65508395	19.65248213	49.18372159	58.32622787	9.527199943	33.78182963	30.35043307	23.84613675	95.05349154	16.81057158	102.909396	56.78379477	21.90200575	21.30174577	48.01469767	29.08595746	39.3140636	51.50112926	16.26459702	30.71264337	21.97440297	59.37013895	46.56427159	65.67504921	14.63830086	34.61079464
Nilotinib_1013	31.66386981	39.26402794	29.06854482	43.61517601	66.09241356	44.10154423	57.8338723	48.47737653	46.19217456	23.55431202	30.90460905	39.52965241	38.01000408	29.84107872	69.12078799	82.00166334	40.96582155	34.18275118	17.01536997	34.10091971	12.80804402	30.16292291	13.36704019	27.9010644	33.25827443	41.85743337	25.75448104	26.46470603	58.9291511	74.34721782	72.52416292	30.25045387	37.16933604	56.22072008	28.59214189	16.00532639	55.52966453	43.45610959	29.32360575	36.80118835	54.33172303	35.90600956	27.79479073	16.00676219	58.96987837	16.03310562	48.71267992	23.57480339	21.84709129
Cisplatin_1005	8.905010405	58.60705925	97.72946357	11.08785277	54.93458814	79.84455654	104.1235891	172.5679035	7.132258917	18.64390151	9.057011446	20.99852168	25.62714929	6.971271911	25.30506631	17.26598785	68.71664897	33.28625235	5.537670035	54.97532367	541.6630017	28.158166	21.5690329	19.22537409	20.04843557	37.22634903	11.34519577	5.696638695	47.6068084	10.25731721	37.12337174	42.99453527	16.18095252	28.79172468	29.09507271	18.16161209	29.44927352	29.15566183	20.25568677	36.32494465	26.58976287	9.818748477	15.23748703	10.14609891	143.878388	86.2785532	61.79791879	16.25361952	26.83709832
Alpelisib_1560	28.28380666	44.21256046	83.92740729	16.5820014	37.13899053	23.93344038	73.48955334	119.5674568	90.06289781	11.9188657	40.60610192	18.60806723	12.89189972	29.12610743	76.14623633	79.33294793	191.1342499	56.62420328	34.18597753	73.84782977	31.36306103	8.65864944	27.36244353	19.07374107	78.09148754	18.88331047	24.42272684	4.142588809	28.16245469	37.93822558	32.06338722	14.73080096	26.07588431	34.98254421	29.53420244	15.04317282	56.77730826	25.26500614	23.72751481	31.2609245	17.75842239	21.88627133	21.16742011	22.45339295	138.023277	15.24385137	34.86052565	17.3858929	32.24116166
WIKI4_1940	37.56581298	52.77821696	54.70875385	39.77657745	56.51253276	56.38664716	57.12283225	56.74885181	35.54920974	30.81594303	29.76585003	42.35759887	47.77626168	25.50159637	33.30244482	40.78621874	74.56957151	65.98415829	30.3761585	37.85917433	74.43213992	39.93321958	37.25322346	34.93896084	27.24987823	51.47074	46.31970965	17.89064845	60.90435841	24.05077441	39.08612847	57.89691773	33.03959667	45.1024614	47.66786788	31.91376349	35.70739933	48.82445849	49.07178087	39.80797572	47.23280737	27.54061549	38.17637086	33.16495196	69.36013376	59.78713908	49.75125827	38.69442114	38.84207467
GSK2606414_1618	31.49277752	38.97242744	53.32108467	24.15739198	49.30701853	60.31862896	70.03314406	58.92440955	59.82658456	32.08592744	30.4344332	36.45167715	42.51824435	26.30378124	57.26125448	77.4617727	101.148725	56.44789429	22.52570755	49.10918911	46.49686697	38.47233376	27.05879047	38.05854309	31.2429954	42.9027807	22.3563141	24.71342957	59.50702297	30.62945493	42.76399986	29.10106839	36.78601294	101.272078	29.5023233	24.70979062	40.56242416	38.0144756	30.96736012	44.013443	37.11213569	38.78131979	34.20759619	24.51995544	83.05234013	60.05969493	55.77245532	42.34624477	36.99232208
Palbociclib_1054	31.76983652	66.39871146	51.59746387	14.86693302	35.74056023	68.31165583	110.2241786	22.70593804	112.9672855	64.23743435	33.14159042	25.77210573	56.32864413	21.86020233	59.88735565	59.93994123	37.59438354	57.86974538	7.579700178	94.86054968	86.80913693	35.99617215	29.00170356	39.73330999	97.57339124	40.67334887	15.53725572	20.6812193	130.9401229	69.62532917	60.16937892	20.69026323	48.0981375	40.85400472	24.12857355	20.03657773	52.95543511	58.16108643	23.77631547	56.39267034	23.16902249	31.39871304	28.57558689	25.31351686	94.8678968	66.02711762	80.13541595	56.36663171	35.94603247
Entospletinib_1630	36.31990021	48.62937178	89.12794937	16.73279699	51.58309829	81.78916536	79.29044653	51.49512341	64.83441976	43.10232451	22.99273881	34.41736008	31.36283331	17.87512019	37.90042847	67.06836043	94.15109414	39.7120643	22.292556	60.63055925	117.9890609	35.76172993	31.33549057	46.722166	37.48005156	38.36533753	26.38473271	28.57847738	61.45360501	24.55393216	39.33412208	40.18423299	29.71634245	68.13358786	27.65670057	27.4656153	25.72483706	44.33743933	31.50225149	58.00621478	35.56050162	28.79099287	30.14483209	22.22438166	85.04905168	82.11715462	64.79646807	52.43086939	39.22211963
Zoledronate_1802	31.53118297	49.83039259	41.57018966	36.10963828	64.10072069	57.08607078	70.36945035	106.4838928	32.7976088	24.29265619	30.94846066	41.84757335	33.89118023	28.54946884	71.90130092	52.2131117	80.32669105	49.10356225	22.02437913	38.2023982	45.47979761	44.16654689	29.49120813	50.88165954	30.4210498	54.01269577	33.8990915	15.54201326	59.87946982	39.51774197	40.25511224	48.65864606	29.71388769	97.08167927	46.24866391	24.08835625	36.2706016	39.29477554	40.7038075	37.75482093	64.03602743	31.43731253	35.96921199	24.40021634	77.1478435	37.53797237	49.23718529	31.44484195	33.20442078
WZ4003_1614	20.39921056	55.46254439	69.54636239	25.78063967	44.9097482	76.91646954	87.50469839	51.74765434	77.16277644	29.50226241	18.35336654	40.55789577	54.46105278	22.89041691	32.6658592	42.12540227	100.688026	49.42867376	18.85254906	35.83639662	87.82302365	39.73498753	38.85785262	51.50793822	32.90601714	50.99336852	29.05788398	27.69202607	103.5243687	37.85664152	33.09587846	57.67524577	22.81917038	76.25397223	32.78975387	34.75136061	30.44024646	73.39761688	38.31702178	57.31234686	39.49640932	35.87197686	36.15332589	28.76536622	99.75037512	83.28087285	72.81316729	60.32447124	50.47864956
Ribociclib_1632	70.13541209	59.96878319	48.9946277	28.85913928	47.12085125	60.7033346	67.08366103	55.74742115	71.63414815	70.05030784	41.21834373	38.52012784	34.10402127	36.68731468	48.66758659	73.19433662	60.33132885	34.0465613	27.58164404	41.21745307	78.42085589	53.82032494	42.8432709	51.87813771	56.88909648	55.42880362	35.60699264	57.86527617	42.59988052	42.73006687	60.0085157	45.66366449	41.99039995	60.84736447	39.24555909	34.08829508	39.82525876	42.62549512	29.17308639	43.34723141	36.31363108	61.37222788	38.89827143	27.62944643	52.48838622	58.37096892	47.18274909	45.58755856	44.02477314
AT13148_2170	29.82878197	66.48823467	137.97538	20.69797366	50.49859816	57.02478671	136.7600489	78.36057424	50.06104726	19.10533259	25.14769839	25.80315526	26.0793301	15.9495671	94.98021142	112.8355453	157.2663377	33.79880278	22.29674308	79.84434105	61.06543414	21.49391693	23.58983273	14.01256137	45.23269532	32.71131582	18.0486094	35.53539303	29.3073053	26.63567221	49.10548917	23.10274024	26.88598251	20.52098903	27.99077314	31.00087535	59.37349664	26.93473485	30.43398294	63.18879114	28.9753972	54.07433805	27.36794027	20.29811114	115.1701648	28.1606565	78.84531695	14.96123082	46.66585737
Linsitinib_1510	21.31044297	51.09029669	46.36663562	32.26744085	53.36857972	45.75223762	83.30926154	73.12105549	67.91531265	11.62845269	43.33698725	40.29036686	36.88773772	35.49437013	46.87143548	31.86516125	131.2442712	55.87837232	24.82863007	55.96662894	31.0532681	47.18184412	47.23958902	54.65153573	50.81196165	56.6534416	41.17361824	16.73802027	69.98555269	65.48445289	48.32720501	42.38305749	30.39865711	56.91757575	42.9800092	36.05184259	34.49379865	65.64820836	61.54611684	61.41552614	50.07639086	23.28703758	34.39319342	46.65522891	142.6418004	30.9192023	69.7082313	43.43168759	54.77382933
Oxaliplatin_1089	28.44868059	55.96216487	78.84105398	31.91434006	75.85389149	63.02034665	127.6360484	58.62304402	42.3187673	80.64256332	30.716816	29.08413133	46.76905417	22.23181804	88.33426747	39.31472509	58.08103711	71.96924796	8.569335348	173.6988416	111.5851443	47.7520904	31.00190484	45.62567903	60.73802848	55.97513333	16.92444486	19.96865595	54.71818791	33.27183397	64.9702357	32.45353332	47.05474349	38.03169588	27.49618338	29.37450853	89.0075891	37.49149745	16.68349305	53.67961952	69.67553754	41.34480191	39.79385521	19.38270414	81.55313667	54.82155101	83.69923826	40.83204548	46.6360904
TAF1_5496_1732	32.7006273	45.96646638	20.09811647	60.30756514	74.21088592	44.94897612	99.70302556	66.28918656	35.22350502	45.73160769	46.93308884	40.57107257	37.58564463	44.79453735	97.59770564	21.40989648	56.15748894	49.48188599	39.3172106	57.21039405	39.43787921	30.71818762	46.48435628	48.45938512	42.4790111	101.2855368	42.45744983	34.41173331	85.55814535	34.74735564	96.19734208	41.24023984	44.68702003	91.37131836	63.69864822	35.0291001	86.7185041	60.0973319	41.84866953	43.16571639	90.03752777	20.63007354	60.65184813	52.44391593	56.26268889	99.75654207	34.03533457	31.93163698	56.5290095
AZD1332_1463	41.72066043	49.94484443	114.6993399	22.86878585	43.57912339	124.0344497	78.90394441	52.19554418	85.68647986	44.59639079	52.43310403	29.3317653	95.71431807	34.17151994	42.2317842	119.9424259	87.00261528	87.52726662	26.21507872	96.68790938	103.3163114	57.70084689	27.25087618	47.93576583	32.44651171	37.85028114	19.14372953	20.77774804	83.61800082	35.34433053	49.62665016	40.84826434	35.96890899	43.87702187	24.56015689	38.88687562	53.13596493	48.02033309	36.53206756	59.16503588	28.74291371	35.09473816	29.06933163	31.36319802	113.1177183	55.1031095	61.3801666	55.60685301	56.13739521
PF.4708671_1129	43.8338839	59.36570713	68.91087824	25.1368692	44.87198024	58.90026993	93.32152492	42.20153778	69.33728463	68.85605588	45.93409265	41.38746738	25.84781062	34.1247056	40.2171056	89.80207064	82.2128191	35.05147588	27.98560601	45.41758245	215.4940348	36.89234307	48.49890772	43.52873648	61.64662424	68.54129252	36.3031821	42.87002034	70.68466452	33.98358798	94.86468627	34.51257878	39.46970221	61.95258788	45.49497379	40.80979321	48.03774432	69.29650417	32.93739149	60.51688585	42.9243195	67.89357546	51.73575966	39.26853785	59.51612033	131.0030941	77.60750172	38.67070467	59.48126023
MIM1_1996	26.04754947	86.2802857	68.49801776	33.98621837	88.1505834	110.4368828	71.06570124	119.4079568	24.81908376	22.98892419	48.88508277	56.9414	50.00585297	30.85500039	46.13322224	36.54142863	91.88011095	64.39036392	16.51445195	67.8994255	75.94406625	65.64660171	49.0138223	49.85448775	33.24669296	56.06164088	42.62395816	22.36276039	41.34934398	35.95244505	49.51217281	71.03294279	31.68996346	71.72408449	54.9205381	48.50143013	43.94861942	40.96090974	40.87553577	64.40199143	65.10396212	28.06930544	49.99380059	30.34509674	135.0517925	32.59606853	76.61405504	33.13995759	51.74077896
Sapitinib_1549	40.17889546	77.47700444	119.4549608	27.46825096	66.30524934	21.48691318	127.0052014	68.25505301	76.99815976	41.85183725	51.30040302	48.92783679	23.13733138	32.91155241	54.45570078	30.7898602	174.701475	94.57848509	38.97471906	49.875951	51.57126811	5.113508271	53.54759089	32.26505762	53.01535139	32.50875062	56.19637743	19.7128935	60.03033264	12.42596412	23.26031516	12.02876929	32.40679823	61.06416798	85.16449091	42.10111175	43.58496492	66.67218504	63.8270893	70.83998482	17.83290229	20.10941068	61.89841682	57.73653269	86.89280185	83.08848023	44.78718635	111.8572314	56.21888995
LGK974_1598	40.32837246	63.50352736	59.45312574	41.59878834	88.94224521	64.4961284	140.9022327	68.13681248	50.02477428	70.66743729	41.41853896	55.5409781	42.16721557	46.31034051	101.4167153	38.09079354	112.2448193	58.76191641	34.40511279	83.40908959	93.19944109	38.62196672	48.03078602	72.06122733	50.11884675	84.48726978	40.10518233	33.78572781	87.51032183	44.27651356	97.5544742	41.69197281	57.21033594	115.2398515	57.11564696	36.43536033	82.33230364	96.90148947	40.49038018	57.8224177	79.78636229	38.01925298	62.18361639	33.25090383	88.71245367	128.8755509	65.03372206	33.5907345	46.09824674
AGI.6780_1634	39.43905745	53.21106124	46.14477062	60.30728929	115.8495439	89.70146656	84.089792	87.70956674	52.38624253	36.89375186	50.48420617	55.82472245	53.56710634	53.8959747	69.96929734	45.81240266	92.79381487	66.5362071	28.81743029	76.27819844	63.61818032	65.49626608	47.47783784	72.2102147	48.93873204	77.24909727	48.49002793	47.37396309	81.9744121	64.03136786	62.43931439	73.58975343	46.17267256	122.002912	70.85754645	39.99337672	61.97912015	55.60024124	62.47075832	65.4965801	100.6418084	30.48373893	59.23882137	60.21902781	114.2437595	67.80870835	83.96652936	57.77217165	48.12243703
OF.1_1853	41.45247942	61.12280975	51.74962586	60.24884324	118.0313817	67.83910438	115.0397127	95.75478441	48.42848502	40.2175368	56.04870844	48.36350131	51.61836576	49.63069332	103.6975172	43.92223798	109.1202594	81.73213711	41.27410692	65.29538715	42.40271971	49.54750767	43.77441209	58.53955449	39.04310136	97.42257984	43.09135085	35.60742373	76.51276513	49.78606845	62.52747604	51.94141718	55.28891184	113.419759	76.97613976	46.3710716	103.1063838	47.9699531	54.3734598	52.30507822	90.71426356	33.46635931	64.74206283	59.46208786	94.18735655	58.71442401	56.15687154	49.47860457	51.09110833
PD173074_1049	38.94816882	92.97809684	91.31646751	43.16122629	68.48378988	110.9069298	104.5652962	233.6269253	58.21802554	26.07855751	33.71357251	48.38298163	69.8076053	25.00788933	104.0786687	109.5144271	186.357252	63.18188713	28.53581172	54.76613631	69.65082947	60.15006893	40.01517298	48.77397073	28.00046041	63.64827855	34.63666795	12.99226536	70.08231236	74.43662334	53.84528073	57.4240271	32.35743688	145.5087102	58.50519509	35.92698581	44.97736671	37.20684287	47.83113688	48.28127561	36.54440733	27.34681199	33.95714722	19.34018084	172.2553233	36.10058483	115.5169032	27.54671698	52.42913072
JAK1_8709_1718	53.64293593	73.26215069	88.64692888	48.78524614	86.52850429	109.4980689	186.483928	86.96943468	80.11108338	67.0889819	36.65301339	54.71515526	73.92452205	33.59807919	58.4283065	71.4598902	154.043605	108.3335831	33.24370983	63.64386115	114.8293831	82.60097926	56.28253672	70.34692694	46.85687753	108.7780993	31.98360654	25.94543643	134.4845409	38.58004829	79.3166697	45.28554142	41.5584364	92.28970083	47.46957573	44.5557769	63.19464527	87.39740644	46.7714079	78.83114162	59.3865938	44.32772703	54.95676628	51.90789215	117.9865734	106.8695748	95.7336081	71.03881237	72.8038891
Wnt.C59_1622	51.30101908	75.33195641	57.48620182	62.03375881	117.1350903	63.37604145	133.1312385	75.13732815	61.5988984	53.04381292	62.50670036	61.24942102	65.57350528	49.24254998	118.0899591	59.95119722	80.19634583	70.17638481	39.27489709	91.4557343	61.04054914	61.32719224	46.42002727	76.200399	80.55610398	106.7723912	50.83352308	44.79911269	99.49796766	69.50479127	97.39846168	88.07257544	57.81167118	109.3060094	67.46792895	54.38077184	99.98477205	91.93368555	51.95883496	61.13024192	106.2765502	53.70457522	70.75215226	52.25109224	88.66284184	84.03000599	79.1602523	52.27537268	59.2889124
VE821_2111	20.07944826	72.12826116	121.7568935	31.41086364	102.0377029	175.6498614	266.9851414	166.1029478	50.2540301	20.50492343	21.67300333	51.43111999	53.42760709	26.27655396	61.08025362	76.78341782	134.477917	70.57050127	10.99296174	100.3886625	123.0678164	74.7170697	46.41967631	80.20782542	58.57692319	68.73022718	46.61327267	13.99591705	106.0380907	47.48534495	67.60766951	95.00991104	35.28941651	149.9489308	75.78800665	46.08282347	39.93406798	69.21900448	42.67397665	82.69071634	64.69899611	34.35293281	45.62595281	20.38883278	215.8614522	67.4380874	156.7937394	39.11187432	64.69369188
GSK1904529A_1093	46.1691736	98.47537627	57.47838923	56.16831856	101.6337607	112.0153963	121.8465098	76.65470315	60.54128431	65.33575418	92.42427361	70.00299989	51.73360368	70.72199489	99.35114727	101.694734	103.0919077	63.38286145	38.03927456	151.9204723	54.27220644	96.91243754	54.39496343	77.3789774	79.97732483	90.47333256	49.33602452	45.5040932	106.836151	92.12129337	129.2144061	63.35612783	61.64235128	95.49474837	70.82366096	51.24449819	94.05645396	81.63680082	68.2868176	65.41522025	104.7583886	47.93917038	89.62206503	56.36600047	93.20296438	87.05340384	85.90799972	60.7365246	53.70487896
Selumetinib_1736	30.82252852	72.82308491	146.9803981	21.45527378	70.91777608	53.6290015	91.32151124	147.3956165	126.6162084	74.64587684	29.52621256	39.50073034	134.8322851	41.14899497	34.96701592	89.06251916	117.6989495	131.5981551	61.70012642	74.97396107	378.3809327	60.45029875	79.33016812	51.31906873	114.1805282	98.43682527	38.25234705	45.80077455	130.4631203	37.40619353	74.43423738	104.8648746	53.81710265	59.98572615	27.21365123	54.04675081	34.53735036	98.61298807	26.03377579	74.66759634	57.98676774	25.43759373	48.30862994	54.80949858	221.7838289	84.82048948	108.9346141	145.1760628	135.3240287
Niraparib_1177	78.8078311	78.57242116	126.4628539	34.46952246	79.5221604	104.2082645	195.575522	170.8895469	57.964237	59.28098267	41.31943682	50.28651707	77.99660781	47.45205627	81.67117897	103.1619559	160.7707034	98.0955779	26.63017003	109.3073461	190.5734511	80.77874069	65.10960263	83.74531306	83.15978503	72.97828804	38.05198928	18.52141154	111.5454552	74.41481243	108.1618928	74.8159481	45.33309003	67.5729481	59.27020249	45.17108908	74.93173326	65.4769777	50.26785061	67.38826118	85.10900403	74.52432861	51.0705844	34.23443499	195.2232088	51.5271178	109.5098241	86.09154189	63.72104524
XAV939_1268	82.94876206	79.73793121	114.5924559	60.44471484	100.6671334	101.5271878	138.1029497	111.0131852	71.03040081	63.74433053	72.89443574	64.0509215	80.47866399	47.2088224	70.13710312	96.79569752	156.8888534	125.4120932	43.94113508	93.67199777	166.3928303	62.75599713	71.00813805	79.66100822	62.06575994	85.54202937	69.22615993	35.57636898	110.9764404	50.92804409	85.98431733	102.8135169	53.3921593	94.87112855	82.4761506	53.76538165	65.3203587	77.48068323	69.89605571	70.68292722	79.54632825	62.43739726	68.7796961	71.71189004	119.2343866	128.8914722	108.2012163	92.52709378	87.54217633
Olaparib_1017	36.36303695	114.5355804	158.7740132	35.64429692	67.4130191	116.6046829	203.7229401	213.1946879	56.86710271	70.39001513	48.125862	63.74729748	69.92678295	38.50124682	75.52420159	80.84551478	257.8077595	96.97284105	32.46223069	70.19935561	247.9209457	84.35994116	56.70569565	82.59175042	52.1881061	68.8036413	47.09072628	21.94903919	107.6267854	62.12528837	101.4913778	73.64779023	37.86010507	97.5584375	70.47022882	41.71566098	79.82354885	67.86991828	50.00200949	99.63951379	73.35794236	49.33920226	65.00901823	43.26794733	231.5506078	111.8467411	138.3124722	57.61492591	64.11157803
KU.55933_1030	70.95911294	116.8936686	175.301557	37.91667568	88.33294651	164.0558532	110.0931844	172.0905266	79.99209242	79.09388407	57.85991445	69.60429832	34.11588646	65.4567409	59.40857215	123.1342489	288.5355832	59.0617715	57.28623358	36.72024163	172.4334644	117.7925896	82.191964	73.17495538	53.63073924	65.48869451	71.52321946	86.10621726	49.12863704	50.35886494	53.58434488	69.4713469	55.37646514	131.9409217	88.78650233	60.19389475	36.6464076	44.03332953	57.7058196	111.1720896	56.34961914	60.24597459	61.64001506	53.44197551	199.5348053	77.53716588	135.6114365	88.68923213	85.52511961
I.BRD9_1928	39.21939171	99.24226027	71.77649777	65.34093798	124.3393792	125.0591342	179.1875452	150.9449338	60.76630972	40.93146289	32.86178074	75.26390984	64.94468559	49.18086966	106.6361734	93.93013756	137.5493608	94.49346206	35.40756225	71.79532214	102.7440919	76.40578104	61.50203894	89.17639761	69.28077157	103.1613931	64.01579529	31.58333952	143.1474421	80.50700257	80.52268369	99.25447577	56.98652317	152.6452249	103.6931604	58.63011209	74.09168338	88.60884354	76.19773086	95.32094252	82.47520852	46.17015726	71.27141231	54.25169283	143.4822203	89.34000762	147.245676	58.519643	77.92999143
KRAS..G12C..Inhibitor.12_1855	54.37296451	83.8772793	93.3377193	46.93791304	183.912009	113.6911597	182.3069206	124.5706986	72.15087938	58.02747659	43.81454726	47.38420255	60.12266685	61.50856642	112.9446679	118.1796338	103.66122	117.7387903	25.95747762	127.3366503	63.62531629	73.87868006	45.01644303	72.95241903	75.85837221	150.1053736	37.67371739	36.69030708	100.6638354	77.58695798	82.53597023	61.73234849	67.83086359	148.9460867	76.76741693	52.9896047	195.2562867	54.15163957	61.07222039	61.7681274	107.2829604	75.79941376	66.87387607	50.6023775	149.8668259	52.27615133	91.67726331	59.45964255	59.53144168
ML323_1629	67.84770206	80.00888101	58.9640679	92.26220362	146.2116345	87.1712154	133.4227712	97.69941353	68.421882	70.21958971	80.81362145	83.4265277	93.61926507	70.21359898	154.9820327	69.48571232	97.81032974	81.14364049	48.41845165	117.1995678	76.12632184	81.64777777	62.7263959	89.15922502	85.96387818	132.9069756	71.63154007	74.01565856	125.2387152	94.97499219	115.8018158	107.0504687	85.77074295	166.2103545	106.9609968	68.5195695	147.4291107	106.1195452	80.78070864	83.78610937	172.5215371	61.35253671	106.6070036	82.76016657	96.19262166	124.0113305	87.89474831	64.84127616	67.96013681
Doramapimod_1042	123.9184798	100.9588348	50.55626384	100.0163838	86.40346788	88.8860204	93.62885678	139.2307691	152.7790719	74.62521397	96.12275488	77.07253111	56.26076569	104.1605451	139.4394551	117.7929146	104.2669609	80.07605192	96.87879403	59.5997158	50.42229298	93.04649305	82.82648237	92.09467345	107.2942676	89.56981864	82.85035654	106.1383192	52.52307558	121.6481171	105.9398376	87.76743382	82.14579248	100.3613525	94.13860333	61.2186788	91.51653014	61.92891764	74.19317615	67.86921231	94.454356	116.3269565	72.61221893	74.15190749	99.1306114	38.62438367	92.97087218	83.98004065	84.22842982
P22077_1933	50.9553949	122.4553333	104.3547163	79.43465792	143.3063627	89.28719187	120.7030916	134.4791932	71.51075398	63.92097573	52.49180218	104.2255433	46.40357897	63.64063166	163.4434839	136.6186261	143.3945826	92.50332512	55.14616659	97.36870281	61.38854435	71.90948637	71.04391886	77.55135448	61.37057346	117.9026656	60.12118362	61.77834298	116.0991207	48.24156568	151.7448143	34.92067638	103.8547911	128.0868251	107.943382	83.18964048	193.8595059	156.7248138	79.02658302	77.93654365	135.6378117	99.23051462	84.01292654	39.45371625	135.677528	83.84966232	63.12742934	35.34886967	56.6959601
Fulvestrant_1816	92.50716418	94.3394278	45.39563894	118.8974445	127.9887773	77.38029657	137.5769467	85.4425398	90.19691166	76.75898116	121.0534415	80.31442114	134.5213439	93.4010895	163.8213892	101.08787	82.5641228	103.8502525	65.79581754	188.3420711	58.22063413	101.8630664	65.22921369	113.0112458	138.6768116	114.3564432	71.31869128	39.36150851	148.4179845	144.8502569	130.1728594	118.3817396	112.7712541	181.4826444	96.35114107	61.7501068	146.719472	113.8007984	75.51049208	63.13114767	136.7650948	78.10557244	110.9856913	69.95137699	97.48028673	98.99412594	82.16574274	80.38990383	69.38221129
PLX.4720_1036	33.09166446	161.6833527	187.2650275	57.1878158	89.82757973	151.9585405	206.4895271	149.057008	160.9055807	97.248446	40.96472073	67.48485748	66.45964663	58.56916998	76.7568822	118.1612815	209.529131	140.1664365	38.71545895	68.04092749	161.3991305	81.55419231	58.89029934	118.2361249	60.55787122	93.37117013	43.99205869	76.00413478	192.3589519	63.47949525	62.160583	83.72751294	51.19552855	177.5142526	65.82076175	43.16148724	51.18457961	92.48155287	48.51130941	127.7268163	76.18932036	47.12232841	65.74126113	46.33903013	227.8077788	102.6198963	196.7701184	114.0823992	110.972524
PCI.34051_1621	64.39486406	93.19029448	99.43233555	62.68874221	93.10670264	129.1235222	124.3306826	162.8233925	91.77966069	47.46708343	76.27598377	64.25134745	94.36523418	54.90674876	115.334209	116.7566933	262.5171788	134.2868673	42.98012455	114.3402684	74.54196918	114.1330616	65.92435443	95.36145556	83.91649297	79.39140818	58.96262626	57.86101782	76.51334133	105.499411	100.8470786	103.7043121	55.20946021	134.8634617	76.30127291	44.67220247	90.5955772	49.79979724	66.74747375	75.33961617	113.2210648	70.62842809	60.2179875	49.90200642	195.452667	32.21619941	142.5578457	79.7268021	85.1878676
BPD.00008900_1998	65.69420549	122.0636952	135.1113673	63.80816588	140.6029021	157.1797638	157.2886174	195.2424448	51.24894441	61.77323122	52.56865764	77.8874746	88.37666772	67.51854069	119.0796958	142.4908239	202.8852342	103.908619	45.43238285	119.626413	134.0999132	90.77164599	69.38930803	96.79302311	68.35281528	95.53545815	74.84234531	34.74873763	143.1182691	95.50489935	59.02145167	113.4600477	64.22787239	151.5844886	90.725339	75.17829818	93.14446047	127.759945	79.97464424	137.1382055	77.75123051	54.66928062	77.71122343	65.02752402	179.5924912	91.06900837	156.8705383	85.52822773	91.18626075
AZD5991_1720	62.74679085	34.88197669	50.0452419	92.11217637	167.4320393	78.4708367	131.5410686	348.2401138	62.09888554	10.17220671	14.2729773	108.5898439	35.71690762	38.00636544	240.4274943	52.53975355	242.4078055	77.3849344	15.84425121	87.24042223	24.98003711	36.9512081	71.85283802	70.87813716	18.24696067	117.0684692	142.3743475	17.52408986	179.5010061	40.5509824	78.77712129	97.89804751	18.01283544	419.8135119	145.5657755	36.08834603	126.9841055	130.9228682	107.9560677	44.48339238	160.4131216	8.86520008	86.41280059	34.7392821	205.0874206	45.043926	67.75752258	56.8310224	48.43754906
GSK591_2110	62.69854018	130.476874	154.6680025	51.8872073	135.0095109	150.2596631	222.8602845	172.209934	71.99258818	67.67365536	62.36193163	69.44089959	78.85880916	64.47659301	129.2432087	142.2348434	188.1457536	75.47933946	42.91656308	179.0266043	130.6963155	110.4000743	72.39208126	100.8193568	113.6122664	107.3076224	76.44539067	71.5092571	94.8272871	89.26370879	104.7142414	99.69657233	80.85007409	97.05493721	102.8117087	93.38853735	116.9726444	72.59005449	58.74869393	112.5700398	71.56551444	86.01811618	83.86388186	63.74825205	172.7887963	86.72324771	179.9464433	73.77413685	86.84345319
AGI.5198_1913	88.93457665	116.2325176	106.6663359	79.06042898	138.6755964	179.5988299	184.4295576	144.0177093	90.6405009	97.2458314	72.32930833	118.119902	73.47750014	84.04895397	127.0495138	110.2600971	197.6087601	116.0239141	64.54698295	106.7811128	150.4853737	103.8499794	91.31735123	92.78137327	77.72527322	108.0207786	92.01026308	82.86208739	146.7876873	80.27002754	111.1754677	95.02452314	91.58799726	158.2358199	106.404561	74.37518466	121.8426271	114.730547	101.3994503	117.7613393	121.7565961	94.74702161	111.9539856	74.93003531	191.123796	175.5307724	137.7789228	68.75587308	102.2494376
Ibrutinib_1799	56.18140185	103.7890192	235.0130384	42.59706377	151.4192573	48.00243975	249.9743972	338.8841232	81.96772995	25.88762289	67.65921608	77.79884855	51.09311803	73.36448372	102.7959905	95.41769262	399.7324697	120.0683888	37.15973603	57.19124024	109.9930779	18.60883557	68.20349794	60.57896211	41.09812742	104.5049204	86.38888189	17.46000303	107.8958456	27.77017851	34.26721128	28.11622344	25.81318469	200.2262102	156.7858255	58.98849463	92.78612334	96.11690622	111.1096146	95.99014714	36.89013803	37.48761255	101.6428598	80.44036691	243.6991966	76.760853	108.7057129	129.9785547	81.34847957
PRIMA.1MET_1131	256.0285206	169.4894618	71.27967653	129.3545869	114.3048557	143.3393216	118.3329403	132.2387152	229.3138766	168.2432339	90.66925332	82.8439454	134.1611564	63.47714352	159.8268382	386.5142449	67.44016398	121.4152105	46.63058197	183.4633315	90.27730534	50.5239687	54.25929619	118.7805397	228.2571609	90.33809383	60.28711073	75.71350141	135.9530268	116.2571942	206.6005904	185.4871838	87.95593917	60.81750959	54.76170688	51.06832932	210.802515	155.7900318	49.28850378	41.78508807	141.0470817	178.1719736	49.54943712	38.08567318	136.4561585	42.64527279	73.58624492	95.10838206	90.69304872
Dabrafenib_1373	67.17222417	147.9163583	155.4748148	50.947192	122.3779943	144.8616675	242.768204	104.9054387	159.506951	86.43416896	72.08027955	93.59757132	105.5254708	89.60700666	117.9792334	174.6421855	191.9606252	149.343841	34.57262677	152.9524681	233.0237902	109.5117966	73.92007211	180.3661101	107.8642579	122.403039	48.88854378	74.59251947	262.7672332	119.677883	111.3731102	81.13243029	95.46006764	196.039494	83.25178621	49.23696992	112.4089377	146.3824465	50.15369188	172.3966198	113.8917884	117.9524843	85.04833826	45.15485171	229.9379067	219.2929251	139.4195822	130.2418378	126.263391
MN.64_1854	80.85796078	108.7850462	125.016273	111.2930777	176.3958097	116.5758446	158.7564559	299.3987151	156.0239547	56.90109079	72.75095413	100.6660501	83.16593241	75.57406911	187.8948806	213.2879879	274.2611206	151.022494	67.64230958	129.0720987	107.4572947	79.39055452	97.87534634	109.3905213	64.95265079	176.4470489	102.4450452	41.41115982	129.8464221	73.67749321	89.50569118	103.3362428	85.00121341	186.7943301	142.1228996	72.94824487	150.9609014	97.37861254	118.445945	74.83051908	108.9249959	84.28186912	91.0685936	105.968059	212.2204364	66.69612055	110.7854815	110.0992323	77.40530019
RVX.208_1625	88.15655152	142.2109107	152.4906347	97.33367287	134.4597235	163.6268185	158.187522	244.6081644	114.3878504	77.28886167	66.98943065	89.71910632	99.83903232	74.02886419	152.8030845	142.8395658	330.6292807	108.7371788	59.31197448	126.6007592	162.8946426	106.8446921	113.3366978	109.5226924	95.72791185	121.434845	105.4274871	76.28530512	146.835922	108.0750778	116.7330628	135.8828833	81.06278653	194.1111979	141.5084354	68.93276079	95.22058297	107.2124954	119.5150542	127.8925369	98.5361283	82.61165295	94.19870251	77.96675548	239.5101585	153.8759347	120.4308081	103.4646975	106.5201037
Mirin_1048	61.31514776	123.3574397	148.4271029	62.65612169	199.8634401	265.4886457	263.8545275	101.2701762	83.17279454	123.1746394	79.77664482	101.111428	136.7181651	73.10847165	67.45100937	118.3595486	176.0879501	234.7002676	43.47611817	204.0733157	238.4828181	96.10967522	107.9377554	140.6110427	80.36018492	145.4702557	87.27930141	38.57011754	416.4336242	64.83896143	115.8895153	160.1661858	72.39071437	202.3679756	95.49639011	94.08740321	124.1121683	192.6872675	103.5267577	130.3028498	160.1345794	77.54306845	125.947406	72.77766957	191.4444866	234.4914302	165.6123657	97.45381109	158.487352
OSI.027_1594	119.9532805	59.03044766	146.6876931	166.3642435	209.2179389	73.46878834	256.1744065	49.05941894	142.226259	102.2025835	129.860072	129.2155517	140.1491293	105.6973484	118.1645872	169.8510247	136.6581417	111.4707579	76.04612674	140.159855	130.4942723	47.99271387	57.87966712	51.3503734	140.2844586	124.9200353	121.3279067	58.90300523	211.1256133	126.6979754	188.6019044	92.32919172	105.6669082	103.459533	149.5340578	116.8956531	240.2969084	312.3927183	109.6851601	157.260581	186.7165454	79.50251818	172.0739596	235.2604335	78.87133837	434.6010583	169.9010257	111.8908193	102.2120208
Ruxolitinib_1507	140.9189349	103.9568791	133.2696151	115.8168884	183.0787008	158.0868401	187.0471901	290.6861205	103.716019	82.88023902	93.4528643	86.98530753	102.0876048	89.18333244	193.8257395	159.8651654	364.0734387	153.4259662	72.99372592	159.8688887	144.8831168	105.4948407	85.18765474	123.4519665	92.4630791	135.780583	90.25447046	59.57869609	98.04174367	87.8553657	127.5763697	142.0642619	89.02406562	221.1310557	139.1094135	75.91367649	121.1767967	94.80196729	96.85123989	103.9321859	125.8063911	90.61273203	98.81825688	76.24525997	231.9944184	111.3270328	162.4691217	80.71234716	114.0294494
Nutlin.3a...._1047	319.3767267	179.5622185	314.100498	50.45834292	66.64883433	215.6684527	179.6595242	129.4499457	278.2882195	285.6277091	93.85173972	61.39999617	142.4425652	49.47209768	162.1197115	192.9887492	255.814856	211.0581398	82.20210107	161.6679733	198.2152233	58.9822618	88.58233688	147.1920078	183.2328493	86.06375861	30.54626384	28.82392427	183.4564731	150.2397025	226.7741711	27.72961845	71.56706935	41.04224208	40.19444559	71.22941811	201.7920608	69.55294814	64.64453934	137.5716573	57.27958946	113.5841593	74.82493946	58.5379978	324.8408581	35.05489041	209.9641763	225.5334115	119.7403833
GSK2578215A_1927	89.74867083	154.3630568	141.9137339	114.8236446	184.45779	188.7500741	234.246486	190.6481052	110.2202748	85.31188004	85.47452386	144.3154497	118.9234644	96.38130941	186.9885333	188.2395921	217.818239	153.3424066	80.90994966	152.6378953	108.8712262	133.881997	103.093462	136.8232783	95.7094886	172.30478	123.3673576	81.08894669	207.1206031	127.4111467	122.1921177	148.4271687	104.9042176	210.9619533	172.8613417	125.3537287	159.0799121	145.0906338	155.3752944	142.2724923	127.8011668	109.5385851	134.0781958	96.81901065	209.8481598	129.1410359	212.5951383	98.83704227	132.586847
GDC0810_1925	99.86438044	157.6737124	143.6961496	98.40231509	170.2451304	141.2505861	239.1867823	139.2645953	134.1224151	91.02216875	111.0931578	148.2141164	122.6235263	94.42785796	160.1002761	160.1259213	194.9673786	135.3963658	74.92483282	206.2662307	115.9409772	149.284068	108.4726686	107.7277019	125.2900202	130.753417	110.121923	109.4901014	217.4794437	160.1675268	170.2686459	119.3462384	112.7897959	173.4286472	170.7740594	125.0668928	220.6970966	170.0235743	146.4553747	160.5934607	135.7536678	124.3728654	156.9541992	110.5085485	179.7608247	235.3165834	163.190452	95.72023647	115.3616897
AMG.319_2045	106.3929613	226.7118617	172.9728527	100.9772857	211.4211375	275.6088073	264.6369793	354.1896212	160.5840005	134.7339566	63.4490853	111.6168925	69.6458981	61.67092115	165.4392164	170.8791404	267.3593294	127.7745027	53.79786396	96.88477755	160.4780967	137.8586155	93.00344424	144.3903724	95.02781276	197.8010687	117.3694086	65.84998322	127.359024	84.44503866	137.3263736	164.8653888	84.34408773	228.388844	153.5697482	70.3322334	88.821793	114.4140189	92.86033668	135.3920832	118.5358789	115.1358851	105.5126009	48.67905552	280.9532748	63.33208323	254.3933257	91.32810939	134.1855697
LCL161_1557	121.1217829	133.0057387	177.7718506	105.7893757	191.0340984	98.01556902	183.3120792	255.4190495	123.9250938	75.74795217	88.76451017	127.0660595	61.57491742	137.0998436	206.222792	186.7221609	447.0554737	142.8415302	88.67452534	226.2805329	93.44881498	97.25649469	92.14010468	135.2574489	138.3463058	109.0570469	106.5535921	80.31796345	61.16164092	95.1697453	125.0838351	100.302445	103.8452029	210.5030568	187.0126643	110.1013234	204.1857881	116.6924713	106.1761062	131.5493358	120.5759485	150.8839351	139.3767348	125.1921963	158.8855761	118.6232043	132.5177123	105.947893	111.3271503
IRAK4_4710_1716	93.40675957	162.2904409	150.2443442	112.2716925	213.548407	206.8244725	289.2497144	193.7230933	79.63200803	86.79981028	95.82899218	142.5998019	172.599257	88.47226227	145.3399452	123.8792716	268.34913	188.7313295	72.52512028	158.8080673	270.9329663	148.0439433	127.6986604	128.1620422	70.83193802	207.5844725	112.794247	64.39675452	256.7051561	81.29773614	122.1135715	130.5487725	120.0279133	238.5900202	162.0913891	123.0873019	136.1512674	180.4532	156.6368786	182.9334786	207.2500141	82.13492715	137.0574278	129.8313877	276.9349447	278.7307086	187.3809162	109.6890273	120.8170963
BIBR.1532_2043	89.36878584	149.8274015	119.2924335	115.0269263	204.7244545	161.993735	248.0122199	246.8648486	152.4667077	78.59818695	108.4391047	118.3896845	92.83882722	104.194851	213.3697675	156.0891925	317.4924517	146.7465773	82.49000714	110.7614006	101.0172367	133.3109741	103.1968946	142.6165182	110.3080059	155.7407305	119.1764636	69.66576996	156.5438952	144.6191166	155.3936179	101.9794972	103.1081679	186.1318724	179.7571171	86.73406002	161.6267543	164.9522341	133.9887511	169.2692657	171.4946753	118.3124948	137.5838397	96.79609993	320.0431608	89.42558673	182.950153	111.0731748	137.6046693
Leflunomide_1578	124.4550516	170.5601124	155.6258962	109.94835	211.786331	196.7564067	255.038877	179.6485892	124.4001816	108.0297709	138.511203	124.6310294	205.2390592	101.7118575	148.5933964	147.1532001	173.5574932	163.4124875	53.80799498	231.5377592	220.9176883	135.9195361	127.1010524	182.8209585	181.1368173	202.1909926	101.9421015	99.98668335	212.1943357	131.4552495	161.1761159	187.6933898	104.576462	207.863736	151.5983395	111.7424267	166.3020126	158.7862506	123.2096427	128.7614616	235.2860246	126.5070521	143.7926732	111.9047456	228.7197981	227.8556877	156.9765637	159.5696835	131.8323124
Acetalax_1804	337.5022789	36.94222694	73.99752325	330.0919796	251.7593191	117.0703418	189.4896017	163.1943432	381.2464513	211.8337123	435.6331736	198.9995634	156.1010042	145.0069804	116.0151845	324.2348568	166.2693142	136.1226329	181.9855914	77.13068552	41.39096556	48.80698766	85.70577962	18.65911615	164.0930479	113.7977665	136.0368601	77.30276898	279.71228	85.35885651	238.5265064	43.92646763	203.4802544	123.8826352	153.3148453	94.50243314	224.7610387	244.3580637	186.8693749	79.32047529	216.9001227	50.53090931	176.9103696	103.4154276	196.7651787	165.8932119	75.84817262	177.7265183	78.08461929
X5.Fluorouracil_1073	104.1460939	137.0770682	279.0670992	41.31767088	351.1998577	276.4074593	477.4583077	156.7007075	85.32237888	297.431835	64.63314849	86.97866291	165.2172317	44.05114669	134.2664589	141.7663853	111.0477944	147.0991217	18.13033304	838.1382847	1396.943671	85.04627331	59.32341662	118.3000311	362.2448046	244.2043276	47.67286254	12.60108681	537.1803072	66.74069128	215.8687564	161.5332111	177.8593264	166.6540576	66.3775556	87.40612035	204.5987661	254.6350258	50.70709196	138.4639614	131.0366658	86.87193876	93.55533882	52.73161649	179.452095	748.7782114	276.4174517	147.9024128	100.5846178
CZC24832_1615	142.0048431	202.6359195	237.818199	117.3316326	210.3376541	185.4999609	248.6718145	328.8493301	181.5449386	102.860916	95.43677926	151.1740068	109.8275806	106.0654727	220.7813393	242.0085874	328.9886224	161.3210508	86.74007758	165.1541611	269.6940813	127.0358691	119.2172147	194.0812674	118.2865004	199.8869592	140.2382922	81.23492881	180.3142497	104.5209657	160.7064469	185.5102018	102.1974771	260.6863159	161.5537583	107.038331	160.3942665	172.0599841	121.0547829	171.1102918	161.2440381	104.6825292	114.7688745	85.93178341	257.2913338	168.6760532	214.5405041	125.5874008	148.4330667
Oxaliplatin_1806	110.6485241	168.110378	288.3281688	109.8985028	236.0170844	224.5515969	403.3377297	196.4753062	120.0918986	182.2039934	156.4149236	92.72467791	303.5845807	83.78617896	207.0930935	227.3533479	259.0143524	306.1082527	39.45576036	358.8639145	441.6048177	167.6752767	111.1446542	142.1227337	159.8736141	194.9601166	66.29080177	53.6164045	277.1937448	130.6174656	173.0285409	141.8637229	127.840348	130.4920135	111.3096416	92.16527757	171.5306887	145.2136448	99.56917389	172.662862	260.1917021	78.80073746	135.8421447	102.3783134	405.2042826	135.0971107	255.2304673	214.0314235	175.1377345
Fludarabine_1813	96.59685748	254.2503883	284.5934308	78.68818818	295.8060824	254.9710702	445.143226	313.716835	150.3211286	87.13337672	51.36133144	122.5004531	174.7932404	66.53508817	158.8205272	269.2113761	324.345812	216.2104477	57.7313198	124.526298	246.6359825	148.5658311	100.5509999	114.8365912	125.2335064	175.2633369	98.84746212	93.35447815	229.7800945	144.2348458	133.1855593	189.5327734	115.7338453	232.4351605	159.2691097	74.1685513	73.82682539	138.8651264	140.5254742	204.0224558	211.2485645	139.3752118	122.0578329	78.66807601	656.846336	161.6270992	291.9318703	149.0172145	121.7894898
LJI308_2107	103.8047604	208.9221713	267.8435612	111.6909612	206.51089	329.6923818	327.4365688	312.2911317	195.7115569	79.84104032	88.42293132	143.589958	129.1818059	94.99669757	177.6443574	190.8167633	330.9337639	195.1585019	87.21748827	143.01952	237.7598289	170.4631704	160.2623105	168.6893973	119.7761218	200.3429127	151.1786341	89.28090478	243.3501285	131.6440601	160.4924331	179.9100827	126.8900619	212.5603616	178.2063348	103.6100937	133.8814364	145.5546992	158.3770278	205.4479078	162.7565298	154.0245926	114.9517428	87.35929585	330.5981475	110.0348878	272.6747333	151.070942	170.2957686
Picolinici.acid_1635	174.5600288	166.9132523	219.2683582	136.7247659	193.801993	211.7236709	251.2452289	313.500649	195.0780067	114.5322833	134.5279521	158.2353293	161.6312312	120.945572	247.3187488	187.7092734	302.6062453	163.4643734	99.60818362	199.3069012	197.0186675	140.113409	117.2677993	181.8282875	148.8307113	176.6706717	147.5680742	118.4247366	169.9395955	141.1340468	202.4269858	165.2367366	121.8233871	277.3772861	166.6018813	108.7322103	158.5938293	151.5215268	150.8265876	173.1393117	182.3013515	125.0666348	124.8111311	116.0198854	300.1067516	149.5525994	199.1824616	155.854363	151.2995741
Cyclophosphamide_1512	113.7589264	228.8651945	180.0511311	121.4316299	221.8986332	239.8300355	300.3337835	315.4763618	161.8235581	129.2252589	105.9406066	180.9500871	99.33000158	118.9715768	257.3232319	202.9622777	357.6358439	162.1002193	112.7367183	160.4385198	154.4230273	163.0758808	142.46599	193.1417706	162.5387594	218.1775035	133.2106313	105.9067427	221.4507292	178.6504214	191.5306199	158.3153407	130.826218	257.5855291	203.2368218	130.1762253	191.4690427	174.2262317	160.2292869	190.2513812	162.4728155	135.5395283	168.4114504	107.110976	302.5584801	145.9907156	252.9352634	135.0417353	137.7182022
EPZ004777_1237	119.1505824	180.1768563	238.7544729	118.1783725	215.1092464	214.1385248	399.34771	441.5446887	174.8196523	97.99265425	79.67879785	156.0647781	97.74734364	111.34509	279.4522749	202.5992633	441.7637649	182.6902445	94.65062844	190.476141	234.0055339	144.0077902	132.4961646	187.8761968	121.5918808	218.4584676	147.6460965	79.12963228	207.6821584	181.180854	209.0753495	158.5388683	106.0823185	285.5493004	173.2338905	101.823985	176.1690263	167.0525656	134.0691113	165.6750692	200.794031	108.1632627	132.2836211	88.39957233	372.8809366	140.3112246	260.1474531	95.03667295	148.6028173
LY2109761_1852	131.0569838	225.8323496	146.5359715	170.0908995	249.6377351	203.0967159	228.8738359	371.4159425	200.4644032	85.73313892	128.3445631	147.1891417	110.4042965	153.2056167	225.62837	226.3589176	488.5471115	220.6695418	122.9055338	117.6474245	121.6952061	196.0026277	116.3751947	205.1005322	87.93723044	253.1284632	131.2306609	67.55495515	214.0827666	121.8970496	161.6936649	158.0472519	125.3188023	425.4090373	200.4320336	96.22616599	128.1964291	132.5238087	171.4231734	123.230843	201.2971213	143.1701386	132.4301136	96.31927538	317.1115494	101.8151334	151.9387899	121.6924056	135.7060824
IAP_5620_1428	217.391369	166.1107759	320.2106896	111.7882309	302.8521471	135.8698038	279.6451951	337.2385398	88.88602833	66.19964463	57.79187656	150.8523303	120.9666005	133.3807687	193.6272813	358.6237971	885.6712738	206.8257714	125.934077	174.424078	114.6045743	187.096904	94.53310143	141.3513853	61.35356372	208.9804244	137.682852	72.75831329	101.26806	110.3266717	128.2447175	158.0142813	101.9376701	218.2486625	223.0923547	155.3832141	239.8748134	167.470626	117.8331537	170.6131204	164.9860629	170.8185068	175.5437908	129.4124623	247.7147705	182.0808307	152.8336483	65.00749704	157.993399
PFI3_1620	147.8757284	192.5085351	220.8484582	159.7346769	254.9448357	227.5898866	260.5700272	377.864873	157.2300546	118.3924291	117.0794604	187.3245369	148.0042526	140.5233907	242.3821251	239.8049842	372.5993264	187.3672984	96.52256909	183.6819812	211.9214112	182.0842841	147.8762342	206.7655979	119.0444885	207.0909368	184.0852545	127.0047948	213.1915394	166.4359844	179.4980014	234.2302722	129.4126278	331.3383799	220.5459782	140.7619445	178.4636841	184.0488596	179.9018158	198.4136789	219.799969	129.8140341	160.1689392	121.527682	321.3143765	159.5226038	245.9180449	152.884162	166.7165418
SB216763_1025	198.9144132	250.5069291	261.5454858	127.4601303	196.8711543	270.8526341	219.2632057	383.8032674	211.7241567	166.0274948	167.4732288	166.9282059	143.7506111	163.3233926	188.342852	289.3811805	360.5194653	182.0895486	140.7168412	134.1865585	196.9448448	212.3260779	190.634741	216.5094199	168.1464655	186.0075043	162.3132466	194.7706787	135.8856623	176.4238549	141.465834	195.8485809	163.1925119	201.3989441	188.1120859	151.1501814	126.3395558	117.699387	168.3599371	190.5415408	165.2085683	210.5108817	151.1235702	138.2242072	338.2441229	106.9181858	281.013651	230.9766183	190.7142928
AZD1208_1449	162.9670167	228.7731437	174.3746706	217.3815435	274.7180703	226.2065764	298.4103525	522.0220725	204.0012233	111.8264643	111.3466988	181.0754311	156.3723162	144.5665841	317.0689382	172.3376329	390.5037533	261.3171355	146.9607427	162.945437	176.3870452	199.1048343	166.761327	244.4260507	120.4873505	347.9339024	180.8004912	76.01188219	324.5861641	171.6303452	246.6554069	221.5298906	136.0299026	399.336708	220.3835008	125.7369182	174.3818058	196.7557379	186.912407	171.1726932	250.5924378	111.5458638	150.093602	124.8132228	386.9977405	128.8897307	235.0870847	125.6022506	200.4232938
MIRA.1_1931	161.1933159	309.3088012	206.5269408	190.654435	371.0914745	307.7627278	417.4890271	542.5140846	212.183903	141.4901003	115.9774749	213.547863	148.8280384	139.6222562	415.8185529	277.1517793	520.9511931	225.5493738	129.2210305	256.1557785	255.6877854	169.099939	157.6379527	246.1733158	209.7282735	341.6621751	155.5900323	68.11106664	333.3132286	221.6951435	276.7027955	244.7017265	165.8608325	385.6726687	287.1143917	142.5573702	217.5422763	261.2980873	199.5131313	195.5746761	218.6117287	150.8468319	169.608905	97.84523944	502.6637631	153.7789853	375.8854378	103.0806165	202.569994
EPZ5676_1563	199.5089433	265.0334023	430.0649848	207.3293947	350.2835193	294.1012864	387.6923606	646.7760051	219.8258979	138.3189414	130.4276987	232.0665819	132.952698	180.4696892	433.8464298	328.1482569	756.2509857	222.879577	146.3221418	249.0700792	318.0788837	187.0807991	200.5409212	288.6080068	171.0485128	273.7854054	208.4254732	130.3679114	280.4403369	200.8787551	283.3692098	176.9887915	218.9110108	494.1233897	286.7241078	162.4350413	276.3533734	250.4166063	186.6852719	259.6762435	282.0337952	176.4740816	228.2111835	135.8852004	511.4244594	207.8368197	357.4410746	182.0675763	233.3826758
Nelarabine_1814	369.1033429	564.2961347	575.8204368	295.5846977	492.2100289	346.9018978	701.9347203	1088.349154	407.7552121	213.9836525	279.7373115	357.2489514	345.9150398	283.5556805	774.1664569	576.2874949	964.9625758	443.2863192	289.0315466	460.0636221	444.4027358	339.8406683	298.3371008	505.0069596	278.7769991	490.9315455	347.5390387	91.14753714	432.3351772	356.0842734	392.1225824	461.5197822	286.8599619	840.4289011	447.1215702	230.1545633	357.7670365	323.6998699	299.4380559	409.3992811	459.3827259	232.8555074	346.7584986	194.0486563	878.9186067	276.1955337	464.3601202	249.1196607	376.0178481
Temozolomide_1375	288.4794663	431.9929624	457.8526799	200.5125698	582.010024	800.1121725	777.9904078	978.3465633	381.5698864	479.5131512	169.4581985	387.7736617	263.1656537	275.6113025	454.0082268	763.3430616	928.2138612	434.8793496	178.5480722	389.2618651	1075.164317	476.186292	370.9167359	511.5722962	339.8506948	565.9839807	264.0512792	109.33002	603.6495834	271.504357	420.8426645	471.9082098	353.8237894	1021.728791	457.294878	258.2825675	458.7325504	481.3514385	244.768759	465.7684294	392.1505396	263.7524325	310.9924703	150.2246435	899.427168	766.2799188	656.3682116	364.8287524	307.5067188
Carmustine_1807	318.2263796	468.6419061	523.4773877	393.4653288	594.198675	390.1587036	608.0439629	1346.200691	257.3502086	233.622933	316.5842682	419.7382147	430.7042379	383.0648022	815.5598086	388.8517097	1004.339923	604.5746261	273.5579987	483.2687533	371.197406	382.7151914	332.2522975	503.0019874	379.6322902	541.8380714	359.3765048	156.6330802	511.3480702	403.5967352	362.2675432	406.5160745	304.6459821	1039.720926	531.58999	306.7259571	415.6544341	381.4986462	491.7911237	369.790872	487.1262481	247.0633195	361.5036703	258.6617061	1021.860773	287.4176648	515.3624228	259.5006136	378.9668911
[truncated: 252 more columns]
