# Supplementary material for: New Biomarkers Based on Dendritic Cells for Breast Cancer Treatment and Prognosis Diagnosis
Source: Int J Mol Sci. 2023 Feb 17;24(4):4058. doi: 10.3390/ijms24044058 (PMC9963148; doi:10.3390/ijms24044058)
Supplement: Supplementary file 1 [file ijms-24-04058-s001.zip › Supplementary Tables S2.csv]

IC50 value ranking of cDChigh group
X	AVERAGE	TCGA.A1.A0SP.01	TCGA.A8.A06X.01	TCGA.AC.A8OS.01	TCGA.A8.A09K.01	TCGA.OL.A5RY.01	TCGA.BH.A0DG.01	TCGA.B6.A0I9.01	TCGA.D8.A1X9.01	TCGA.A2.A1FZ.01	TCGA.AR.A251.01	TCGA.EW.A1PF.01	TCGA.AR.A24S.01	TCGA.E2.A1IJ.01	TCGA.AR.A24O.01	TCGA.XX.A899.01	TCGA.D8.A1XK.01	TCGA.AC.A5XS.01	TCGA.E9.A5FL.01	TCGA.E9.A24A.01	TCGA.A8.A07C.01	TCGA.AR.A24Q.01	TCGA.AR.A2LE.01	TCGA.AR.A0U4.01	TCGA.GM.A2DN.01	TCGA.D8.A1JG.01	TCGA.A2.A04Q.01	TCGA.A7.A6VV.01	TCGA.E9.A1NC.01	TCGA.OL.A5S0.01	TCGA.AQ.A54O.01	TCGA.OL.A5RV.01	TCGA.A2.A25E.01	TCGA.A2.A0SW.01	TCGA.E2.A1B6.01	TCGA.D8.A1XW.01	TCGA.EW.A6SD.01	TCGA.E2.A14Z.01	TCGA.AR.A5QP.01	TCGA.BH.A42V.01	TCGA.B6.A0RS.01	TCGA.D8.A1JL.01	TCGA.BH.A0DZ.01	TCGA.C8.A135.01	TCGA.5L.AAT1.01	TCGA.AR.A24R.01	TCGA.S3.AA0Z.01	TCGA.D8.A1J8.01	TCGA.A2.A0ER.01
Bortezomib_1191	0.008574653	0.003976665	0.008386434	0.009089384	0.009504875	0.006091552	0.012935416	0.013139616	0.013922414	0.009412556	0.003582328	0.010007197	0.005838457	0.010316829	0.010441687	0.007643527	0.004757017	0.006364926	0.011677645	0.013767141	0.003817343	0.004731703	0.015331295	0.004400198	0.007180793	0.00658949	0.003916584	0.005688046	0.005601846	0.003912402	0.010421613	0.012023145	0.011244628	0.007642618	0.002772614	0.004340412	0.007159497	0.005871747	0.008079717	0.008375664	0.006451053	0.005046487	0.008581667	0.011188379	0.007359072	0.010860553	0.003299332	0.009981476	0.013602497
Dactinomycin_1911	0.010191465	0.004413593	0.013470355	0.004851787	0.022656432	0.002727885	0.010109465	0.018867516	0.018580882	0.012816236	0.010675011	0.012025449	0.006750417	0.007312758	0.008249985	0.004075939	0.005498396	0.005471132	0.006653422	0.007679263	0.005424938	0.008599815	0.011703897	0.005533417	0.006559754	0.007214268	0.002514501	0.003670679	0.00619762	0.004793659	0.015070179	0.007718715	0.018851029	0.011324031	0.002208248	0.014037608	0.009581101	0.005506598	0.00662356	0.004072303	0.008917745	0.007161779	0.008451157	0.008094849	0.003516438	0.02811067	0.002373044	0.014238532	0.02758228
Docetaxel_1007	0.014139707	0.003466151	0.009680748	0.009163705	0.024191224	0.003193533	0.01670838	0.017871175	0.021316697	0.013470817	0.00615906	0.015842842	0.006401615	0.011537272	0.015360894	0.009632791	0.00364734	0.008957613	0.006927439	0.014387594	0.003803722	0.011012721	0.015589499	0.004494536	0.007582267	0.007223159	0.005511621	0.004617674	0.011889458	0.004539842	0.033752482	0.011146098	0.023530435	0.009589707	0.004556092	0.020667581	0.008128343	0.005581353	0.009193377	0.005771889	0.005515388	0.00717363	0.005698945	0.017780459	0.005882488	0.05357278	0.002293529	0.015078931	0.025091139
Daporinad_1248	0.015159408	0.010136135	0.011031907	0.017485589	0.007110441	0.00861177	0.015795171	0.00851838	0.021209867	0.008175666	0.006214946	0.037673927	0.007879136	0.008995374	0.00695903	0.008139247	0.003406955	0.012260227	0.009287558	0.004273229	0.002126377	0.011197724	0.007373165	0.014232952	0.00747049	0.086307815	0.015568943	0.006906466	0.01113814	0.010192003	0.021411637	0.012378865	0.007970123	0.054974304	0.003584875	0.006077156	0.02454661	0.006303156	0.009089841	0.00515364	0.010008828	0.008467196	0.008652874	0.052183987	0.007885781	0.015927703	0.001672913	0.043900372	0.011158302
Sepantronium bromide_1941	0.015544051	0.009397102	0.010674537	0.016730718	0.013928003	0.025050549	0.02183884	0.010783157	0.009792188	0.013319986	0.008118499	0.015006877	0.011257251	0.021151572	0.023640016	0.02460269	0.00391427	0.010064483	0.062221192	0.015403628	0.007757839	0.011855666	0.017251557	0.016832845	0.017050862	0.017673183	0.011836043	0.014184896	0.012011378	0.008406631	0.012626045	0.012322135	0.014447232	0.01128006	0.009315621	0.012069909	0.019085796	0.009949127	0.009124418	0.016561732	0.016747413	0.015419275	0.019984478	0.02040522	0.010791514	0.006443195	0.022867752	0.006444191	0.01776689
Vinblastine_1004	0.03525597	0.004376728	0.018971028	0.019136878	0.018666473	0.00601325	0.022748329	0.050099921	0.054903999	0.025174978	0.011826711	0.040682596	0.014110666	0.023797409	0.031065171	0.013474388	0.007652545	0.028987868	0.038173617	0.017617745	0.004016389	0.01928737	0.030581879	0.006167704	0.014965903	0.02060405	0.009937127	0.007884684	0.049165373	0.018582899	0.088626473	0.016059636	0.041374571	0.031884559	0.004518618	0.067746225	0.024608845	0.012275681	0.027552201	0.01047042	0.025557687	0.014082791	0.01332013	0.071777375	0.00776407	0.114466537	0.002312785	0.050197224	0.066642043
Eg5_9814_1712	0.061387534	0.03122152	0.030547947	0.033930049	0.024809596	0.014116595	0.049448594	0.047695961	0.145290989	0.032040139	0.052399237	0.084301911	0.063106875	0.056938962	0.062874808	0.029420613	0.012597541	0.049846262	0.050525871	0.064396654	0.007943675	0.038622082	0.049924579	0.035165405	0.02649021	0.06820958	0.024584403	0.022352208	0.041712991	0.040831635	0.139875997	0.022082238	0.133601375	0.085276288	0.015102956	0.080689858	0.0344599	0.032736944	0.035441554	0.023886476	0.018342607	0.02494663	0.035276743	0.098533466	0.018496575	0.620028104	0.007994464	0.132519346	0.09766769
Staurosporine_1034	0.067245708	0.020569184	0.097992019	0.032049623	0.407001006	0.011134933	0.037785779	0.121425044	0.086974656	0.047400239	0.027260726	0.05936456	0.021009389	0.025744295	0.033319738	0.025639747	0.049635169	0.059709815	0.037440985	0.036759517	0.025602748	0.026110456	0.076668029	0.026071121	0.031642487	0.041471585	0.019105477	0.009523871	0.024261274	0.022883749	0.227090812	0.058532186	0.193863583	0.062525796	0.020776568	0.067401254	0.034987603	0.038425211	0.05211167	0.030932962	0.034301231	0.03016206	0.023186736	0.048175812	0.024810257	0.395475304	0.018366374	0.095191331	0.209018283
Dinaciclib_1180	0.075841476	0.054523835	0.042057842	0.054005631	0.096487991	0.02815979	0.09694718	0.123363772	0.162700714	0.055391696	0.046056942	0.1026673	0.038093552	0.056967068	0.047754705	0.047387804	0.041147895	0.059553533	0.051950691	0.056195775	0.029445927	0.073835303	0.067752797	0.025981152	0.046310278	0.050043329	0.029549879	0.033372055	0.038171984	0.034747319	0.243463697	0.059077573	0.103552291	0.089279275	0.027000334	0.043917312	0.051009052	0.036310709	0.056873144	0.049446465	0.042950282	0.023860081	0.061283271	0.123637129	0.04607733	0.161820969	0.021844833	0.084515739	0.145824214
Vinorelbine_2048	0.076035522	0.010651308	0.055469105	0.031761017	0.106380752	0.007930792	0.056973966	0.115271219	0.172017254	0.055998318	0.072594608	0.0640404	0.02992452	0.049549391	0.072802174	0.022859309	0.014050112	0.035446042	0.02119609	0.057758325	0.010771737	0.056517459	0.063572345	0.017275429	0.024674071	0.03002442	0.009977046	0.017761334	0.057955164	0.020271294	0.110456412	0.037750371	0.165174567	0.054002402	0.006775475	0.223755944	0.031721651	0.017658876	0.036867172	0.018000228	0.020945146	0.035534243	0.01961332	0.096049943	0.013621102	0.454795483	0.005157558	0.12586832	0.328606578
Dactinomycin_1811	0.094288386	0.08244618	0.091964147	0.048335748	0.152291539	0.038370737	0.109328638	0.095535931	0.157408884	0.081353992	0.157451906	0.109638612	0.055549621	0.087173465	0.077072636	0.045239538	0.041488598	0.092884648	0.073423944	0.076048695	0.064702761	0.180613577	0.066135804	0.072313293	0.051844194	0.108459778	0.047031904	0.069906868	0.132421325	0.087095869	0.166236654	0.057419768	0.188199959	0.129914814	0.032400811	0.192478226	0.08145369	0.048131428	0.058475369	0.040964805	0.074315648	0.09089081	0.075652575	0.172044243	0.033679826	0.14714808	0.026212235	0.108622943	0.13438776
Paclitaxel_1080	0.100995742	0.01636546	0.058986235	0.053425673	0.149385971	0.01599647	0.130914654	0.108411831	0.193615135	0.07957807	0.022982074	0.132655347	0.02463625	0.091787993	0.105688125	0.04084959	0.01306519	0.041887888	0.040725699	0.082342077	0.011886721	0.098559052	0.097640379	0.019336589	0.036897471	0.026369387	0.025663751	0.027252539	0.107082971	0.016420266	0.216092665	0.04762233	0.148633176	0.069299519	0.014856178	0.116229673	0.025609972	0.023635951	0.043483519	0.029380975	0.019229344	0.039392897	0.0552875	0.123442243	0.022187579	0.364883816	0.005810387	0.117402151	0.247114455
CDK9_5038_1709	0.121953262	0.108568339	0.085302305	0.068522894	0.116381409	0.032969795	0.133597065	0.196077177	0.37580116	0.065422153	0.084859777	0.180483642	0.040249346	0.095906573	0.077697791	0.052152561	0.066307953	0.096756318	0.094510515	0.08551195	0.081374413	0.114893828	0.117300271	0.031007893	0.07123938	0.091571552	0.039412151	0.031951981	0.041747038	0.054803825	0.254984745	0.079012005	0.190565082	0.177132818	0.031197657	0.079470137	0.066408478	0.077366507	0.094838701	0.05713584	0.048468001	0.044345044	0.119410204	0.169975442	0.058515679	0.231170184	0.022349869	0.276561752	0.275776036
Camptothecin_1003	0.125995731	0.025662996	0.099215347	0.053947422	0.268609132	0.022020357	0.176091866	0.228598727	0.250528674	0.192684417	0.42288766	0.197137875	0.085068019	0.076855863	0.093241788	0.040233882	0.037761691	0.069283981	0.054248615	0.112310684	0.104860151	0.234212292	0.074980603	0.030535372	0.04658859	0.05453245	0.038230408	0.111459982	0.06444915	0.066213917	0.118016137	0.095738878	0.376479302	0.111715293	0.019486598	0.801141412	0.117679808	0.07031965	0.073889944	0.065384747	0.164083322	0.107558574	0.111635799	0.350957534	0.022866218	0.172843406	0.036127508	0.116188983	0.354109308
Luminespib_1559	0.133322763	0.058814328	0.097372618	0.067671201	0.210999132	0.03043078	0.117503369	0.111005079	0.278806132	0.140573485	0.093680193	0.118569828	0.070835048	0.063256049	0.117226096	0.057334927	0.069372661	0.092250608	0.196448767	0.091560146	0.039786828	0.110140043	0.26415868	0.050275704	0.047694919	0.073926993	0.061289884	0.087064591	0.079296419	0.052054395	0.243486538	0.055330245	0.317320501	0.118752775	0.028514383	0.300459505	0.047802215	0.0518362	0.076467018	0.050933115	0.095729869	0.100266761	0.035094948	0.146345591	0.044982473	0.29149072	0.038195521	0.1361882	0.29749872
Rapamycin_1084	0.134723231	0.169792786	0.127650461	0.067014849	0.292817137	0.031918211	0.145085959	0.203437216	0.221280843	0.146794351	0.136668892	0.146860816	0.087929223	0.118767129	0.179612187	0.092237113	0.233104367	0.049404267	0.08242713	0.174130326	0.123524414	0.213812782	0.230021568	0.116621628	0.089485387	0.060162855	0.046048627	0.164853633	0.152679258	0.049892759	0.103271381	0.128252153	0.175705445	0.048438689	0.035164402	0.301147361	0.051847549	0.052250972	0.07128644	0.072254879	0.044719829	0.178634519	0.163731907	0.10766468	0.058701506	0.299378947	0.090611945	0.152502087	0.430749412
MG-132_1862	0.206888627	0.115526841	0.217460783	0.250488937	0.250721588	0.175473112	0.274383588	0.295887438	0.289971114	0.222325697	0.106201283	0.260935856	0.146324019	0.199531564	0.238511403	0.189309258	0.139534288	0.181210362	0.194310008	0.264511271	0.124853506	0.132667339	0.273981014	0.167996908	0.173555032	0.195646624	0.135487369	0.169171801	0.161020604	0.141281892	0.232551038	0.275129113	0.32938523	0.208461851	0.103668753	0.157488634	0.202671856	0.156632611	0.200166627	0.206871235	0.203963208	0.173400824	0.203743439	0.284205809	0.18147162	0.310182651	0.129996309	0.210238661	0.350784311
Dactolisib_1057	0.243727441	0.185114589	0.485028713	0.088618377	1.417662632	0.067231781	0.209466578	0.23874554	0.756412853	0.217005756	0.412141103	0.201560703	0.184476772	0.156603605	0.226945741	0.09771226	0.431026705	0.110454426	0.170664129	0.235758138	0.285889774	0.304019469	0.422713196	0.29240502	0.153204531	0.127090893	0.100153273	0.241495871	0.324239885	0.133916886	0.205583706	0.166968587	0.611622645	0.093509448	0.115452341	0.388999818	0.1640911	0.083607888	0.10722153	0.09334402	0.149066814	0.697685134	0.151490928	0.170117911	0.075513504	0.764865641	0.105424808	0.170549056	0.555297243
Vincristine_1818	0.272884668	0.066424875	0.089316132	0.139725274	0.092419234	0.049756754	0.220233263	0.456356566	0.40497673	0.160450725	0.079152289	0.257542867	0.067852185	0.234182229	0.155166577	0.065261137	0.035696901	0.286159752	0.476446266	0.175108603	0.02695918	0.182981286	0.175699876	0.046664008	0.084953425	0.147399225	0.046754834	0.086167282	0.345010671	0.13646925	1.171899009	0.122578307	0.422575329	0.357816886	0.021182066	0.433693649	0.133910504	0.062795737	0.177389605	0.073041911	0.107596051	0.067225888	0.121349472	0.709197927	0.054612523	1.053105722	0.012554157	0.685411583	0.589308365
Docetaxel_1819	0.277774487	0.014194107	0.087173104	0.053975593	0.195246718	0.007957059	0.132204538	0.23153801	0.289564133	0.102452552	0.075103506	0.182900822	0.050330552	0.133146048	0.099283866	0.036115576	0.011757231	0.213669199	0.044364739	0.223643643	0.008722337	0.06760389	0.084851618	0.02954219	0.049525575	0.075247905	0.024714927	0.032914171	0.088454067	0.055618688	1.186265198	0.100669865	0.456155185	0.130157155	0.014891732	0.967039981	0.063076867	0.030863673	0.091071495	0.026892988	0.036103769	0.03457151	0.038536359	0.14375304	0.028999735	3.753384621	0.005688629	0.881549727	0.462714053
Epirubicin_1511	0.436737236	0.224904578	0.747800285	0.244433207	0.828052421	0.133364084	0.418056445	0.824341476	0.660100258	0.537226686	0.586613665	0.42339356	0.330530598	0.263070008	0.380077074	0.190147001	0.228220699	0.297826532	0.682217817	0.290136281	0.270957722	0.367410166	0.527823909	0.286896429	0.280223398	0.278746559	0.129682984	0.281807565	0.3318402	0.221355481	0.624605622	0.377995586	0.763728239	0.493392364	0.128780517	0.698051022	0.386237568	0.259904705	0.312176371	0.234594066	0.425868608	0.393341247	0.363119693	0.511259933	0.116235157	0.796113226	0.074712012	0.550491799	1.531187786
Podophyllotoxin bromide_1825	0.604004026	0.29938908	0.355749105	0.426160949	0.40840055	0.223736441	0.487349097	1.073817863	0.928365081	0.464010641	0.374888303	0.565946664	0.321756815	0.547385079	0.512385454	0.326731048	0.277061333	0.724061885	0.660172337	0.630657879	0.230497083	0.619324536	0.580924868	0.237564685	0.370938286	0.567644361	0.234877254	0.39445286	0.724920511	0.396906596	1.735226091	0.505956156	0.933320676	0.608333492	0.19893616	1.033938218	0.353493281	0.294846653	0.556865722	0.346126992	0.356022048	0.333464348	0.354575264	0.742376842	0.27964663	1.759164027	0.184022759	1.163072042	1.485636086
Sabutoclax_1849	0.715905091	0.548855744	0.644898518	0.562178112	0.46333243	0.474738904	0.886336141	1.328024732	1.087330582	0.753992915	0.868654913	0.869757396	0.62279941	0.626203197	0.673832344	0.43297997	0.350091292	0.51582889	1.313060555	0.83431339	0.50531056	0.624188345	0.765735821	0.758132222	0.442576311	0.794947173	0.402203697	0.71800635	0.748280792	0.687551568	0.64285028	0.660075586	0.926053384	0.925199284	0.267155911	1.600568212	0.630915553	0.572496303	0.429636887	0.438572156	0.652198743	0.839452765	0.681858063	0.875916467	0.441583394	0.892968487	0.338085971	0.938172324	0.991362197
CDK9_5576_1708	0.811565208	0.648937994	0.603106295	0.579232755	0.91728976	0.285415582	0.892296915	1.344617101	2.248352784	0.552271011	0.822852402	1.056945949	0.388485891	0.671694832	0.522943931	0.407833369	0.445293952	0.696641722	0.574557743	0.676121386	0.637159494	0.902262577	0.74280585	0.267393607	0.413599489	0.75422472	0.341448212	0.363896915	0.405501413	0.431118808	1.971370033	0.587595823	1.150131921	1.223592583	0.287149766	0.660117849	0.434825617	0.526528896	0.741971888	0.46395332	0.447958088	0.315881154	0.803009054	1.405665973	0.442334881	1.194126042	0.265073052	1.520345312	1.548719542
AZD8055_1059	0.827883512	0.859201597	0.913868631	0.751861946	0.922776247	0.651119161	0.847423819	0.977351925	0.894101473	0.851338297	0.835005152	0.837219063	0.868035933	0.770967095	0.843730391	0.732110988	0.997919918	0.681731435	1.075374599	0.821886139	0.929876628	0.804344327	0.941367517	0.869571426	0.771817004	0.725431472	0.742172216	0.913474686	0.820117489	0.77426417	0.855958396	0.93791315	0.964285477	0.656510191	0.710216741	0.759048883	0.822455372	0.740773342	0.817157236	0.759071408	0.764658724	0.991527138	0.791250408	0.783474569	0.654676356	1.069686677	0.901842499	0.748561031	0.970789258
Gemcitabine_1190	1.231458181	0.143187681	0.387664463	0.812517365	2.885668908	0.041317505	1.210669321	2.783768389	1.335277975	1.752203497	1.172230467	1.50615677	0.263434519	0.352319106	0.579170871	0.140239224	0.09920703	0.38696613	0.187312966	0.423147718	0.270329204	0.984862651	0.353229699	0.053956703	0.21123946	0.355616256	0.108675937	0.405166917	0.161537471	0.123738236	0.433236355	0.826380972	2.449477316	1.045988138	0.034078343	4.433256141	0.455552303	0.241320618	0.472505016	0.270887138	0.721262751	1.096952907	0.49791039	2.479182498	0.088715017	3.460133935	0.121902117	1.789441418	12.77893502
Topotecan_1808	1.495816319	0.585953789	1.904741696	0.600405046	2.022068581	0.238870221	1.920311101	3.430854355	3.435035894	2.281714683	2.952409928	3.241781341	1.050474999	1.202909416	0.984031579	0.356514464	0.263614598	0.820957514	0.317227811	1.650784675	1.201111972	2.162496434	1.198239679	0.654929149	0.604151638	0.917620253	0.422958141	0.831198853	0.442281196	0.901679412	1.284690752	1.135310277	3.026408934	2.225813507	0.183902102	4.797761103	1.613295466	0.817298311	0.789398544	0.628533681	1.931653939	0.904371489	1.481890172	3.831021332	0.258912092	1.931138897	0.546507708	2.276222305	2.929749818
BI-2536_1086	1.545668799	0.254698309	1.255842295	1.562247258	2.234759715	2.070718611	1.809459285	1.980897843	1.14826982	1.467409166	0.077502223	1.896185782	0.799029135	1.343138694	0.560811916	1.41949024	0.306132422	2.74105861	1.564347975	0.809401504	0.061862849	0.159990002	0.803429376	0.972541209	1.746114663	0.841529672	2.08040834	0.72895448	1.368037593	1.477346011	3.381140659	2.236497174	0.871944894	1.9843356	1.222182182	0.622169959	2.547378889	1.954351061	1.76085759	1.718595286	1.276207748	0.728879446	0.937258115	1.150638737	2.70056471	1.916026878	0.752471077	0.554795574	1.289555024
AZD7762_1022	1.560109227	0.229892877	1.363432023	1.176363371	2.464736176	0.262969077	2.149235297	3.834256462	3.527491705	2.653695076	0.396060911	1.810048823	0.63007989	1.359812069	1.658572292	0.664644118	0.372664168	1.272731977	0.337810312	2.010347873	0.288268921	0.517994308	3.117016675	0.223384798	0.970615351	0.900965554	0.255703835	0.285706108	0.545998028	0.212822428	2.357971482	2.284356098	4.140991761	1.396066757	0.10187117	0.996649358	0.679762986	0.718285058	1.476924497	0.856852171	1.14112636	0.563654903	1.150087864	1.668163406	0.71018842	3.119776367	0.111725714	2.674584258	6.457759331
Telomerase Inhibitor IX_1930	1.760334164	0.593495707	2.178839726	1.557748295	1.681655036	1.284662165	2.157815074	2.165006092	2.202033251	1.545093043	1.765191769	1.97083206	1.523270194	1.371854169	1.773593075	1.245681706	1.066832123	1.374130624	2.934816567	1.518914613	0.818669003	1.620065951	2.195206557	1.010810047	1.210392796	2.55187656	0.995638444	1.808876104	1.694783135	0.840541472	1.740530344	1.273880602	1.799058334	2.189433267	0.669264614	1.955504336	2.429875531	1.073954665	1.235555029	1.150307635	1.589263047	1.342826097	1.81830426	4.071352254	1.108098815	2.232876877	0.558473355	1.8808421	2.605028244
GNE-317_1926	1.811788089	2.006265371	2.702066921	1.137817274	4.177091866	0.803104932	1.715527077	1.959528818	3.961756154	1.756277813	2.684893118	1.665801319	1.518716886	1.394262681	1.722021951	1.189621473	4.008664762	1.115119689	1.502184863	1.983928667	2.112837026	2.056156325	2.275468307	2.231792107	1.330475804	1.422447529	1.051575267	2.099460837	1.899805657	1.229612331	1.973786377	1.646673952	2.420335636	1.120000267	1.189552646	2.590104488	1.210570001	1.113229708	1.169221162	1.194838101	1.063960787	4.51313657	1.364957126	1.606554189	1.007927669	3.852786822	1.134609791	1.765448838	3.751448341
BMS-754807_2171	2.023786382	1.966037192	3.285754622	1.353008634	2.340489635	1.049878829	1.699909509	4.292565254	2.570044525	1.90090534	2.241970807	1.898272169	1.994657636	1.345702791	1.440923129	1.175062574	4.025946188	1.85703721	1.899891783	1.923730473	2.382760679	1.449266	2.640418789	2.091939957	1.612715481	1.834464332	1.537337577	2.368021461	2.168294726	2.325944335	2.459053759	1.942418197	3.05989834	1.844438924	1.079966529	1.522770911	2.489218047	1.961037554	1.902191162	1.363542717	2.773030873	1.934302743	2.394124829	2.335242339	1.340505655	3.097453203	2.961670608	2.265297716	3.568997417
PD0325901_1060	2.082148315	0.403964564	2.292858462	0.890601445	5.076660625	0.474594112	1.923808565	1.524190417	3.165142362	1.576909887	5.843830006	2.009837935	1.499450812	1.30729024	1.442548271	0.872635473	1.957281232	1.857763682	0.511294402	1.156720168	0.717559546	1.322671864	0.762618019	0.535165732	0.870837999	2.266697684	0.895921015	1.379848319	0.972387122	1.124998325	2.777759916	1.336481172	5.599950661	2.348295549	0.559702997	2.061600431	1.939728564	1.83475751	1.996217927	0.866381373	1.792439795	2.389695426	2.320708177	3.370534232	0.871954653	4.805869807	0.879654706	2.44417741	5.674104395
MK-1775_1179	2.29996383	0.279844533	2.292536246	1.769888095	2.647442909	0.679297262	3.373467916	2.843358545	2.93390256	2.903776005	0.65334267	1.894161162	1.090233535	3.077457878	2.111227006	0.957405322	0.544526659	2.442996923	1.072862938	3.451319906	0.341827632	1.395352413	2.839601288	0.82162324	1.401892409	1.414040129	0.613476158	1.053040978	2.308756324	0.726567737	5.266214297	2.383266415	3.081696388	2.481981107	0.549934109	3.153957689	1.424919211	1.329456468	2.118344041	1.285830487	2.13293307	1.239009007	1.573858271	3.969191699	1.319425177	5.200523852	0.192606645	1.734588879	4.835975734
Teniposide_1809	2.415535096	0.605886286	2.987552205	1.551978301	5.927701339	0.348724333	3.647616568	5.171886324	4.720554014	3.320171511	3.697278363	4.80300555	1.269980134	1.514029061	1.505592421	0.585347584	0.267524987	2.039229031	1.565313824	2.362760667	0.753045455	1.78347106	2.170329198	0.639682608	0.666875599	2.350166675	0.323201078	1.425565695	0.98949743	0.707370359	3.915188312	2.375357502	6.335292828	4.106518688	0.22290457	6.808784077	1.89271369	1.005113848	1.427579542	0.790242754	2.102466341	0.716585399	2.568905904	5.317292575	0.36437116	5.001242971	0.185622279	3.797082797	6.506548979
Mitoxantrone_1810	2.502754132	2.338697457	4.052071707	0.900423269	4.484623673	0.507747843	2.880821727	5.674073071	5.506959969	2.56502132	5.199812737	4.884485005	1.174484728	1.405733532	1.011520799	0.52195103	0.585044032	2.522145198	1.05747976	1.548809141	1.161372512	2.13242453	1.273885611	1.418666163	0.733115671	2.364803185	0.513735012	1.822535449	2.041900949	2.786438411	5.537964656	2.287372265	7.736859173	5.578878224	0.278696575	6.881306379	2.21179284	1.255114915	1.448029526	1.066670357	2.20981045	1.366121741	1.68093805	7.239538345	0.460407163	6.622757603	0.313144734	2.114333621	7.47741566
Dihydrorotenone_1827	2.607271341	1.556613213	2.117533326	3.306865765	1.193130596	2.516130117	3.242085207	1.537454047	3.782533313	2.815677324	2.271788372	3.455797967	3.267658411	3.594589446	3.949794147	2.729801778	1.282559126	2.146656291	2.632579349	3.487543654	1.88206341	3.39265151	3.750294426	2.846714415	2.042736601	2.012081265	2.265246672	2.591636169	3.419799415	1.964103064	2.410409575	1.864725541	1.865969149	2.172404256	1.750956063	3.585531866	1.083824237	2.04062706	2.159740383	1.630742408	2.113134274	2.415119726	3.585018368	2.578473207	1.967599422	2.439391821	1.481212667	3.842539879	2.580056479
Trametinib_1372	2.628292836	0.392440271	3.76393972	0.981717726	13.13482779	0.275818732	1.666206105	1.754353791	2.925453183	1.249844515	10.33170493	1.390032	2.768692062	0.728189521	1.117910191	0.908012798	3.308596957	1.741624992	0.098513203	1.059177241	1.528040626	1.0919534	0.642663069	1.233225321	0.924948961	9.809680453	0.950696928	0.964918072	0.413866489	0.842689854	1.728423861	1.472813558	6.625219092	4.058884355	0.757212979	2.203676156	1.797830502	3.431808203	1.778813077	0.603226707	1.065739661	3.972314247	1.467398066	3.417362507	0.736970463	8.639636808	1.739488638	4.692353804	6.702558481
Buparlisib_1873	2.774340487	1.554169557	3.445737031	1.914338732	5.484332386	1.382534189	2.996594985	4.192514889	4.349332283	2.469454012	2.459299028	2.78774352	2.095250508	2.310486233	2.517550053	2.001148137	2.939910161	2.188365317	2.718223246	3.114582682	1.501726378	2.43512775	2.967570608	1.999563041	2.19361267	2.184237866	1.682125588	2.157065845	3.82252494	2.098895634	6.087670373	2.540851079	4.318705958	2.838300277	2.036469246	3.315330686	1.945755282	2.178625806	2.389132505	1.804581277	2.114895623	3.072276191	1.936948292	2.748167705	1.820309227	5.490669539	0.971755249	3.511423101	6.259254729
Pevonedistat_1529	3.050619656	0.263660313	3.666801741	2.274517963	2.199354185	0.381313738	4.168944846	3.67373617	7.24204602	4.947923734	1.781228432	4.863792695	2.15904068	2.402401358	3.297880853	1.063359104	0.304978645	1.148707346	2.260933995	2.395932216	1.596317641	1.041346761	6.097081622	0.689923422	1.386193613	2.692066515	0.578432843	1.204019735	0.605842115	0.967681078	1.642195409	2.487613835	3.584433047	3.271103563	0.204339126	1.914057635	4.665446535	0.910963018	1.091068099	1.060920196	3.410449631	1.057625741	2.977075902	6.748340203	0.707138157	4.566926002	0.518951953	4.309423447	8.614910221
Foretinib_2040	3.134039366	1.196852722	3.695883486	1.488504297	8.29966749	0.873341974	2.282016876	6.871331446	4.705207602	3.595787154	2.042630454	3.176781704	1.815150696	1.646108157	2.081797305	1.162392499	3.05498135	3.063249154	1.378744289	3.617011765	1.309897439	1.519074998	2.908065541	2.241772703	2.472094213	2.655924375	1.506064603	1.455365801	2.167808956	1.367008564	8.095934738	2.882854688	7.419500215	4.068671781	1.094969915	3.705707713	1.830053936	2.236409923	2.581591571	1.131588823	2.457486526	1.453932934	2.093237314	3.043342501	1.666918584	14.28368023	1.212545825	5.460879117	6.976205482
Obatoclax Mesylate_1068	4.255874672	1.712921796	3.966032401	3.96194265	4.993865858	2.91614569	4.27963508	7.010451916	5.611513678	4.722388284	4.592121819	4.02912024	3.008852779	3.921867946	4.078622087	2.601157859	3.176751977	4.245357997	4.083092796	4.663068061	2.609676114	3.413670063	4.751935338	3.216808982	3.139259744	5.292119766	2.958674861	3.882733897	3.147055545	2.736876558	5.815056787	5.108478545	5.819971413	4.574152464	1.431543446	6.987758052	5.122898534	3.356225169	4.047872393	2.759524991	4.936033829	3.109868073	3.566506987	7.242549979	2.806358595	6.447413058	2.991711202	6.294182618	5.482674536
Vorinostat_1012	4.449335736	2.479931448	3.361202543	3.948997572	2.264443305	4.531042306	6.584829604	4.054571552	6.831145388	4.915203639	2.850844571	5.395734179	4.075269244	4.671302847	5.168288642	3.205142707	6.331528231	3.596454164	6.654524671	5.051696163	1.754645181	4.216500004	5.098883855	2.897979905	3.790248947	3.80646933	3.33812931	4.649109452	5.691983973	3.083286646	4.517995624	3.221681161	4.287071377	4.324605914	2.147780965	4.207562755	2.804900575	3.317310974	4.360177566	2.996423381	3.185920708	5.305165668	4.076587089	5.815847162	3.610632592	4.820811637	2.53495648	8.084769098	5.791643953
Pictilisib_1058	4.893681673	4.31485763	8.451552238	1.841441054	22.40015103	1.383463458	4.231718032	4.035542047	12.95887523	4.021510932	4.274640244	4.597838149	3.012047941	3.251348242	4.931201723	2.955105614	15.63835871	2.347840928	3.488537101	5.396667135	2.942027543	4.349739517	6.876732801	5.237069227	3.237851521	1.690713414	2.225029524	2.58474909	5.710424623	2.254310602	9.130961944	2.487074559	12.7385656	3.547355317	3.825094341	6.950807796	1.246114675	2.440125777	2.525931289	1.985354176	2.146221952	10.32359267	3.190451873	4.38594733	2.004147372	15.38836377	1.017241231	5.654263007	19.05599319
Osimertinib_1919	6.259202884	2.566009391	8.260778834	5.34087905	12.30582432	2.66672304	4.738887916	3.597805583	9.979119345	6.583301921	4.582969873	7.788119169	3.087889579	3.947966266	5.494234238	6.126023983	10.55060453	5.102680108	6.855208483	4.074688395	3.220042422	5.055043252	8.611433681	6.268458427	4.890339774	1.671092197	6.40628776	7.014204196	12.28980994	7.976508401	21.27690674	3.850810428	8.525600201	8.169341849	6.973219461	4.413998833	1.475574149	6.615991614	5.327567082	4.812440395	5.507386372	4.247084373	4.034388161	4.002786327	5.33959548	8.132467055	1.901661379	4.581233772	12.68649857
AZD5153_1706	6.340635268	3.266881034	3.994696153	4.262759699	6.673781163	4.052251985	5.935852513	11.2115919	9.469466838	2.736732231	6.042366521	6.821356883	3.953613782	4.409077743	5.918024961	2.307221152	4.217336023	4.625237454	6.202110849	8.779844998	3.787504592	3.426553685	5.47775003	2.323417618	3.774700372	14.06683335	3.147616739	2.323721812	3.932132767	3.518108782	12.84160312	4.169079927	9.030735568	8.045700889	1.866727187	9.838410841	4.503578771	5.284518979	3.363865561	2.012702019	6.254429647	7.082091352	8.50991197	15.58770364	2.333401531	17.02383192	5.592407753	29.75956347	11.76909036
Afatinib_1032	6.946398519	2.838336663	7.511695102	4.992785576	11.09032776	2.326192027	5.401204587	2.745359106	10.77296084	7.167101351	6.749868063	8.542275942	3.410087899	5.916314311	6.959527458	7.2568993	10.98630976	6.978969149	4.031574377	4.768138235	3.271878301	7.340353785	4.959714248	5.664811811	4.349084026	1.478018093	4.963919182	5.751502437	13.00063125	8.33936394	20.47408462	4.317641869	10.80770016	7.130525197	6.999222741	8.0162745	0.927280373	7.749142836	7.575614819	5.77974423	4.815206752	8.734620904	3.622083827	2.079125315	5.178575449	11.0583557	2.065483167	3.769128404	12.84903428
Dasatinib_1079	7.237293622	3.940209043	10.77477053	4.426064404	63.96022213	0.859387208	4.793103534	7.583389252	8.693540472	6.217684936	2.856427947	6.727964465	0.946287052	1.600941624	3.495857773	2.140059592	10.43293675	5.61621861	0.993712513	4.549069449	5.774245844	5.200312663	13.17234452	2.661405256	4.343449994	4.276278568	1.302771072	1.555074732	2.376499546	2.50537728	15.59816232	8.482501383	21.31151241	6.942809192	1.674032202	7.300159225	2.321708893	1.622320367	5.988195781	2.741294473	1.92033314	3.072704558	1.577036599	4.115611992	3.80054124	30.02891214	3.147700312	9.085769036	24.42364718
Cytarabine_1006	7.598899006	1.250164313	9.835313957	3.01572065	11.73505629	1.012295643	7.674123875	10.46246945	21.97772466	9.196316862	7.095760403	12.5341742	3.656628793	3.734841722	6.415074188	2.084247809	2.658364551	8.003536485	7.305511056	4.154228303	1.61437564	9.914012637	4.869548382	1.37279651	2.563236724	4.007903601	1.368001165	7.919471832	6.579157344	3.546417784	13.3409402	4.542050276	12.89113882	8.489233204	0.631910541	15.43488636	4.734968585	2.440091222	4.936693431	2.324209402	5.09223545	4.321311985	6.838911148	8.416622514	1.482587327	23.99349905	0.535014397	9.204624453	22.42864429
IGF1R_3801_1738	7.640313731	2.304683785	5.40556905	3.467680612	22.12963335	1.987025177	5.130082745	15.44657347	10.19723715	4.136068733	4.267190622	6.092311901	3.448698327	3.068528661	3.384557888	1.775663269	2.159757266	10.14357245	2.771445574	8.172960438	0.685919807	2.126432364	6.832600913	6.211720506	2.857116792	14.39661633	2.658309053	1.793499515	3.155959135	2.095540759	45.61372427	4.036594128	20.32662213	15.55340229	1.970968205	22.75445103	5.383290572	4.108413572	3.829668994	1.978905941	5.54146044	2.827557136	4.359599162	13.85697461	3.429450638	49.40796999	0.492936433	15.1277551	25.5688013
Navitoclax_1011	8.377453586	1.48223466	7.437232658	2.94208182	5.027445628	11.72007864	20.04664345	6.680622118	10.86013768	13.25953338	2.643225784	8.855636291	7.263876366	12.0301517	6.771114582	3.09303595	9.748539462	4.115630871	41.41270218	15.43418429	3.196447963	5.438751772	7.372242535	5.863192269	8.594626566	2.365044659	4.535657693	12.58430849	14.02332312	8.287482304	5.657624302	5.546114292	2.303427	3.642749578	3.05565848	3.346771648	13.48877007	4.887256804	10.23902255	6.08576589	8.923516094	6.08997193	20.38061314	21.26008648	7.145435257	5.330443753	1.60782008	3.740299348	5.931772994
Wee1 Inhibitor_1046	8.892284563	1.762566468	6.446727552	7.66370016	4.502158495	4.536156928	14.40363425	8.790357996	12.63956132	9.104046047	3.130156791	7.555476454	4.593850795	13.80205016	9.608979558	4.028317875	3.285514201	11.76077702	9.32830882	9.933576023	1.526898209	5.458336817	9.155391814	3.159248419	6.189280027	6.087279281	4.517078334	6.876823393	14.97050416	5.084872394	15.80881905	7.231060309	7.014186313	10.44108443	2.388345087	13.60776103	6.39445404	4.112882018	8.361766857	5.866725457	10.64316378	5.441550126	8.469984117	25.04500792	5.062442018	11.17897827	1.430256197	8.518030665	9.294601524
Cediranib_1922	9.17092177	4.755464826	9.666457012	8.871281952	19.46154742	6.614238958	9.22636999	13.61482128	9.704168731	7.383490668	7.612534335	8.387588793	7.445175063	5.416866526	6.604299086	6.421719864	13.83031051	6.96279008	14.1711405	6.227273807	4.098075708	4.898691665	15.93777926	9.052575718	7.56595778	10.00436668	5.662363396	7.082306697	11.36570491	5.165205134	18.53787953	8.071953319	11.04489231	10.00400739	5.656224626	5.52795581	8.614713061	7.275830391	6.266172298	6.410708812	7.237340649	4.276762018	7.374646216	19.04035188	6.682840703	20.02033878	2.912918661	8.032190677	16.23694598
AZD2014_1441	9.193353348	13.51731004	10.50316546	3.317439926	23.60052137	5.24444546	7.532043325	10.38396821	15.58579742	7.359093389	30.23941373	5.147442582	7.929061886	5.144402503	7.73389106	4.631024464	41.13901687	5.044681403	6.314917292	7.468127712	24.6507834	14.64392454	10.41985855	10.9999038	6.510201514	6.043931357	6.362489107	8.936035078	9.774166336	6.220286805	7.482553007	6.635034214	23.45365399	7.391383811	7.54787874	21.79937251	3.642655911	5.019667946	4.953922954	4.882792929	4.362642114	24.60474435	7.433997337	9.563701481	3.87729252	20.54513563	5.032595437	11.27059419	20.49007944
BMS-536924_1091	9.334868201	4.049485528	12.71047579	6.939181827	16.63620485	4.58359346	10.09554842	18.45425106	14.18733684	8.676561566	10.52101664	12.47300067	8.051528051	6.759035956	7.359573946	5.763067288	15.14871808	7.745412244	5.926597228	6.202331788	3.452612118	6.537240226	9.435523169	5.4942331	6.300162387	12.30180084	5.075906287	4.601781125	8.915917661	5.71669343	25.87468425	6.510134548	18.21412697	14.6167169	5.157633347	8.493514251	9.765661306	5.617910812	8.278080118	4.067607077	12.90432111	6.09671038	9.365320678	18.42908527	5.054051104	19.13353061	3.307169352	17.60974196	22.97922309
AZ960_1250	9.508366616	3.403780037	6.630781956	5.990181309	19.40928918	2.446321061	6.6730255	21.11799343	13.66078686	7.27045822	11.9775276	8.695815364	3.781165573	5.705153785	6.597737646	3.513662007	4.520980746	9.807887199	8.760391674	10.03937788	3.942764569	8.102140143	17.19945539	3.095504626	4.706940761	7.439742069	2.40736094	4.123862271	5.234463149	3.818028676	32.05701927	8.679622904	24.15565057	11.27885792	1.818122086	25.02678745	6.962652507	5.044394809	9.694350075	5.090579225	10.79564212	3.964574711	6.063624038	19.63308852	3.956729556	32.70600823	1.666783383	12.77109597	33.06167358
Venetoclax_1909	9.827412109	1.836676206	14.13255469	6.9595454	17.53730763	2.879703792	10.14367663	13.33372974	20.6156408	12.68798633	6.87778031	18.49873141	5.389219447	9.235148434	6.636745724	7.247660709	4.949120718	8.900161282	7.943535726	11.02809592	1.994852748	5.346754647	11.65303807	3.173780337	8.834610209	4.675270941	3.284933725	5.081150825	6.301420694	5.482735494	19.45214304	17.59770057	13.31922103	8.472888966	1.305263918	3.295002826	14.05651899	10.51441314	15.01250626	9.310206067	7.009233346	3.673116776	7.753230099	12.33207499	8.338794645	25.01755176	3.58470456	9.162501903	18.35738343
Entinostat_1593	9.90386542	6.196369229	7.47075333	7.115556661	7.732137039	9.757602471	10.69695044	12.57939485	17.35783969	12.89315951	6.910013568	14.46883901	5.899906014	10.40725595	7.458884412	6.611736195	9.013414861	10.05406782	19.99890226	10.08924624	3.196867172	6.25182971	9.376513596	4.241811279	6.876865548	5.441314886	6.198883409	7.872297007	14.78057918	10.06550625	19.64741644	10.90133108	19.24895055	7.21287972	3.444838028	5.870718207	2.443460192	7.98584106	15.45375149	9.541401066	4.746720044	8.932788349	4.791202834	16.44186346	8.172229562	14.50708267	5.804151184	10.08538953	16.42029537
AZD6738_1917	9.955846503	2.271974883	8.233699298	6.564399457	14.04283016	2.506503773	11.11994661	14.20427877	25.06775181	19.32724771	6.352187971	9.594637397	4.119654216	10.49278742	9.949516167	3.988298699	4.234737486	7.697201879	5.4516032	16.49043253	2.998185092	4.880453365	15.8496865	2.633679733	5.797888783	6.624811838	3.168511631	4.131659576	7.031588069	2.848359145	13.92604794	11.77527811	12.82051364	11.11701165	2.10964368	14.73019552	5.957076973	4.180149552	9.135872229	5.851499322	6.937959543	9.92478384	4.35550708	17.06445118	5.869622667	24.16360951	1.058336428	14.37878761	27.83925008
SB505124_1194	9.97026588	12.44400171	11.08848257	10.39628322	12.11484321	12.37903841	7.921536742	6.872367693	8.246083593	8.823479519	12.16376653	9.024826541	8.821291053	10.01936009	8.690918858	12.34650651	11.93584914	9.527371004	7.226449826	7.445514159	7.413264523	9.169145064	8.01379822	12.28033941	10.46505712	9.381592702	10.61013487	11.10438533	11.11958685	10.54714475	10.17044797	11.12518466	9.402178377	9.10316105	14.30123329	8.654812238	7.956885412	10.17997771	8.712256929	10.05772056	8.769668625	13.36926121	6.790328416	7.79160031	10.69076794	9.586133231	9.164404453	6.386082394	9.348916869
Ulixertinib_2047	9.995994506	5.279678152	8.984700281	7.977903511	8.167176057	6.291195244	11.95121021	9.421747489	8.91860028	7.379578385	9.71011818	11.69592981	6.829632111	11.21450374	11.18213169	8.182325654	8.210304318	8.586474402	10.16315081	8.306178413	4.728155775	10.82936778	6.075754817	3.833599126	7.568124261	19.38606027	7.465017211	9.530587879	5.840534645	5.337130559	8.077107286	5.566956369	7.845369353	14.13660208	4.397608847	9.325067151	10.34650784	7.21395096	7.012102208	4.765393793	10.99613461	10.08133075	15.44716963	15.72869409	5.733361473	15.53440415	6.850324342	22.04092376	19.09288263
Alisertib_1051	10.28515424	0.382104659	8.533601977	2.933799459	27.1063742	1.515025065	11.46458273	34.69135283	12.18699674	8.642795175	5.601058436	7.929141762	3.024282475	4.218348539	3.790030618	2.277066293	2.989196682	16.37359305	3.026008296	8.681192059	0.620412649	3.677103453	5.750381201	3.10380526	3.690401173	6.579309045	1.843662181	2.980887833	9.07723794	5.05746495	69.03747575	7.332788345	21.55824859	13.29063879	0.713467164	27.32473079	17.43851885	7.865663891	6.4186771	2.513405897	10.83292815	3.6119535	6.25154223	19.47189348	3.09369478	47.54129482	0.2957699	5.092858291	22.80774657
ABT737_1910	10.45795278	1.295422459	9.940783612	3.586581678	7.358169247	11.63825555	18.91899986	15.16810819	17.15888793	20.31998318	2.050712038	12.61177955	5.717658331	14.93015475	6.400230808	6.167829889	8.821932762	10.05154881	12.59798971	19.99031305	1.907343553	2.066304579	6.588723168	5.518415324	13.50087039	1.991385506	4.466119687	9.874119285	8.762453171	10.48118551	15.61928599	13.06707436	6.06892536	7.68685053	2.874401242	0.987211684	13.74727652	9.557935986	18.71893037	12.07726981	7.193325954	3.675922941	12.72681815	17.20826975	16.671653	14.36813686	7.642266817	5.74901656	9.072196676
Taselisib_1561	10.84298401	7.030197815	17.77593717	2.91816688	52.97786093	1.994719103	8.385063098	5.112891482	30.94600673	5.960101449	11.51778674	8.716878463	5.497892049	6.123176773	6.979718834	4.877390847	34.95232483	6.746460699	5.224391518	8.33664941	2.899820095	9.881978799	12.66498796	9.718814497	4.179403963	1.614549706	4.202840052	4.689008671	25.50783342	12.31352855	43.88309441	3.907875129	33.6525882	10.00022492	9.456968209	17.9353821	0.884527851	5.932287691	6.934979143	5.114248968	4.062443685	19.14249411	4.917124017	11.04672234	3.220996844	31.70500454	0.587877649	5.681675595	56.47889961
PAK_5339_1730	11.2954989	10.19795071	10.48654881	10.0607268	12.65421031	7.415348001	11.32667043	12.95192566	17.90967115	11.01463579	11.35188267	13.60745198	5.536934813	11.80215046	12.10405945	8.177374341	9.377622962	10.27204883	14.66737693	9.735042825	7.868306765	11.38258023	12.84810778	6.896599677	8.124248183	9.376516292	5.666322684	10.1910363	10.89862806	9.151865433	17.05169045	10.90371836	14.07755624	11.04347812	4.826986276	15.85747989	8.217079848	8.926612187	11.4462867	9.015360342	9.078408055	9.313971256	12.55415751	13.04194614	7.722428584	17.13655031	5.903424116	13.80901576	18.83585029
ULK1_4989_1733	11.34471373	12.12689859	6.610911525	8.784091809	15.88802398	4.57582347	12.11251302	12.16919843	17.65413146	9.092247163	5.61548133	16.03085272	4.168971253	13.9306568	12.32060523	10.78441117	2.732513079	6.713529727	10.32890566	8.300427272	6.298938782	8.4310861	20.25233597	5.912851496	7.306376959	9.970054599	4.726388463	3.550699334	3.999064961	4.520826311	18.57510446	10.96651175	15.28215674	12.46296555	3.29412568	16.11809717	7.087966083	7.850288642	8.388083176	10.8236627	4.407891388	7.088199566	6.584978909	15.27606822	5.271391446	19.09516135	4.448217728	7.900407711	17.12409492
BDP-00009066_1866	11.49858347	5.055983854	14.53744504	11.57690148	15.02875285	5.317291774	13.122169	21.65603055	24.22959836	12.64634255	11.4352942	20.84312381	7.694158574	10.06221165	10.09415877	7.449014708	9.822407358	10.82881588	9.130424264	8.458155598	7.417397964	9.091267975	14.89791788	4.588094021	7.22865404	14.1868671	5.735031962	6.32197498	9.60298413	7.444451285	12.83857151	10.27009967	16.40405241	11.85887088	4.185098785	13.21009754	10.03897622	7.49852211	9.090231727	8.706133448	10.86263349	7.164260488	8.778684066	18.04806008	7.323495916	12.52205732	4.499135429	15.89604579	22.6206276
AZD5438_1401	11.73433945	5.118569179	8.410598475	7.873817655	19.25600991	3.046156316	15.1627633	20.1091409	43.22044582	10.78385789	6.814184181	18.42180852	6.020367164	9.639906061	8.903698523	5.610599962	5.144720625	9.178253538	6.2724818	13.04014601	5.602479496	9.63482651	15.17103301	2.838802187	6.221226104	11.45255269	3.475187638	4.360646578	3.93939142	3.58210714	21.00279149	9.674230476	21.46036211	16.51950893	2.073266614	7.934376069	5.478742062	5.962820854	10.14478063	6.122663571	6.877324094	3.024240007	8.184868796	14.23186111	5.766292901	21.49479881	3.196159736	19.51494081	25.51392143
VSP34_8731_1734	11.75382587	12.15574315	8.191858943	9.30213202	16.58909321	5.322393099	12.58030662	13.0178045	26.92443658	8.996224514	8.031426311	16.62094128	7.908353848	11.56783831	13.80584367	8.172366192	7.439829829	7.268843143	6.698634354	12.44804218	16.85590489	14.8758595	12.51530372	5.516413425	7.527461356	15.72794227	5.634013507	6.575130318	5.26522931	4.302054473	12.60451938	9.978670631	17.57832601	14.54932418	3.224089808	16.62986312	7.19414656	7.476540663	8.39834821	7.938896312	7.30954836	6.583626224	10.63003984	19.16954093	7.128518091	16.04056345	5.945239504	18.37116412	20.4789553
AZ6102_2109	12.32178497	8.683146485	11.56454313	8.95604954	19.79766543	8.836180982	14.42062727	17.13378896	19.08438218	9.418332133	9.735458876	10.15945603	8.812594317	8.809424195	11.50557585	7.521819777	11.2921733	11.31795832	14.1680102	11.99189006	6.5924444	10.4357025	10.693294	12.11483433	8.144230713	14.78892605	7.524780504	7.716249273	11.15811901	7.300308494	26.62034544	8.102389356	19.25908489	17.38419266	8.935457981	12.39829727	8.763765261	8.607082299	10.11302874	8.008958282	10.1293651	9.481948342	9.881885587	21.75185672	8.113031829	32.5404988	5.286767264	16.43124672	21.99412901
AZD5582_1617	12.5242189	12.64806916	10.21288952	6.911299331	26.92223622	2.736340397	15.89717049	7.661411477	15.49389125	7.788462061	3.632015877	24.04908337	2.637132142	12.11542676	11.26852757	13.20467033	2.807932262	4.389396186	54.33941742	5.475471761	1.330062777	13.63132957	13.64571415	1.621951836	6.375481295	6.020198827	2.639097176	1.139597784	4.750741281	1.573478555	66.72635484	16.79941765	50.54775287	6.883495054	2.289434727	9.637323014	5.8773927	3.350067415	12.75981633	11.03072776	2.907290806	4.195444453	5.570795861	8.85282846	7.875964246	40.63275916	1.638410152	2.283118179	31.87023332
JQ1_2172	13.1540908	12.81556441	19.7318289	5.418155197	12.09325333	7.697314216	7.612424237	21.52348781	18.52777329	7.845792925	8.046139512	13.46760576	6.050826054	6.051531189	4.297207334	4.589404985	18.34205584	14.41376945	36.99288183	6.744951348	3.636736161	5.940853381	11.44030902	8.312594655	7.639365281	5.794769355	10.00869886	11.65898205	17.85514503	26.33667114	49.30581693	14.49428861	13.99775567	12.13922042	5.576815618	5.276344672	18.16202669	12.3263703	15.96779704	11.39979058	16.56604911	7.764598073	12.97970464	19.08716164	9.782881179	15.29897126	9.207732495	4.980887389	20.72884509
SCH772984_1564	13.63694244	13.90806479	13.88999195	13.20285613	14.20266873	12.32728287	13.8190595	14.10644608	14.02751091	13.5352603	14.99159211	13.89748693	13.24076074	13.46357312	13.64817452	12.67759001	14.50070593	13.11415767	12.29745129	13.06566644	15.14972528	14.70237792	12.15878552	12.75699241	12.95419058	14.46197212	12.95253438	13.93127914	12.49062534	13.63902047	14.16409969	13.21673665	14.85565819	14.02130934	12.33621109	13.16366095	13.27072214	13.55946526	13.7193014	12.64216627	13.47085828	13.83750375	13.95470226	14.28663519	12.73892557	14.35281056	14.64231317	14.68612423	14.7259909
Gallibiscoquinazole_1830	13.95528495	13.28498482	11.56123608	16.00287878	9.899348965	10.05664793	18.67506502	11.7623717	16.59789898	13.51853103	14.56228204	18.69952684	9.506790186	12.49527687	14.95114338	11.28959418	8.9190041	12.24424783	25.13528823	11.79406745	8.492080387	24.84092757	16.30785939	13.11520615	10.38671899	11.3641517	11.48230959	19.55402731	20.70902021	14.00552662	21.24883412	13.93756601	15.2240977	12.50397628	10.26730528	17.7053918	12.78335598	8.791030005	11.19407245	11.45332978	11.44071964	11.4278419	12.63183372	19.42981862	9.738293774	15.43888681	7.426830579	12.92129092	15.57694511
NU7441_1038	14.0985386	14.01857622	16.90609823	10.84844161	19.5872461	9.897026364	13.60865181	19.16495911	14.79372904	12.41165219	9.164532462	13.30788131	10.25644371	11.08442284	9.20486839	10.54734173	14.36111573	14.49696924	20.11088144	11.80918686	11.16906585	8.781090878	13.47374167	12.75729848	13.53107894	8.394310284	13.53142077	11.66181494	13.15267438	15.2461039	29.63058532	17.93525141	16.88855816	11.69795781	11.72440196	7.992987249	17.87165822	14.09036621	16.00352226	14.03563103	15.0474639	12.81775052	11.26512771	14.89010687	13.21161929	20.14128013	15.31192613	9.043371952	15.76067162
YK-4-279_1239	14.19492991	1.611151014	9.26619938	5.805198942	19.12321299	2.284645225	10.9902727	17.86294603	24.76942903	11.27579968	6.010385802	14.26835943	5.844907891	9.805526182	10.34277618	5.629069536	3.022523888	11.26396173	11.28994604	13.15599693	1.852128778	10.02032323	12.01011874	2.965906827	6.369432025	7.100814731	3.222984144	3.36352461	15.89312158	5.369510047	74.85698137	9.436522581	31.30413049	10.69326108	2.266613013	18.80669738	11.07173508	5.863018837	10.58586046	5.665720991	6.268105485	4.888100298	5.417512816	14.70141176	4.671382785	47.59200984	1.163959486	12.55174896	35.81605771
OTX015_1626	14.3248221	4.632657911	11.15256037	8.324329882	17.24769929	6.588089804	13.58375492	26.11030543	20.49255332	6.517169128	10.66105892	15.76182035	7.789396824	8.062641795	11.01644751	6.357038696	12.22691102	12.33321936	10.87754362	18.01763921	4.929339915	6.358776455	13.05952172	3.590094585	7.511096652	19.9339156	5.364080097	3.685777339	12.28776529	9.592997763	42.45108851	10.97349859	23.27357427	14.4763166	3.749644771	20.49044698	12.70617225	8.059417818	7.73973652	5.091729127	12.84750254	11.36766075	10.1033602	19.96451691	6.667103659	40.55127088	9.400925983	50.90198991	26.76512845
Savolitinib_1936	14.57951315	10.96717367	13.73655515	10.95071954	16.3497388	6.877858591	17.70112966	16.73059476	12.65945157	20.74415873	9.499021579	13.49789335	12.16976993	12.33288174	10.80572417	13.57095266	7.938542973	14.48381596	17.36552531	15.30258413	6.023231759	10.28155118	20.91838949	8.440202273	14.17043934	4.303720863	6.475714065	19.32893832	19.32765433	17.81895552	27.06252648	21.25177231	13.6512458	11.53923543	7.347930438	14.09110249	8.836507201	12.8444522	14.38193497	13.21540939	12.89199243	6.806853572	10.04637181	13.40153087	10.93372985	22.5267204	5.649118208	13.61415071	20.79791945
Afuresertib_1912	14.65405568	6.276597396	32.96681585	4.344915348	30.40942241	6.728460477	19.59852538	15.76237632	39.01193374	10.15092933	12.24515869	10.9615382	8.126092839	10.5906933	12.14206244	10.17206023	42.92475708	8.132616917	25.44397937	11.46581736	6.328339544	9.903198817	17.63721875	14.49558655	6.896969411	4.034883973	8.914948048	7.308011857	38.21872129	14.13327595	29.96618389	7.098339279	28.70629875	11.73571687	11.95313688	13.2940761	5.604796692	5.925729125	10.06985073	8.664150248	6.600114929	19.00837225	10.05119418	19.37213717	6.365624102	62.84508414	3.312403192	5.421878047	29.76508202
Erlotinib_1168	14.87915846	4.954794443	14.30587734	16.51907323	22.06487669	7.004893489	21.83193838	15.83413993	23.65914081	20.69898404	7.699115749	25.34390801	10.22464851	12.56005943	14.7352579	17.84871138	9.275137476	13.50137734	7.447453826	12.93409232	6.873560738	9.856394887	14.58316305	9.535597774	11.66419014	5.732852314	7.837592316	12.51767288	14.683803	11.28271778	37.99070221	17.39727701	18.8712077	17.11169868	8.002349403	6.858789274	8.554454122	15.05421806	17.82077721	14.35909893	11.56342833	6.478238913	11.36460788	11.43156715	12.47557844	21.76088498	5.266236252	9.823765052	19.41946212
Sorafenib_1085	15.19861018	8.437058334	15.05176633	10.00454408	11.01370172	11.50162053	17.98081586	16.11904831	26.40054744	18.91543547	17.68033419	14.83376105	10.65734914	17.42079451	17.98841367	10.0549325	15.18097893	12.6585394	20.25451628	15.216071	9.814924123	22.37091815	18.28626464	10.12079327	11.96076171	10.72810458	9.099817328	19.23044272	25.16747781	11.36014038	19.26124655	10.61510083	18.32417799	17.19595622	6.678305851	21.24909018	7.853244074	7.948322526	14.61708462	7.552304028	13.64804772	13.27959763	17.34226646	15.7381201	7.69880323	28.50610871	8.135787565	24.88190229	22.67642826
AZD3759_1915	15.49142198	5.356482446	17.47703476	15.5982927	27.19900931	8.962191711	19.11648207	18.95571318	24.7001976	16.62036106	10.1506394	19.47077894	10.50625733	12.8027894	12.72838496	16.6841442	14.44198744	12.1339697	7.917680629	12.34863163	8.447601813	10.97963246	17.87767192	10.18466839	12.18053363	6.434018303	9.188037772	12.78476169	15.78982097	14.86908938	30.59180346	15.00445888	25.40481756	16.28279728	10.61774654	9.490651698	9.920435841	13.7154791	15.55163582	15.84985275	11.41697471	9.831504953	13.9900648	16.20246016	15.37519715	21.75908675	6.84772251	8.749050275	26.43214858
UMI-77_1939	16.23056465	7.637705833	18.08682515	15.81218486	14.59179358	17.25688674	15.08302503	13.00996872	14.37807989	14.84061828	8.733257921	16.67468702	9.18315393	17.21678129	13.48190308	14.80041105	9.366664745	19.06363679	114.0909885	14.30938612	4.584309886	9.154389287	15.69003892	10.54843733	13.4667682	10.80952878	15.18014128	11.43420614	17.55002789	14.34331819	39.46491997	16.56884641	11.81176444	13.22740407	12.53737569	12.78512299	22.50107094	15.55726519	14.54532642	18.42859431	12.42559401	10.91189075	17.9288679	21.22372913	18.70231624	14.57308003	10.94927866	8.275500841	12.54330363
IWP-2_1576	16.60085507	10.00961905	14.37393274	12.17991775	15.49459741	13.23346307	21.30663823	16.3892009	23.27214525	17.40954024	16.55553198	15.77840613	12.91797017	17.91236731	17.18504894	11.84739119	14.48584042	20.4293305	23.30962031	15.23768485	9.695761086	21.72020959	19.93422113	10.47281731	14.06728883	10.05947966	11.46352816	12.85935705	26.96786909	15.19494266	28.14064733	14.51834813	22.33180721	14.23836741	9.137040058	21.73566838	13.96608667	10.38478334	17.98475361	12.62271177	19.02240081	12.55381978	16.89000039	23.20742912	12.33448089	21.83783083	7.590384223	14.4271725	21.53491887
GSK343_1627	17.02480939	16.99674531	15.27612797	13.97487172	16.06119756	13.10689453	19.92222894	19.81613831	22.76003503	17.31810812	15.45542579	17.9383822	11.27999075	15.44906964	16.73141784	13.28877865	17.52268565	18.68613816	24.74412656	13.99525398	11.3883641	18.93992564	17.59779138	10.61400572	12.64988644	13.45579543	10.81048517	16.04929453	23.94309033	18.70132758	31.78985345	18.73181237	23.45832888	16.84583929	9.207496035	16.98505118	13.65731988	10.54791351	17.87180118	15.0149322	17.93945404	13.8315638	16.5235307	23.12551853	12.47353243	22.0583516	9.641107661	15.94458108	23.45267804
RO-3306_1052	17.09206874	12.43986892	18.10925502	10.05382594	19.49127836	10.43436265	17.45804855	26.13944969	18.48774882	14.83334137	6.400017769	15.8502445	10.06795757	11.66492076	7.12254292	9.509707893	17.3155163	17.91676968	33.99758033	9.214411223	8.457296019	7.706777104	13.19782403	16.57609333	13.07097457	5.166647806	18.02112797	20.2485954	25.91429713	31.50971462	42.79800224	21.05541395	16.63299623	8.511584062	12.64521721	8.952215083	30.08515052	15.90107133	20.96166137	16.19405756	23.42894664	17.05958714	19.90923555	14.46685221	15.4928338	27.36694722	19.74558611	5.947594382	20.07225448
Ulixertinib_1908	17.68520232	6.147314794	24.00585623	9.382921107	26.3061441	8.064632339	18.58089354	17.81622163	19.87742938	13.46445959	31.70579809	14.00651943	14.90997779	13.25554241	12.54060051	10.29918211	21.87021926	16.87735587	9.392549122	12.71323965	10.01116627	12.58899901	7.70231313	12.45428593	13.67154095	40.78864142	12.51675572	16.20318269	16.87933648	14.12330789	19.12454368	11.13953587	21.73616329	30.22059188	9.237503981	27.08916191	23.67182595	17.93031425	13.5051163	7.144756962	15.14543391	19.51957325	21.43974089	28.29513786	11.26421561	27.41879085	11.41184754	37.36063671	31.23202366
NVP-ADW742_1932	17.75886887	6.726978921	19.79348216	12.39661176	17.15987472	11.32420021	16.97709063	23.51248673	23.09209487	14.51705401	10.30084234	18.85342814	12.1077887	14.229203	13.04384048	9.623578111	22.65656138	22.44469947	13.51445456	15.71887141	2.976252558	8.220998671	20.0363515	10.24513499	15.04982482	15.97775458	11.96165431	7.311276552	26.34442992	12.4081053	59.0245039	12.65962195	23.00095788	21.74623288	12.63676913	12.74067623	13.44156353	14.47624671	13.02605795	7.912920488	22.97927679	11.1893883	14.80617795	28.17613439	12.92248028	40.92114671	4.395193825	36.91188118	31.26204329
ERK_2440_1713	17.89644521	8.47622075	16.82509397	8.047871424	27.01066232	8.052569134	15.40359592	20.66507775	25.71055897	6.816634415	42.93607129	11.57467239	12.70449453	9.218104206	11.96546199	6.288781739	12.13604649	14.5159178	11.85032969	12.37454772	19.97643067	8.823567642	9.457536689	9.164129663	9.780594345	52.83993172	11.09510171	6.669804237	5.535657196	9.338933264	23.93383235	7.0790022	58.69376313	31.3887386	17.0964765	26.39349713	13.66210051	17.81014821	9.993371717	5.270092907	10.65572758	23.38505036	18.65467157	34.25778899	6.368259857	46.14979486	11.02286697	57.50062461	28.72963604
Irinotecan_1088	18.35530197	3.419938225	18.09326345	6.443074174	46.55637857	3.7085533	17.86542369	41.75829375	48.65226763	29.52751628	57.41347469	33.52087714	14.27807661	9.509632414	11.9088941	7.433169741	5.403452018	8.635703371	6.934354344	12.12477532	9.875725224	25.32298353	10.8699208	4.832248566	7.075644518	8.11138615	5.97131678	13.18108978	9.065885963	9.679519946	15.57039069	13.1388632	64.80567349	22.35660341	2.496328305	59.41382753	18.02181681	8.169869733	11.16229858	9.535773219	19.66925877	16.87154424	14.07580805	37.99613946	2.962800087	37.48504647	4.585971733	15.76010269	44.05548474
AZD4547_1786	18.94451383	20.03000057	18.95519363	13.57450745	15.04133024	12.93461407	21.93013232	35.89572248	18.69428926	26.91371072	23.1237501	21.36690902	12.95963546	18.36714535	15.89561413	14.41951898	11.07816125	14.47842539	35.75219434	16.64406387	7.699686817	18.91473687	30.52876853	16.30176903	15.31895222	16.68369059	11.18672888	15.99202489	27.64900967	14.93970104	44.5099529	24.06915087	14.58079175	22.93908603	8.967856565	24.82234923	18.47398001	13.39206682	20.21179701	12.74436943	13.78753297	10.60807833	14.24869596	23.93730798	10.67209546	30.90284435	6.865675226	19.91794283	21.51276566
Fulvestrant_1200	19.08272682	16.12595091	15.48795236	16.82414244	14.45066659	16.53898458	22.41550607	21.21317296	21.73110891	19.45355157	19.92914936	20.0388036	10.32732014	19.57849325	19.23957583	13.95368398	15.12546158	16.33026387	36.73118964	17.55598198	13.20083455	26.216944	23.51481775	10.8113736	18.08225465	13.87097953	14.17604915	19.53193325	27.99879602	17.16831579	32.54245662	17.92291795	18.99450891	18.67086613	13.04729591	18.71606033	18.55302628	11.61532282	19.3925783	15.11654829	21.15543618	15.02594418	19.79186005	20.59217297	15.8089216	20.89461833	10.9112554	21.09988006	25.70352613
GSK269962A_1192	19.733525	17.71064507	23.70480451	13.15894409	22.14792951	11.51303938	16.58083497	26.45346759	26.67455525	22.97513072	17.08740983	22.09176991	20.4370389	16.25181365	20.43787026	13.31436367	28.79306733	15.93130191	38.36919906	20.26499197	21.00656766	18.23562021	23.35519131	18.18753615	15.5275344	10.8939406	13.57314321	14.95029436	17.83983589	16.20965499	31.72343512	20.47606443	32.43425648	12.51717988	10.04226507	13.01056077	16.3882095	15.37212551	22.10769619	14.4827142	18.67884264	27.1341084	22.20570296	16.17070675	12.550291	40.19097168	16.7518722	21.37698116	38.22664203
VX-11e_2096	20.70177841	7.031973461	21.37514786	8.029635439	60.96300576	5.651758095	27.97777946	22.24279794	31.22910016	14.97398701	32.40739681	11.93838485	16.39187033	12.94776974	17.44092547	9.637691705	22.76811651	14.56994982	3.84314418	19.26912167	15.88086291	22.16087604	12.05075463	15.06698467	11.72859409	33.23863403	9.170832341	11.14178302	9.929685802	4.726262286	16.62758615	10.66230162	49.45858896	22.87047004	8.71393944	41.23471295	16.85528158	10.52370703	12.39239694	6.988725509	11.15121241	34.65950759	18.58465914	33.19849347	9.458893357	59.69438103	10.37620822	48.09135352	53.86259804
ZM447439_1050	21.14984058	10.84723452	24.46715947	15.26601276	31.32338858	12.01607616	22.26080375	34.59944443	38.88475085	19.87136849	7.031879511	27.0204567	15.85761206	17.75161034	15.9191376	15.59052975	16.07947466	22.14478657	29.13454193	18.17059326	9.756773487	10.30799539	26.82268045	12.00985727	14.69414575	8.340813738	12.98038914	9.360830128	14.59481437	17.75078004	51.1555061	22.90008716	34.16623653	16.49506881	9.095620424	7.836734309	21.68117354	18.75959297	26.40400701	24.06802401	20.95426378	10.90635186	28.46579868	20.01438994	19.94998372	39.71628217	8.925890696	14.56435526	44.62177639
Tozasertib_1096	21.45093414	5.200635908	21.56774573	19.1769108	37.5081132	8.525290449	23.34442436	48.46271094	34.15446145	20.45123063	6.428779297	30.71638047	14.25611187	15.04381293	10.88546729	13.3208944	6.892473254	21.45965204	34.11927081	17.47714568	4.880175691	7.293702341	23.98223415	12.62710969	13.52135606	7.523606332	14.91246235	10.34653681	18.91626418	18.15282466	51.04798657	23.30235293	27.63763328	19.50779767	6.383273021	12.77954534	45.2881213	24.69732828	21.8776972	18.37075711	27.83277181	12.44295556	26.28512186	27.72292947	19.32716708	48.77276388	6.609414179	13.08484575	45.36520002
Uprosertib_2106	21.81882216	11.80417697	27.3189788	3.678970392	49.49217681	5.541688224	37.03628812	15.51994245	111.5601898	15.55307783	19.83186598	13.88438279	11.65037678	12.33416892	23.16541329	12.38988024	95.15929686	9.787897948	14.29176658	17.47611397	6.49985869	20.69246649	22.70826003	25.3385698	6.738599895	3.365878444	7.93808568	12.44993607	49.36003448	14.20282687	28.14490374	7.476938904	58.65731342	10.01251172	12.37939356	41.12857942	7.097709787	5.29796033	9.513537021	8.475142334	5.223481629	62.99524808	11.56373305	18.44770045	6.303474638	136.8319571	2.55199786	10.59789403	74.9175188
AZD5363_1916	23.38107599	8.390163044	41.47482198	7.239254244	74.02315636	7.643067311	23.05035648	25.74913668	100.2484765	15.95150801	17.60371317	17.71543608	12.97655326	14.19987948	18.28244352	14.19503624	54.93364433	9.385293471	30.83949959	18.00848637	12.0568575	12.71830182	38.20625355	18.0644634	9.410115103	4.985975546	11.11798117	8.358902167	56.73859556	17.87529301	69.6989978	11.41466525	71.6415207	12.18366182	16.55105339	30.40387144	10.37637495	7.460513885	13.451311	15.29418348	9.739971285	34.65703167	12.06389256	29.90330284	7.478470135	115.3929882	4.711004007	7.776170902	78.00052538
Uprosertib_1553	23.53272192	21.82560194	27.26020998	5.101373989	35.74292267	10.52916183	34.13019512	15.6885974	72.15199685	14.02058067	41.95064003	12.44393232	17.10970385	15.14925818	21.97192157	16.79915116	99.30609161	14.3560789	19.45188076	23.67494461	21.30321216	21.42069219	28.49239684	30.62457077	9.80247172	6.616055101	16.95783523	14.55084581	53.86420782	33.85315422	36.85011861	10.56276105	60.64540269	14.09158432	16.53374127	37.63588061	7.344175355	9.990497486	10.25914222	12.29083373	10.18550263	62.01346034	12.34428392	30.43726334	7.825654116	75.2651397	7.526464944	11.07837034	55.07840758
Lapatinib_1558	23.56689709	9.827398428	24.97880688	21.73851639	19.64806776	10.46214016	21.44783852	9.547111484	27.55150454	31.01463881	14.44327259	22.24206177	13.36181485	28.74497632	48.85676598	24.15659666	39.81965953	21.12356895	9.802820069	36.87642013	12.27944107	17.04665752	36.32274136	22.59117696	23.07822937	5.768929381	13.74657219	15.75088204	26.05238024	11.51240886	32.18343198	13.39575142	19.36245674	24.40678037	14.82205515	18.43026417	2.289432281	15.3655027	21.28807151	15.19145925	9.237536779	23.62969766	11.13154835	9.140520301	20.36822956	38.10362444	7.223969345	34.65803177	53.81462178
Axitinib_1021	23.91388544	14.4232827	27.14369898	18.78432104	29.65304984	10.34653661	24.8284387	43.94699736	48.5908316	23.81817482	13.80892871	35.61003681	19.52023191	19.73376878	21.45079419	15.29604032	17.18563195	18.47199588	31.3143939	22.3754206	14.81175961	17.67359439	28.82093111	16.02028055	14.52887646	12.60051765	17.72221848	15.25443855	15.71578225	18.25302731	39.33817817	21.51126499	35.52337949	17.91921162	8.874553268	14.64629113	37.69986039	22.23097272	23.91261704	18.81914285	25.48054446	20.90884721	29.80440726	24.63632954	14.98563545	52.33139206	13.56825678	19.80652186	54.0429129
JAK_8517_1739	24.4444311	13.04899954	18.27380892	11.16721212	51.31579234	8.565464103	19.82404704	61.34216432	50.31376429	15.20978284	30.27286946	20.23615936	14.04748492	12.07628003	12.02637161	7.823299859	21.48002106	23.8847026	23.32174959	14.52443299	6.519976559	13.23551444	34.62738618	20.56769945	10.26413448	31.62567765	12.33839836	11.01174574	29.21313632	19.49073967	148.5852487	13.03815887	67.08899671	52.98976951	12.8538805	61.44229578	21.22693975	18.09454415	21.37703431	11.26213512	23.48616552	10.58193811	13.56887302	77.49950553	7.955142195	132.6525593	2.807244536	24.38174742	49.86463063
MK-2206_1053	24.49593027	23.00249761	38.77093996	8.000377177	39.7864394	9.873980527	24.72237534	18.57825165	76.34023186	16.57579224	26.06939086	17.83947094	12.70448865	17.7875881	24.29014414	15.03669174	123.3734395	13.62946112	51.24157527	21.11648667	13.97814004	22.44167815	32.68662787	24.58311907	11.14661644	6.82135058	11.92041262	12.36741726	48.17087946	15.47693605	57.45495182	14.14577478	50.25608305	12.02516951	17.33103483	24.30859361	8.755013174	9.314957202	15.66515913	12.67768502	9.119404921	53.26396192	21.17036668	23.18185273	10.50194767	99.83152928	4.716835048	18.07785804	75.96168536
AZD6482_2169	26.17629838	21.09960934	39.1879226	14.34644949	33.59880368	6.156740007	26.90320277	23.66117715	33.4422288	17.56980849	14.74692166	26.79215149	23.48263986	16.82515006	15.40995012	15.12065708	31.58313295	15.78095736	48.9609931	17.96209159	13.28025172	19.3434128	27.90582833	25.6042063	14.48149554	4.726879227	20.65464554	26.97437616	39.01268494	29.33852187	70.90144729	29.17530267	37.20269339	10.90424121	8.666052634	12.41489677	28.0389184	20.79815825	23.31159203	22.72050481	17.81492866	30.49744152	25.32843841	24.15727885	14.43588804	54.60762249	16.55506295	5.643053115	33.24313016
PRT062607_1631	27.9637943	15.65533799	41.17096981	18.3701118	32.5162161	13.6653503	28.43575983	51.01874477	57.00809275	25.01556098	38.19286825	38.02757858	15.78439531	23.15705124	22.83529489	14.16117508	44.10543345	32.15846678	23.92000948	22.08186017	17.2216262	20.09372434	27.83147185	12.87133482	17.11796436	28.17168991	12.95045255	15.9798232	22.86510101	26.70038285	47.82161226	25.60792498	58.11990634	26.16789381	8.458860428	23.8861809	28.96924491	20.75193633	31.4640378	20.467029	39.06335064	27.74823804	29.36043702	46.90488559	16.10487525	51.43716527	15.10954208	32.13931961	62.43588017
Crizotinib_1083	28.0258827	10.78996854	24.71098708	12.88250982	39.88596275	17.94503512	41.54805235	38.73642797	48.29035705	34.69597157	15.10029795	30.16451656	25.00908564	24.6179508	22.11243448	14.51754071	14.21834666	35.85871929	32.45825852	26.71748269	5.934742724	17.58879539	24.00228238	13.32144375	17.91565192	17.97848066	12.97630178	15.45410793	24.5820534	22.80073046	61.15334292	22.47576272	66.76653443	30.14434044	6.81772664	30.23032874	24.48383858	18.200724	23.04043232	16.8555979	21.78059376	15.86233329	31.76051677	50.16039034	20.47360441	69.92184479	3.72752127	21.79004912	57.13167887
Gefitinib_1010	28.24254339	10.59489108	28.03672257	28.17818407	44.81427983	14.35004028	34.57584819	19.97688093	38.04346235	37.31627584	10.43479402	39.97278032	18.81515379	23.3854048	32.89439942	27.45015365	16.85871629	27.28744834	10.96677035	23.80062379	7.944478212	23.47048811	33.45081167	16.17736539	24.99700672	8.719980347	16.12496247	20.33856054	30.58929716	20.83292006	76.18591579	23.58619328	49.42820032	31.76605994	19.70392804	12.67230206	8.451861123	27.30615079	33.56379477	22.32358084	23.74882231	12.49348274	25.15692456	20.98757051	24.98520113	41.12039244	5.390146094	21.40823034	48.40356608
Pyridostatin_2044	30.22905236	18.10142206	43.52195725	27.06832025	30.14619365	17.75700323	34.28066719	32.6472588	51.41032275	33.18727998	28.71416177	43.90775103	27.58330144	27.48853362	30.93775313	21.07058797	26.6310996	27.91183894	27.9857996	19.63475921	19.73943213	33.98256423	42.78029041	25.14923088	21.07277043	25.90812141	18.98738511	28.0776283	54.64220351	28.2266397	27.07803691	23.85944326	34.55925342	26.56873036	15.9718374	39.81392879	38.15130584	23.17756307	22.71390708	20.72879084	31.75026203	38.0592031	42.04053234	49.50036843	17.44288476	48.92350806	7.905533524	20.89816429	50.80170581
I-BET-762_1624	30.27108871	13.03468917	29.1611088	28.03985457	39.57281731	17.79520971	37.16196528	44.6245029	42.01655181	24.77873337	27.84908315	38.78342751	20.44129186	24.29145778	30.73591103	20.73856513	24.87167643	26.37501626	32.85167965	33.46472085	12.13913497	14.90837961	34.42288456	10.90476085	18.01040107	31.58180681	12.72050743	19.71795894	28.77534813	21.03846868	68.03296192	33.21360421	42.51700407	25.55310711	8.02595544	30.08022499	23.9879121	22.6559134	19.49460842	17.36852495	30.95764225	27.8038158	27.50714747	38.84486687	16.53859982	53.79508249	26.65660311	45.76894581	66.11737692
MK-8776_2046	30.64316963	5.408516806	20.15074628	22.76132108	26.97583414	7.479567406	30.4146585	34.66815925	39.62670284	61.55283525	9.277460966	19.49259417	10.50171682	39.65780554	34.92225302	13.10977987	11.3181416	36.57794263	20.08366796	39.16793443	7.817014132	14.30111017	64.40109024	4.449054361	23.11290672	7.078961005	7.263928583	14.81331842	19.51055381	8.126170254	87.55109306	53.8023604	55.04119371	23.15914396	4.01238593	25.40905194	12.9314815	17.54966164	42.71908206	31.41880075	20.12282216	14.97612759	17.45129732	52.64640287	18.67369072	85.05032603	1.852196773	25.88881627	57.72515277
AZD8186_1918	30.78439078	25.58214646	65.9587984	11.01845537	123.5622691	8.511783913	22.17076934	37.12886023	77.66917269	21.11407708	30.04196281	23.26202925	12.60235683	17.45502623	17.63058044	18.14336324	86.62812065	23.31569398	51.29895399	25.11060841	33.20750654	26.9861047	39.83249102	23.35440394	19.34112413	8.682400791	13.0735402	14.25707473	32.80845611	21.87800379	82.44415133	26.83227386	82.47647357	20.89713209	25.9501474	19.12770107	16.48287224	17.85397309	23.14308119	21.68043381	15.70132097	28.61564207	16.22521762	31.12213912	17.47707044	74.44126387	10.82908986	23.33008874	87.55003745
Talazoparib_1259	30.79268133	5.556824352	46.55223547	18.29350368	87.62633304	5.253641209	26.63916751	50.62973355	82.95753458	42.64949499	37.52707758	62.99463823	17.45041594	18.09805042	20.68197615	10.64919899	9.449226126	21.11039719	37.46691436	25.90888353	14.97432417	25.21964248	31.99831965	9.976193911	13.37445968	19.8564835	7.477054855	22.01485635	15.32714018	12.91101828	80.686229	28.66712489	65.60859102	38.81593745	4.468003835	36.33389184	35.87901603	18.68792466	20.54957283	20.99695076	25.85966596	24.22345417	23.77332723	35.82529893	10.39036347	106.6751167	3.998314941	24.20058213	121.3696625
BMS-345541_1249	32.0775308	17.10320553	21.67633965	23.09993398	27.89272043	17.9090089	59.01356999	44.59339383	73.24117161	33.52988329	26.27036868	44.46166419	20.06377303	36.33817159	27.50748651	19.44872018	13.53490243	24.25878243	37.02380518	23.03452824	14.30419191	31.18067274	27.34743149	13.7852274	17.42653821	34.12977822	19.61611016	21.98720645	33.1080895	19.50216219	43.61382217	24.33703186	45.96358545	38.22154082	9.152767599	43.66189979	23.55189381	23.62615602	21.1376471	16.47829373	37.7330291	17.84668397	39.20989354	73.69276874	20.84623092	44.0114673	11.8603528	35.72549289	50.63431037
VE-822_1613	34.25913066	7.518855292	42.26197742	17.57669152	31.06003785	12.58821869	67.09351754	39.3347402	124.6148704	61.06502671	25.77226983	52.25389407	13.60289543	48.96326139	33.97626001	14.65457584	18.20514302	45.11331987	13.82500473	41.16641905	7.234937432	16.42223076	31.92270357	9.702025757	17.15563942	27.13954244	10.56217499	16.00827716	23.26433692	16.71987153	49.47237957	36.96230335	50.8399657	37.41338841	3.338767155	36.42914318	22.01220473	12.16788303	38.09442396	24.10773859	32.82310864	32.70387031	20.75563228	60.61626614	22.46224277	40.86615903	5.431146369	30.48868156	77.78223899
Elephantin_1835	34.80970508	52.12418344	25.77682322	19.49729976	16.62472704	31.62431248	36.93152224	32.85813692	46.63909823	26.99051559	44.46795636	38.01450999	29.38304641	34.9132114	47.2753161	23.6816692	33.37514046	22.10864348	156.9938874	39.470243	59.33693033	75.76911497	31.61206909	22.77904337	26.75440538	54.3680062	22.60181425	35.72757988	35.07108233	34.5084394	24.53360521	25.85950014	37.89564708	27.50797428	16.31537017	55.66839203	27.81280242	19.43661577	27.39495417	21.54519368	26.30765213	56.01130839	38.70965746	60.19134299	17.83020495	25.1240367	20.70514545	44.29261863	37.98022125
ERK_6604_1714	35.73251745	12.91232241	39.0771455	30.12565578	51.59010484	17.75096889	32.72045083	42.33512893	44.69132821	19.86944869	110.2164032	33.36591599	36.02752906	21.97808092	28.58644749	21.32111475	20.00872288	26.63584363	6.670577008	25.86940221	18.59389133	20.69272412	22.84358438	22.61663699	18.40402056	109.3344217	21.2201491	16.72675822	12.16545165	17.59378401	35.08655516	21.78038281	89.26499256	59.42074347	18.22545144	56.56931604	33.44681465	36.60564192	27.78536602	17.52655395	23.87076298	54.28512855	34.93172755	70.64484536	12.40596173	78.47703349	16.90848327	81.92114265	75.56164526
Tamoxifen_1199	36.91391719	14.07400014	52.45865238	31.76221162	37.34915793	24.9633358	52.97905748	39.68959769	67.05406478	35.83264187	23.37581554	44.95816857	27.93341855	45.12922683	47.31943174	29.18695086	33.64909839	33.12811781	30.21502173	48.81159256	18.37028242	26.19391057	51.22774951	23.49753182	41.45355316	27.77442464	25.60320127	33.54665157	43.43590472	23.21267167	53.52046758	40.33439307	33.93800703	37.4204606	19.30514111	31.22753181	34.073206	24.89264621	34.60969146	26.95062267	36.07374505	25.56113474	39.62437792	45.02106959	29.5311749	48.89495967	25.19746159	57.28910316	43.80248053
Cisplatin_1005	37.18461666	5.836524167	42.55732248	29.80901277	71.12154705	7.542739566	41.1808436	56.44530179	76.98367873	48.90707232	31.27441684	89.60502255	17.03144545	23.2819858	35.3152374	15.43534143	4.368531093	17.01745086	19.1540881	37.55785006	12.64723723	58.78193139	40.54906857	5.787815022	13.61905307	16.93917676	4.508574028	18.29005178	17.46338287	9.584230905	49.29464411	47.29396031	155.6507714	22.77110303	3.319134205	37.55637777	19.71339783	15.10362182	31.19508617	31.59686968	13.24983783	13.87224853	26.53085322	33.85413663	7.622428723	109.8167787	3.752627935	32.24268464	116.2234005
Sinularin_1838	37.66040516	32.59967458	29.16513919	37.64388481	26.80941696	34.87249857	47.826741	23.12692693	54.53007381	31.34169794	31.77272294	43.61450405	24.68027426	43.00507081	42.21325622	30.8925073	27.19194454	41.32194027	92.19556381	34.34765917	20.91172755	55.46443725	40.22253439	27.88480352	29.91383488	36.55133231	33.97675769	31.44535854	48.49057464	43.18709119	71.85586353	25.0471263	33.90380922	38.80482375	29.0551724	29.04342775	22.00561198	27.38870986	36.77292304	28.65497019	33.32822396	31.27544907	47.58577607	46.70985651	25.20268396	39.30006209	12.68763854	45.95245873	35.46320904
Ipatasertib_1924	38.6320827	22.88936211	62.53678788	12.4725934	80.73952788	16.8135483	37.08252651	37.31561436	116.9024252	24.72303126	29.35545571	30.23293468	19.52790688	28.86091147	34.7277815	27.4909437	111.3372719	17.57113767	66.61329034	27.02975307	17.13048936	37.29885768	53.49373102	37.98428038	21.34239564	7.606374836	22.79619747	18.22522773	121.0254306	42.42923964	59.16304554	21.35672397	54.02069357	20.82538821	34.82494926	48.34093144	17.64662737	14.03395987	23.04173443	28.34684921	17.18525975	58.76633192	21.02929203	46.54356452	13.88089035	91.24779706	11.98644308	14.17914888	75.38934211
Nilotinib_1013	39.94305011	30.22486597	35.79440783	17.63888935	26.48392633	42.21625786	66.04757045	42.78944342	56.93496441	39.78553631	23.18831163	36.21167638	17.5161868	48.56264725	44.47728442	19.981114	43.91653295	30.84728972	76.48310043	35.68990762	21.17706189	42.13444786	47.84392617	27.49641872	36.82242936	35.07592209	26.33821576	36.925994	69.23500277	24.10169757	37.71263035	30.002521	42.47605126	30.73879108	15.30885349	32.23827441	26.0675875	10.09911525	33.84083177	16.0516599	23.97272605	30.63495185	37.94063348	55.06004256	23.24343489	52.72841806	23.45523437	59.25335189	39.49417392
WEHI-539_1997	40.03711107	4.982411441	29.54054564	33.12288361	56.89869279	27.24802097	77.86272779	40.97553111	38.65527743	67.90321866	3.735334906	39.2834414	32.2838674	44.59422905	38.99738148	31.47648537	15.68299828	26.54158066	85.66040727	83.48208531	6.114570925	14.25417729	54.69143155	20.61270184	38.61856444	17.19582937	15.66606159	14.5107675	15.04243821	9.363727437	63.3096811	54.0335702	41.03646384	37.92168715	7.451472293	6.489168448	44.33569214	24.29820653	47.30266482	39.82405013	26.9565261	13.42144084	41.6289278	51.68878392	48.56858354	52.28477447	5.330818851	26.71940219	49.70926677
Alpelisib_1560	41.71388009	28.7893035	45.30881666	17.54069225	94.52701033	15.97248449	38.69866318	23.68060556	78.17548123	31.16398562	74.13168508	37.32143087	17.81030763	29.73972328	26.20308985	22.28885533	101.5134101	29.93491545	34.86195965	32.13755931	11.04516981	38.86507089	39.5919613	43.34070012	18.27162693	11.68448631	30.45950951	23.19617485	81.46478649	55.99641666	213.5971713	16.83576161	80.86900152	58.80519977	34.22559619	84.11754807	7.719803029	27.39790474	35.91631934	22.23055692	18.68070005	87.6660482	19.05675835	44.57998458	24.34227957	82.42444341	3.665482976	29.16480816	136.8450071
WIKI4_1940	42.54294632	33.66303267	49.36130538	40.08879875	51.10029839	35.90845969	52.07349629	53.0001215	53.59221501	43.50556661	25.51681771	44.2935528	31.06134484	40.18998072	49.8083142	33.04860409	32.06671905	43.42260088	56.07092257	49.14982628	27.37992594	34.6285499	48.73455644	26.24639845	37.94179959	42.44355462	22.48158324	25.88595536	30.18210674	26.52000707	72.78887346	45.07441548	40.77966309	62.06629061	27.2956479	34.73998222	36.11144241	33.44165412	45.76239779	37.53687046	31.76522113	23.93622085	47.56061467	49.89656692	41.88936561	59.71789334	15.14342474	55.80568288	74.64093181
GSK2606414_1618	44.84695969	28.77484845	37.47029682	30.99495144	52.30791716	21.59355707	48.14531555	61.32041688	70.32542134	34.71798708	59.03991097	40.98330477	25.75521334	36.32264885	38.96963645	25.76111907	58.65433024	51.76834564	74.51326457	33.32480263	29.84179282	50.76238034	58.69213953	27.51141496	34.80609352	40.2112162	23.79149555	30.41937404	55.63324845	37.55187739	108.0058663	36.8939898	71.32614537	54.51094721	19.85775463	47.09708255	36.67941392	24.52434375	48.5189429	24.16021423	37.2165348	29.07761211	41.55301484	60.57843467	20.3863817	90.20274645	22.40547877	57.6921502	66.53422031
Entospletinib_1630	45.22775732	32.88012011	48.46561329	28.7382203	83.46361217	14.92454646	48.44923925	79.15149556	75.27624865	38.16342877	58.47448378	44.79329433	23.85085845	29.63638348	35.04092625	25.45451951	58.33948868	44.92736434	39.88450535	41.85349462	40.5778902	42.26846393	73.05255326	20.90614681	31.73437831	30.01077807	16.33572118	23.94991768	33.42103374	40.32182895	89.01068658	47.90803847	96.60409844	36.83389847	18.19418566	54.13541197	34.30759715	28.02025697	48.86761404	28.88813636	44.92382861	34.11484022	37.44809038	68.26372061	24.06107375	73.73706311	26.39160207	57.7381542	84.91124247
Zoledronate_1802	45.86656472	28.72015715	47.35340331	33.51305067	40.2283272	34.04208101	62.62487001	56.63494575	68.98017849	48.17746603	34.56854085	56.34290078	29.23831076	46.74748842	43.18724058	31.74528395	30.37538664	54.90115574	95.58579942	41.09413837	22.15740928	42.19633062	55.90521565	28.13335066	39.54863358	30.63685645	26.19282722	41.4729056	71.3515967	36.95826026	84.23470348	45.7992537	61.90653175	46.34140762	19.86298962	36.12336347	41.75322579	27.07943247	47.97073278	34.31092375	49.41256816	28.18144561	52.77181413	62.42097154	31.88288349	50.07448204	13.75387692	57.04349834	62.24477865
Ribociclib_1632	46.49206205	67.01196603	57.02204027	36.99667818	46.27407346	25.08814596	44.32122438	58.46618174	64.85936603	46.30850085	64.44295197	53.26446156	41.83413709	43.28601574	44.76893551	33.35659632	67.46818822	31.18783566	50.70521235	45.87488945	67.23948473	55.60103404	56.308568	36.51631436	34.58034797	30.27559093	32.55917921	50.26391472	44.96508758	47.35086047	59.62638269	52.03067998	60.14441267	30.2592506	23.48274255	36.87502881	50.98584089	39.28537341	47.91471833	40.09563397	48.71041231	53.26032934	52.32786026	53.66590748	32.13574426	53.93251938	54.82071113	38.40758238	67.58061616
AT13148_2170	46.54337579	28.12002852	65.37689236	27.44570622	148.5609187	19.57068034	51.35797969	58.04775516	145.5598597	39.26153113	21.94383926	49.314428	14.22463504	30.67467625	37.85667922	23.485879	49.56584877	29.94346724	51.80371873	46.04009381	17.23225888	35.13949073	57.89939985	23.76917971	23.2448571	25.6794989	14.41768518	44.98816852	96.82481597	19.65741839	170.1730307	36.47705335	85.84243572	31.89291241	19.9833745	81.60874693	19.51463015	21.51539277	30.67585038	24.06064439	12.80975034	45.96323074	31.04371883	30.14104962	16.78525131	191.553771	34.69361591	28.37818922	117.1355703
WZ4003_1614	46.58284978	17.75933466	52.76551415	38.0896586	68.8482596	23.16491901	43.35130219	76.82794359	86.99485183	31.80974757	44.08935292	45.89921463	26.58805675	33.65534632	44.53141759	25.88244437	74.77300162	60.85346623	35.49478122	53.10539732	27.11218757	22.21643227	65.84249111	15.79918696	37.57031173	53.23375893	20.78033082	22.19575822	29.86367496	20.4683305	100.9456663	45.52334763	100.4790238	46.75989294	16.13343851	33.82495274	37.0318807	35.44854068	46.33859457	29.15383591	49.01033794	30.22415319	49.09459145	53.88839051	26.64845503	115.4513674	25.15410404	103.6029517	92.95561882
Palbociclib_1054	47.01562871	26.32285123	60.83385652	30.48657068	50.03973369	11.47869368	30.78246634	65.44171232	109.8217365	54.18617802	140.3545845	57.18617072	35.63269235	30.88580293	57.78261453	16.95510655	117.2809463	24.55157939	30.1974005	39.45423277	61.56401335	52.81830991	37.49129097	27.20929477	21.00515255	50.74249594	17.41663547	50.73684929	52.95888996	23.2046068	31.66800057	23.68761291	69.51261417	53.14796398	5.297401327	97.68553108	28.63412326	24.43675853	31.72683533	11.42219486	32.69756586	99.88919827	33.63243675	75.71500734	11.92729361	126.8297026	16.1303678	143.1901169	128.4526374
Linsitinib_1510	47.69812527	19.78576446	48.22643236	30.60585027	46.63407955	30.50037519	52.23948441	45.73648072	83.87460128	58.24066841	34.71403594	71.36608841	32.48563429	50.24321085	47.85181352	31.40766726	68.07857722	54.09933099	43.79910676	41.72247637	10.27979477	34.59647089	35.35543206	41.65769047	37.63238366	35.7348326	33.48717913	24.17562908	45.92902245	33.68212654	139.380763	33.38001051	67.03594727	54.37311074	23.0042251	54.59817668	45.5987339	44.6215826	41.90619322	20.90770999	51.88672392	49.01522242	56.85688898	63.81588849	38.66101629	99.47537127	14.9817135	69.91814365	104.2394981
Oxaliplatin_1089	51.39166733	22.39910424	48.35422226	23.02936144	74.75145723	27.05375618	67.56464557	56.36303298	119.0877027	62.11394772	177.1361395	72.42934096	37.86698494	40.99944859	51.70022835	22.88152536	34.98696299	27.07613829	32.60034152	31.42237779	72.58036547	122.3632544	29.98951487	24.86554529	23.3965902	40.81332453	17.44213463	49.66359398	75.79145408	39.12467964	53.78550875	37.95619586	188.4177279	62.57049262	5.947267365	161.7766536	41.52766993	25.69283207	32.81361262	21.21103056	39.09516912	53.49253775	47.9238927	124.7191298	13.35028316	75.34922189	16.28401451	46.94209822	103.2750263
TAF1_5496_1732	52.27589671	25.26263886	42.77291233	50.40405816	16.49872845	51.72448846	69.01032999	41.11753995	103.2381215	56.77831158	33.71927721	52.1799665	74.67179811	76.46777517	72.66078244	47.02081099	29.63071669	57.44654696	81.92794889	80.05669509	43.01640129	61.57545127	67.49268757	39.23622648	36.27593975	30.31954566	40.43729284	50.1632712	94.89235036	47.68562084	56.41729344	36.45405262	41.19073539	46.27435294	38.87173813	47.43127172	25.38873117	43.54845501	53.71548355	35.43529185	43.52433996	35.53072571	97.11783625	75.63884104	36.32334851	39.18286969	30.3633811	85.40902045	36.54493909
AZD1332_1463	52.71719136	41.89550388	51.81799428	27.07956519	124.3059508	22.61446997	45.17012191	136.1472894	85.3695722	35.67467934	97.93381748	41.54049075	38.80503496	26.81689934	39.60055468	19.59721741	94.83676742	40.5571295	27.66804488	40.45539778	46.14971905	44.69830831	87.05846426	55.32097733	30.3919536	103.1293084	35.06917572	27.83635268	42.86283326	31.31957488	99.01208092	32.62050455	127.3686031	93.66523885	26.04196053	107.5007161	62.50122251	27.55226702	36.87054259	22.25035351	50.81003266	34.0196826	39.03231782	120.5594937	19.20433506	118.8338167	20.40876205	93.10930063	115.8561764
MIM1_1996	53.535238	20.78125947	78.38750916	37.99298426	61.91621867	28.31315385	80.19142049	99.20450746	63.48996583	63.16072908	28.59972979	72.92020541	35.13011743	51.28925008	49.64068774	40.88510853	20.30482972	41.73786314	93.22358621	52.26983551	18.4255926	29.00926862	76.45712541	41.02824718	48.22567433	42.67257799	25.60953184	29.42975665	39.65941203	26.56736804	85.08039664	61.66255004	69.83835781	56.17183799	12.53924087	58.31310951	59.17485955	41.35180633	46.06643267	42.85511398	43.40485279	27.38170981	49.04603458	74.31589917	35.73492416	90.42685294	17.66168459	33.78899423	86.87664085
PF-4708671_1129	54.26379985	36.07724689	51.58188232	34.05532682	67.11757495	18.81131491	37.79166162	52.98072021	88.42072454	60.41868472	62.05454439	57.86283862	57.68978818	44.95295601	69.84481154	37.10197971	60.53166084	39.33734577	67.71190809	63.78034935	60.72007691	58.378275	72.21884307	37.80547013	34.04740012	18.84995305	27.26470967	35.25991917	33.21745523	32.2107491	84.25159275	49.27544275	118.1275847	28.15717833	20.79121145	37.66474362	30.21617587	42.1137891	66.97240475	40.9441767	36.29452934	55.44974635	61.67610578	27.03559698	30.06240732	154.419302	35.92459065	62.26905229	126.1027814
Sapitinib_1549	59.99302519	33.13039492	71.89575614	52.46687083	114.1399973	21.08786274	57.11167921	17.99101575	119.5348159	79.01464171	53.7571237	81.03342038	48.3139354	51.10055163	95.06919129	74.39453115	71.94712926	58.26760996	24.93686269	59.50181985	34.59945486	49.05597744	76.58797699	43.65573417	40.99022608	17.1835751	27.44438097	29.40413029	45.0697928	33.16191356	171.9694163	40.97285719	135.9823181	84.14668227	32.45637588	43.16266424	3.042930532	44.94187422	60.47192751	43.16363708	27.08262278	45.57700159	26.00117655	16.48922071	47.20797602	71.64756563	15.57096815	52.72002563	101.6205743
LGK974_1598	61.13899977	33.53824285	54.97501877	42.5024181	51.70445326	34.38868505	78.47492815	57.56957049	126.0639368	56.77470824	67.26442953	67.87796029	52.33957758	77.23556347	81.54263986	47.6395956	43.12733041	47.1762673	83.31144218	73.75415067	58.76459508	84.33380395	93.11178533	33.88650955	47.81294388	33.97129798	38.75766333	42.95664039	88.77570059	39.49414704	103.8690242	53.1080115	73.9111542	49.87270403	28.81708331	71.34842014	31.67301598	40.40427116	58.94015557	37.83717594	63.3200032	41.65017845	74.55306256	65.46374927	33.52398305	101.254796	27.69180261	75.95152906	73.00286607
PD173074_1049	63.59113644	36.94024541	84.55897106	52.69261507	80.29258404	43.79312853	68.31162541	102.2289329	95.51153996	57.73468937	35.91978055	74.70626686	34.28323705	56.79810999	51.1024642	35.15271389	52.91962514	57.78569602	91.92281809	46.97255394	24.09407796	56.87298575	107.2146123	33.14988649	48.09540344	63.9527448	25.57878114	43.26253078	96.82939327	46.13858667	170.9587465	66.3643519	68.89443791	58.87109387	25.23571349	54.45462872	59.93812228	38.96164835	69.89530895	40.69250816	51.15073754	28.33380323	65.06409333	88.01466014	35.80216225	100.3618736	13.25480078	67.20433161	103.1587589
OF-1_1853	64.43685041	38.40131398	57.55803691	61.05832821	48.1091459	57.27316199	112.9771805	64.41764647	107.1918192	69.27055261	50.91131446	85.83763332	57.64226014	74.38967426	65.53925974	55.32558755	45.89082774	59.82806748	101.0315526	60.75371563	36.63703417	94.85601318	76.02333309	52.35005156	46.73126365	46.40551475	46.54061009	64.42441223	99.25572155	52.37350034	109.9623632	61.16225888	48.16875714	76.78952682	38.56789522	62.49655659	46.68483071	41.22556137	62.19745809	46.23247273	55.6924281	37.17484985	92.58239534	88.75242174	42.12825018	58.10989645	33.2508771	72.88366403	50.58788506
AGI-6780_1634	64.59895193	33.80811828	47.94282246	51.43557017	41.8000971	53.87579275	110.4270035	85.00626922	79.00948257	66.65150078	40.81968547	74.82569279	50.74122243	70.95662749	67.98763811	56.43925284	46.36758328	69.80509757	97.83499815	65.37619572	32.14902264	65.24688192	68.4906175	43.65502014	50.51673868	46.74168383	48.92836459	69.98551538	63.05720359	54.72524299	88.79159794	72.69970707	68.03383685	59.71856981	24.32370273	69.74572587	59.26579661	42.05382124	69.15324368	53.30009542	67.7687251	43.65013363	71.81397025	86.36905249	43.39892937	69.90674623	41.19331382	74.74926199	66.62198268
JAK1_8709_1718	70.45846433	49.27448523	68.50806753	42.30044271	85.67091646	45.16362527	85.08438564	106.1502375	190.0799922	59.74993448	119.1356867	86.15242954	46.62082952	67.21913147	59.15720676	35.47244166	76.09296025	66.68610672	74.19860748	54.6754417	63.10888675	74.50179429	90.06009177	32.19745687	50.66705566	72.49564536	30.26818503	43.70807953	54.02569205	59.68646419	161.7703377	60.92716674	117.3442567	104.5272254	30.23313096	60.51906522	79.84334676	51.73508392	77.15060461	39.59150449	64.99953046	42.75575521	105.2155317	129.880515	29.2654778	155.9087974	22.70677997	133.869812	122.8865512
Wnt-C59_1622	71.90634906	43.79244012	68.3007645	64.5481196	52.2707642	54.3822867	110.9319585	59.43582915	125.7499456	63.48689443	59.13478654	88.16317284	71.39576143	84.7060058	96.12934553	52.09753143	55.3243487	64.64591102	102.5812189	77.22613868	46.72392556	90.58755713	92.09747159	54.55601417	54.71656954	57.97184612	43.35467146	58.79554231	108.0763562	58.3652131	77.6593037	61.89566468	98.50722713	63.37434201	33.34049267	82.40774823	55.38174406	40.63798131	66.68698295	47.53505693	70.04163879	73.00654789	97.53093295	103.0369686	44.76323352	73.96868878	39.47123068	90.67569793	81.83168879
VE821_2111	74.61212204	14.42987163	56.02122894	55.147408	103.1180045	23.23501845	84.47996346	148.180149	234.6843432	110.3185513	34.91964951	89.06428616	36.63273167	73.29734661	85.615826	34.75518413	38.90693922	44.94127383	39.77322845	73.50208568	14.9622204	32.60811513	123.8145602	15.6875625	38.14510715	42.89811027	18.6977293	40.19872743	48.64150188	25.35311743	115.9012184	69.55714171	119.8816249	54.07737617	7.32058715	83.57887186	61.2707424	34.94142837	76.22268107	45.24179433	64.93644411	46.94513033	53.48435084	110.1146078	35.56609487	206.528638	10.11566481	88.08830491	282.5903517
GSK1904529A_1093	79.10496786	41.0446318	95.64682232	44.35965353	56.04966182	52.93736545	99.80069175	116.017701	122.2074039	78.21561347	51.54927377	110.7822907	52.63403849	99.65172244	101.2109137	53.28523849	55.55591566	67.73814296	104.0028975	94.88179925	60.01225907	97.61765884	95.73153536	87.21583	66.76361118	47.99157037	65.90342094	66.87323416	93.64851385	66.26646158	103.3079924	59.47738702	92.47891939	58.4345945	33.59187838	153.1018624	93.41297487	49.86007654	50.69333436	37.02322438	74.61534345	75.36841068	86.91459251	92.3444474	45.09510253	88.36453636	40.76903938	103.9449824	90.90593376
Niraparib_1177	82.51168371	67.74587674	74.89745717	47.56894597	116.9092662	33.04004067	75.41992618	98.31771906	182.2718796	78.2607091	142.2955781	132.6487998	47.35065497	63.6746677	65.62836226	32.55514169	52.7205992	78.34327923	88.21779117	60.3100879	51.86323918	130.5718808	80.13983987	37.66422979	45.01356658	75.80906603	42.74856854	78.96538531	74.70372911	81.12311122	150.3421715	66.19603101	127.1987929	90.25555617	21.64933028	97.22872496	79.00473915	58.08617641	65.53004775	50.69193502	82.17846933	75.74721838	69.75285763	124.6388567	35.94950728	155.4378768	17.01916425	100.9706568	168.6481865
Selumetinib_1736	83.7688485	28.04637107	74.06167013	21.56019546	159.4961512	21.97815396	75.62786421	56.89636245	97.95246507	36.03973783	359.7579029	46.08799414	43.42779421	35.71438085	36.9276214	36.75515843	135.8060737	74.52386476	19.66785366	40.0378704	78.26902673	64.38515216	26.29234732	29.1698845	40.49602169	154.6056303	42.89789027	52.8554394	33.6438536	56.4371915	131.7970475	42.2064232	328.7011037	143.8572488	65.82464706	82.56744415	65.50348711	82.15557186	72.95817202	35.97614805	51.95537101	121.7240835	105.0419207	177.3639154	38.89056157	167.3261754	46.95638525	142.8140463	167.4951828
Olaparib_1017	84.06111411	30.699223	102.6771736	52.23733989	149.6001083	30.61726998	60.26869623	104.9273454	196.4208236	99.34105873	91.22704311	135.7262674	43.43495621	62.45516603	70.78544441	44.78728814	47.80220202	77.2204899	106.3191485	67.85879835	61.69350367	81.77554375	110.0338992	40.27897762	55.66964982	58.2829522	31.78773827	48.48658987	67.39072983	61.38235331	257.4360103	106.2849453	168.3465302	87.37952349	25.94442035	61.69102384	76.34065934	48.98369047	82.92353499	59.52479263	73.515216	44.26574039	60.23348551	65.06710474	41.04159747	253.5450335	17.1668538	92.32656502	233.440696
XAV939_1268	84.45413631	74.51662017	73.1236146	72.8862498	109.6300238	53.88195537	91.90737384	96.60847473	134.6912686	84.98455114	85.66583377	103.1670337	69.88948902	69.92912494	91.60932978	63.37460117	64.5751641	80.97642938	67.27699034	83.06271542	56.77431805	86.42351798	121.4238656	65.32156801	57.45691276	72.61447334	41.41389688	51.88810924	61.33120954	49.4250971	149.267979	76.19437606	120.2200714	117.4529488	38.14181866	86.46856502	54.34428336	64.36677077	84.63367976	62.7698418	72.24655003	55.52031182	77.69280109	99.41270559	61.72597301	159.437786	29.36876184	105.2449608	132.6932817
I-BRD9_1928	85.76192868	34.02187137	86.64504816	78.4214469	61.20096275	57.3190091	114.0067551	113.9925697	159.2331562	100.9518523	45.47471015	125.3428676	50.96153849	99.09774628	97.87216313	63.403125	50.97328739	80.49119423	125.5333914	83.15105179	32.8780833	73.95878802	123.633644	28.15104123	63.86931394	56.99721209	42.08269927	60.90915646	95.71256689	62.10204442	123.4188012	73.1256901	80.91675342	78.61797625	27.68925183	64.01005314	67.17100407	51.48455962	82.57174967	53.40751326	81.14441784	60.47056246	95.3208026	108.2594419	55.3300429	109.8931198	26.98994376	128.9646797	144.0190538
KU-55933_1030	87.07748657	73.45157888	107.152951	76.29645085	141.215403	51.96571767	87.70936821	129.3812673	103.619255	82.94022741	57.14412639	90.29614839	63.93595123	74.30483315	65.54014747	72.6365257	79.3202785	91.58430893	89.50081424	77.05520348	82.74705225	63.95797776	92.85429607	64.18692976	74.94515565	50.87457851	69.3830748	64.80160339	65.14642338	79.18756129	180.0521708	119.4510588	115.7470577	69.29305554	65.0351033	50.60377323	102.3838346	84.46700677	108.3580321	98.97867339	78.90673096	62.18091331	75.59408791	84.10334886	80.30350703	136.9618017	84.91495497	61.79995526	107.8586355
KRAS (G12C) Inhibitor-12_1855	89.87516981	47.31417033	80.51588227	59.85328216	88.1731549	43.17466766	176.8298648	111.5697419	174.6555771	103.8409416	74.09505547	147.5115269	59.79790811	109.2116847	83.11889439	53.45363378	62.91302507	64.14831146	153.5389246	72.79645381	49.70720474	128.5513259	97.45499403	38.39382562	42.10151318	55.471764	54.28165471	116.6277649	103.933699	68.93412911	107.1403562	65.91704998	100.6975307	109.9220948	21.17729783	112.6241038	70.79883287	39.86191512	67.17206519	53.00126427	69.1642861	66.44415195	143.3970093	114.8265301	35.15051679	95.69407547	33.74770571	94.71770604	147.9464746
ML323_1629	93.39143415	57.64549697	70.70090509	79.42846802	52.10818523	81.31304285	138.7239545	79.90110893	123.4051128	99.72783078	77.44022443	107.6696419	86.26799937	121.8768749	128.7820459	75.12036945	59.86611042	99.68465041	193.1558702	105.7084406	62.67723397	137.7707451	108.844273	68.7886542	74.58965844	83.59105739	61.6694936	95.42211894	142.878785	72.21861996	92.29692712	79.71912115	71.3864766	72.27501053	41.79303874	105.7971526	72.7196739	54.31307274	81.66746504	56.53586625	79.81813559	75.44935179	120.5462789	101.6481803	62.47630569	86.08987361	65.89216933	117.9035176	89.03341192
Doramapimod_1042	96.02271309	135.9423976	109.4255798	65.89392398	51.77561398	108.7863289	93.12805455	94.82124391	102.0759849	78.58265335	79.66500568	69.48891789	78.34912986	82.22560376	71.99541592	76.43813017	168.3193745	104.4420448	270.8463248	74.7798736	78.60623347	77.09178057	79.83224138	103.1938857	82.31184445	58.1116249	112.0532267	131.2654182	156.5525725	170.3139449	128.4527164	86.5677404	83.09089265	84.88380335	101.8414334	62.73758841	100.8302451	88.27560468	106.2683651	103.0679439	99.45034967	116.3896208	96.09121289	115.8827668	90.15516391	79.83945054	113.4363227	53.75422332	81.92854103
P22077_1933	96.87866178	41.63685801	103.6546539	53.87941613	91.28832704	68.94530795	126.1817976	79.0630655	108.67213	139.3950574	64.21038958	134.2127845	55.3642424	132.0615241	123.8652687	79.88822477	58.94812012	76.73146898	257.3106412	113.578317	52.63060155	167.3064448	111.7584996	43.12379243	86.25153262	38.83726683	51.53602262	126.4571878	145.8049388	70.48751727	127.4476062	100.6252062	79.07651327	76.42504734	42.81687467	84.07516702	61.38860589	57.05408186	89.24754544	68.82587177	66.28065117	51.05554502	105.7683511	103.4711197	49.6386881	85.32844167	51.78380158	100.194621	112.8495684
PCI-34051_1621	97.74576373	61.94767332	94.57527168	64.31282442	102.7628806	60.64381075	94.95496081	136.2265165	128.6907522	86.56746662	113.7982196	102.8036095	49.19405366	75.14711572	64.29217377	54.30389688	90.36854486	105.9169402	319.3847742	67.37025917	45.50528299	86.61611793	80.1684848	74.61920105	62.55863953	94.24089719	53.10120365	96.75550921	116.3038278	105.8890285	284.496141	89.19788048	134.2646019	137.0886932	38.77935455	116.8590973	118.2004098	63.63749627	99.71889315	70.35216285	97.77275195	84.18125234	79.28484684	140.0383103	57.37458914	148.0922605	56.21840462	76.1756433	120.8182949
PLX-4720_1036	98.00409285	28.91692931	162.213631	43.49993954	190.2944129	52.04483893	88.38009005	157.7350125	212.4299282	82.89369713	109.57634	86.10259978	36.28315178	72.3196365	80.71030068	51.33415221	150.2646171	119.8718767	126.0564857	101.0945323	92.3709018	84.5469588	107.7860332	34.6700202	61.91902075	63.74044236	52.39594002	49.11080919	70.75034325	60.60293968	208.7370603	76.95877973	320.6745489	133.3472389	32.70933869	64.22143423	78.0633251	53.72620757	125.1610379	50.15889924	115.7801091	55.08856304	90.26016546	148.3531967	40.19921777	255.3696608	68.19879355	190.0629488	190.2792367
Fulvestrant_1816	98.3293099	83.78090088	86.83409617	87.79339559	40.45561183	111.0459318	119.643474	71.13735526	129.7680046	84.79902812	114.7385226	102.5984015	75.08149761	112.807306	125.6618832	72.97170643	84.1665623	101.3159747	176.1069571	94.94035965	68.68608338	139.7017672	107.8269947	114.2225255	72.7304143	125.2263929	86.05344632	95.01582386	153.7455013	83.7525184	80.62625041	71.7734366	77.46974409	96.20812637	59.69921974	179.4924349	93.43120491	57.76248986	84.26873258	63.5569658	104.6383732	130.7061164	104.9152932	163.6948213	63.35409744	89.36114042	33.90306784	141.7055048	96.79280245
BPD-00008900_1998	99.31099868	57.14821457	111.7954415	102.5977339	125.941568	55.8036886	130.3683527	148.0228175	144.4090506	104.5568234	69.5479666	121.4660802	68.41944574	86.99523345	101.0246884	60.13964199	44.89119967	88.39091781	78.4371391	98.7657177	52.07509643	74.4389017	167.2732436	45.05161013	66.84433543	79.57015869	59.65965213	53.71944064	107.8969699	55.57760973	194.9567817	91.31735215	160.5254298	92.845607	37.8946775	107.6513915	81.30535321	59.63228906	91.41326202	64.66771456	87.70666858	58.6840252	86.85850247	157.0190796	65.44497135	170.4116763	28.55743732	134.377782	197.982827
AZD5991_1720	100.5153439	48.05884897	25.01158324	82.67040346	40.10629158	76.27539335	144.4873916	65.80769557	111.6132255	84.74257411	35.02096575	159.1947857	54.24794897	141.6328775	86.88062092	93.69730249	48.57559999	105.1474993	250.0327899	87.03768005	6.354413133	65.52774368	119.8589798	9.413661201	86.30019561	25.74828965	28.11365405	35.71872134	210.7355353	62.78445187	235.4089084	91.94932046	85.60458342	59.99923487	10.75698857	68.86113288	26.5551418	53.81567932	131.5334061	89.53518287	57.90325984	12.0228415	99.21487464	113.7320049	114.322856	65.8914158	10.03827351	155.4689535	74.99775962
GSK591_2110	103.275577	53.64669361	121.1120971	98.43785299	147.6382856	44.65359934	126.1015464	140.3855152	213.0277097	126.739601	84.62609541	171.0407772	54.54919908	102.3366909	96.60932663	85.21713988	62.26815616	80.62898086	75.49303185	99.82259824	58.91854278	116.4249833	123.3817151	52.79574913	60.22373966	69.00293655	55.55464844	93.24214009	119.570783	77.90264243	185.1013895	111.0743346	158.7925861	66.27181643	35.47591068	169.2741556	101.1224724	63.832159	93.82088953	82.41644142	91.84378119	102.8957259	98.06752854	106.6704733	68.2328465	151.2012508	64.10790612	85.41299551	215.2127047
AGI-5198_1913	107.3508635	80.43776	107.5639452	91.39694657	97.58227717	71.71852439	129.7919453	165.3900441	170.5155816	115.604281	83.47922994	124.5059621	67.85140311	117.6040109	107.3941863	90.53976855	82.84233832	107.9068336	141.1105015	119.8737825	86.04271536	98.45711569	119.0070827	65.65583487	106.1444279	66.00268406	75.45799457	95.07149923	117.6705804	72.96590115	183.0429838	119.3048752	120.9218198	104.854594	56.48853962	99.95074152	96.13989391	81.29043041	121.0434646	91.38820275	86.35616494	72.10026817	101.0198468	123.8994291	85.09537519	162.3944729	74.29924638	131.2542992	124.8225038
Ibrutinib_1799	108.1464663	45.51465809	93.89768098	79.04430685	221.807496	33.10405687	137.564602	38.7957947	235.8268387	111.7779734	54.56574015	158.2325114	63.00505504	100.8227565	114.3187294	96.44052332	72.67146436	123.8045116	70.58046851	89.73053853	19.96983291	79.52439638	192.3905714	53.29245694	66.82822492	40.74324414	61.31929035	56.49905376	87.45659422	64.00756778	413.3002048	84.55019376	237.0852648	106.2523642	28.36859327	47.73848737	12.80069327	55.94902339	109.4165394	90.8579099	52.14723158	32.61810897	91.34356992	49.33769226	74.60111829	208.0183458	12.31915317	99.65063314	214.4443514
PRIMA-1MET_1131	110.3201626	261.1223063	169.6695816	55.28107907	69.75044799	130.8725331	111.889044	137.9045701	119.2094123	82.25365181	184.1881125	121.560716	62.30532332	83.52956339	103.2070589	48.6538578	240.1047043	72.74211364	576.3588722	104.6912227	172.4685689	262.0714392	120.2244768	87.02570813	77.83418984	131.3188873	60.14439946	186.6978287	156.6782114	107.1279027	64.62902227	81.27438615	155.1859673	117.3936444	41.95190562	184.6916363	46.28608835	49.35439185	65.28145027	53.7545484	117.6499859	241.2102367	87.81707134	391.198789	56.1062332	80.05507662	76.97391304	134.5400471	110.0559835
Dabrafenib_1373	111.8679957	53.68057593	130.4119095	58.99680318	137.7698241	39.16596711	107.3319608	128.8062955	222.4025038	143.3319611	243.9733352	109.0445515	62.59645997	100.0530247	99.53759518	59.50909804	137.6598914	70.60480449	73.16576622	100.4982482	72.81100249	155.324502	85.25031354	57.21136718	75.94959382	88.40162554	73.96613911	118.3732672	102.7705717	79.29756761	172.4980014	98.85527729	271.4862136	128.7460987	25.89206686	136.7784635	91.89367379	58.1540672	156.2050251	56.84049316	164.5264818	91.27818051	104.440107	134.8234116	38.42045186	276.4061479	59.58074739	241.7813768	172.0343094
MN-64_1854	119.372872	72.75527615	101.8346697	98.37114256	119.5453004	101.8334381	170.9666326	109.9844532	154.3329402	109.3324419	99.80977881	178.21375	60.86796349	116.7555104	119.0552781	94.79009589	154.4590208	148.4180178	207.417539	99.93609291	50.76077807	136.9195524	159.117326	64.16362642	94.24988613	73.20670091	66.76786274	79.5264347	183.7943351	100.1002651	288.389636	127.681115	130.2004628	146.2706682	61.22213624	123.8676571	70.63252271	90.02358602	133.1462594	109.7495138	102.8623221	57.9947941	169.8070402	153.574447	94.24248959	151.9465609	36.08043958	125.7661412	167.2580118
RVX-208_1625	121.3753671	76.8439328	127.261547	118.6150312	137.6923286	86.13421001	121.5423022	151.5377979	144.5573635	126.0810622	127.0512228	144.3655465	72.28968432	113.4607126	113.5428776	91.48307172	102.5005219	150.8465794	181.0964695	103.2216387	66.11887883	94.62441721	138.4295018	56.97282814	77.01985774	87.47999409	64.37306203	84.74752734	139.0923362	120.9125137	321.1754756	161.2487755	167.7594633	95.06165225	49.68846862	114.3860117	95.4221298	98.63350334	150.3112504	115.4866952	99.09902319	84.62757462	109.4137583	133.0586378	92.69969938	164.9040734	66.84657407	132.5761458	177.7084712
Mirin_1048	131.7206403	51.52152459	110.1537166	74.76270219	137.900987	55.01459833	183.1703496	246.7753086	243.8885119	131.7095377	202.1737649	108.6330659	96.15006578	101.1912481	114.5502952	70.89109521	72.60056986	132.4788393	108.4570063	169.7799741	108.6254671	98.2192993	201.4112762	68.62895625	88.08667716	125.4747177	65.02710064	55.82974557	57.97311955	54.21719838	159.9127984	86.58114758	265.7436944	210.0519856	36.92370905	185.6117455	84.20519273	95.21517155	106.7037845	58.69873619	125.4396752	71.04127215	130.1980297	260.3980951	76.11584074	216.3212844	33.03321719	382.9416499	199.5085655
Ruxolitinib_1507	133.3832259	128.759829	94.75633203	113.6130457	126.1650957	107.2875607	176.661342	150.4660704	178.999376	130.3676261	118.3640011	159.7116329	79.88914878	128.9498657	118.4597349	95.76825059	92.22237564	137.4917952	183.3838321	86.05731745	72.11630907	170.5609971	180.7717974	80.96563841	78.38721585	93.51780281	80.30369738	130.3890503	183.3455864	145.7251056	371.4387495	123.2724656	203.6594931	141.396622	65.08843654	149.9207231	95.37545202	76.95403704	147.2809386	101.9790968	114.5046738	82.25147367	125.0236835	176.1608055	82.41744797	207.4116831	49.75102039	89.06269105	188.2626404
OSI-027_1594	136.0159322	102.0641131	47.79894999	134.0969624	135.8909062	144.663057	189.4217585	61.60011758	240.5791159	155.6944708	105.4145402	122.3294593	167.592014	195.2944208	334.0484573	148.9986008	126.1898795	105.622767	167.0993253	211.4268999	86.13610471	106.2778115	198.5899302	112.546897	109.650073	122.906004	87.99282792	81.28538739	99.02138923	36.88801936	119.3214557	110.9026959	194.1413574	95.05562143	60.1731339	123.8272276	38.00066025	46.33706026	129.2576087	97.22250427	40.16069941	122.7495377	108.2404481	61.55233956	103.342437	195.9956942	46.49508573	193.8897693	108.723548
Nutlin-3a (-)_1047	137.5153628	377.3572589	212.7114874	52.82076052	389.5364841	55.20789514	76.60664157	252.1522859	209.1094643	71.96246967	381.9692826	78.0144007	76.29168464	30.92171388	69.09793544	25.4666459	320.8266222	41.45064757	247.9373443	74.44620765	343.7136107	140.6891272	141.8504569	100.965944	66.02985118	167.767018	52.04502284	98.76631362	184.3772781	124.0396256	319.9815929	51.02856278	356.6152198	243.8900524	90.71683039	194.0867531	61.81961591	96.62075922	64.4267077	44.81431365	167.3547837	211.4803114	93.06721795	164.0137952	33.20193614	490.5716237	30.8538774	211.3279734	293.8493464
GSK2578215A_1927	140.6115047	76.00581334	139.0629885	145.7650797	129.2288279	100.5329179	171.9594373	182.9526394	224.9847547	150.74436	78.69953619	189.3714549	98.49038106	150.639767	168.7251885	121.0493402	99.38609721	135.8649806	130.695778	146.3786902	73.5056794	151.3774707	184.1780515	70.706354	128.7395138	104.1954825	83.18851151	127.2353421	177.1711518	74.9540978	205.0851708	167.2614363	188.7205733	138.4285445	71.11329122	136.7535418	117.2575597	88.36462267	173.2564132	125.1825037	121.4847134	82.29012054	159.2644501	145.6548791	107.9659626	175.7483302	70.06369131	199.5723897	191.4637529
AMG-319_2045	142.8078068	87.6991258	213.3352629	93.11154972	161.5622829	84.98954362	195.6367537	261.1799936	253.8516917	158.6100766	103.5632524	160.0513098	61.38398975	132.1193456	135.6504099	97.7283542	152.0015969	147.4304424	287.7997741	122.11909	120.6421892	138.0971865	203.5228072	47.69204701	93.61842192	52.87358544	47.14722755	99.04351245	150.0218284	90.27095936	258.5481332	157.7731337	293.9632508	109.6888991	42.83390645	78.09721206	116.5513476	75.45392489	164.8279505	120.7808649	123.4201638	79.08672676	180.6577672	145.1749433	99.70957803	254.0611307	50.90125933	111.254315	295.2208639
GDC0810_1925	143.2098939	83.8172759	141.6652793	146.5736181	133.0788197	84.40241983	154.0817569	126.8452336	222.5828065	173.5155404	112.6484818	184.0076951	105.304298	152.3022714	181.222797	137.5147792	118.4936195	103.7118049	150.8066395	164.8135589	76.18711983	153.7176761	206.1421685	95.75213951	130.2386275	105.9174779	80.68038873	160.2685396	141.2427752	86.36564237	189.3216688	152.3678457	109.9725653	119.3101711	62.10203335	185.9224858	132.7939284	93.2726965	115.7724899	107.751618	93.68906968	109.7800198	115.8913982	116.1264457	95.08795635	181.2342858	93.2418904	197.5370967	176.8603222
IRAK4_4710_1716	146.6837537	79.2386204	143.1219236	155.8791438	134.3043815	98.33824857	188.9021436	183.2743831	248.3366976	146.949032	114.8166065	201.1380032	105.3011735	172.9544563	164.1878968	111.4993289	69.38726638	171.7853793	104.0108379	156.9519728	75.69095996	131.7213393	213.022457	80.70962183	124.1820481	151.215501	78.7420023	110.0130376	124.9746339	112.3634051	242.3796174	166.382269	169.0675154	162.5986543	61.76002024	138.6990466	133.0083319	110.8492668	176.4220026	122.0911515	114.901823	64.58565114	180.5093675	197.0726823	100.8077021	209.0471922	57.70518583	220.1249759	173.8271726
LCL161_1557	146.7065379	106.7126751	122.9204332	92.95699678	173.5476501	96.02335372	180.5350505	88.79294183	175.8962783	131.2700657	154.931336	178.6608989	88.24983791	168.4684214	158.4953543	133.1599183	112.9412789	144.5414366	339.3654962	104.5052952	65.58641463	205.7013324	151.8236297	77.54517342	113.3616467	51.9453492	126.5140761	151.0111149	193.4056806	150.7820271	444.8580974	167.8912536	223.9333217	129.595964	77.6920549	218.8530312	87.3749582	81.51144858	148.2815904	147.5483857	126.6589983	127.8413059	97.66292584	136.2912451	95.57036866	206.2847284	69.1889189	51.35660015	127.4565774
BIBR-1532_2043	149.5430648	80.03779447	140.9516104	109.7125663	112.5390216	105.0640378	198.0340828	155.2938075	244.3578821	199.5573768	126.7371172	175.3217093	94.90497924	154.1495795	159.6545545	108.9094674	140.2460304	172.8359677	297.8218142	125.3239254	69.74024792	156.2434569	159.0972665	97.1120349	111.5335161	84.41287391	93.16292456	134.5817267	207.9037731	138.8507804	329.8654038	125.5093452	221.9217175	136.7865173	71.68879009	101.6733534	126.6121582	92.34123153	151.9079729	95.45934043	134.6437339	100.5114866	148.4394661	132.238458	110.2915211	267.2508796	61.02033869	147.9297396	215.6822402
Leflunomide_1578	155.3374462	107.8830583	152.4189667	120.3691747	142.0706179	93.91056287	191.913552	181.3866538	232.490202	202.7930478	126.6609421	222.3415428	164.8885019	185.8003376	185.4577036	102.8489098	107.0514092	134.5250179	174.842043	180.5806722	92.10259949	193.6581333	193.8533446	119.9070493	106.7905284	182.0671876	87.40094875	136.0004713	129.5910399	113.0110363	160.6822287	145.8767667	189.9966026	144.2250829	43.78952981	207.5489922	119.0312151	110.6123106	149.6408372	109.2376425	164.7251901	159.7254202	182.9095433	182.9528217	87.9838185	236.5167995	85.32284201	189.5523438	208.5411066
5-Fluorouracil_1073	160.3684083	73.98313868	98.52594876	103.1733612	216.5168336	29.51088626	279.3756222	206.286052	363.6887523	147.4622469	177.9341191	236.080176	104.9046417	119.4978055	207.9778727	51.33600222	59.44792902	40.57980444	47.22668461	90.26311493	227.1910457	193.0923614	171.3719703	43.59222742	59.05325693	119.5537042	29.79067597	99.80463014	94.01695074	29.30718722	82.73173072	143.3061941	362.3830501	103.2214167	11.27014261	667.6760137	59.05194343	41.63242228	89.28665344	48.46243292	83.88779723	283.0310487	179.3513988	273.8055942	32.10136071	209.1321258	8.05585023	416.066583	888.5117747
CZC24832_1615	166.3152352	124.4321159	186.4901818	129.1564884	218.8037245	105.6831336	195.5041989	175.1682952	233.9304147	173.0967539	153.4454868	174.1864212	112.4045366	147.5983582	163.0690802	117.8045241	163.5560378	183.1524842	263.8636345	158.8966448	90.15365705	144.6011145	235.9183637	84.01110306	135.9823384	98.02257801	93.70093841	142.1393548	201.8223438	126.5153479	312.1580776	205.5423848	284.1967975	143.6799933	72.8429889	149.8099905	117.0306339	105.201778	199.6231439	157.0388159	181.0785619	106.1827528	188.2305944	217.886765	126.7514546	233.466822	73.31956494	162.3197564	273.8892131
Acetalax_1804	167.2244023	322.1379529	32.80052957	60.20513783	69.90682655	331.843156	249.7896743	121.1359856	186.5410346	135.5949182	38.46480217	162.2639558	96.06309632	179.7127388	336.5669853	186.8533127	408.6657715	94.38155564	303.9131009	174.9421442	201.614403	481.0229811	100.3329057	433.6168333	191.0351286	148.9766953	142.4995657	38.68390385	106.1788479	95.82821741	166.6702607	70.88565648	96.66472866	130.8815553	173.546564	69.28071831	42.92122453	74.63424522	102.225876	68.22703754	15.14630141	158.7499347	105.1382277	96.72139674	125.4471482	112.5849993	72.32731813	273.321718	140.7882456
Fludarabine_1813	172.4210636	81.28371656	236.4075853	126.6861233	278.4979879	62.1238058	279.141012	229.6438434	439.4704693	178.6854057	99.77620698	251.8369712	66.75606354	145.8168715	154.8644746	82.21988908	133.2104385	215.6709738	286.321653	120.4140629	71.51812324	178.5654754	159.6560003	38.71752251	102.3304562	150.9784198	50.45280271	162.4869747	140.6992571	117.3686398	324.3837165	204.7419126	197.8823068	196.071864	43.76464969	106.595547	128.804714	82.65729912	235.0629918	116.6598759	96.80615002	108.4391075	155.5395608	210.2366898	82.79676986	388.6350868	77.37579493	205.7005332	292.3834282
Oxaliplatin_1806	172.7917733	90.37121354	155.0309456	74.51158528	284.9988807	98.41287672	220.7098128	207.5103493	402.1281476	187.9477698	469.0554286	251.8254647	106.4782375	130.2634504	164.8432513	80.25281543	104.6112023	155.9372373	140.276139	131.9124731	162.8900285	291.2552607	87.29856457	140.0374072	80.02047262	293.2803723	71.58269837	126.7274043	183.0377811	99.22756842	260.7843801	119.0488668	624.3962692	288.3533925	29.53782256	340.5330505	157.1984311	97.30517427	112.6233858	82.39412037	128.3976462	146.6501421	177.3842848	386.6093191	55.38761724	351.9250034	46.05354813	255.3780907	281.0700013
LJI308_2107	174.2916783	90.38674179	190.1457841	157.5318585	253.9563532	97.76564018	190.9376944	314.1180642	312.3898017	222.4014012	125.338775	193.6089118	83.63412427	144.0316148	142.1390097	106.7268763	171.8799417	140.8580744	185.6069049	171.8548741	67.70048522	149.6275339	183.1218094	74.92808221	126.446356	113.2430224	80.475784	176.9884799	163.5242288	116.8190031	325.0767941	189.9460402	254.0303985	174.6299581	72.25369976	128.6239476	153.3018381	141.4338349	218.2830443	135.0753266	152.1515434	105.6270704	185.3182151	184.4992844	137.5380268	374.4115686	76.32615266	223.9172418	406.1134105
Picolinici-acid_1635	174.6294182	161.0022493	157.5277494	137.6329685	212.3111873	129.0063097	187.2602474	209.6176418	246.6563456	175.5014128	210.8258473	190.1831477	112.462923	168.3965617	161.9770364	123.787065	187.6206069	159.5450597	175.2678473	154.142705	104.7268426	187.5641441	220.1058247	124.5190733	149.7120956	150.4327782	111.9788491	182.9806247	239.2807936	193.5062558	310.8307241	202.2194164	236.478211	152.1076233	89.75209051	192.1425589	131.3678831	109.3883347	183.5598308	143.0211719	175.0794963	141.3957517	167.4103314	211.7943171	139.2592285	194.0238728	108.9106017	158.9698707	210.6894516
Cyclophosphamide_1512	182.7723078	97.86649575	211.5962687	166.3022826	167.2241289	107.8230208	209.2449077	224.4077453	285.3758337	223.820435	110.8763696	222.4704006	120.3211464	183.9169062	189.0183133	133.2007371	142.3154723	166.5758001	281.9905976	166.7687076	111.8085476	168.3581957	247.5257276	90.29499085	164.6007485	84.99026918	103.9307423	153.4788673	236.6596972	140.6649171	354.6222024	181.7384101	182.7960493	144.8364236	96.5981291	144.9193042	147.1606514	125.989543	196.0378273	148.4273291	176.3518734	145.6135661	202.3279009	173.4049192	119.2226999	258.6864047	91.09967734	202.3215645	267.5320276
LY2109761_1852	184.5508634	127.7794711	230.8721707	126.7830208	145.6010145	169.780905	253.9201075	210.3264728	232.8866506	183.7093556	134.9927786	194.7402559	114.1158875	159.695816	137.0416878	113.8376116	199.0422963	238.9462871	450.0500591	123.0968179	82.25780329	152.1811351	193.6475253	124.8047359	146.4708939	105.5000126	148.6371049	179.0613593	230.4966799	206.3842667	551.3799551	169.2034205	194.3459315	218.5463629	118.3060227	115.5061181	202.9596631	113.7922006	193.1151166	141.4427824	208.8448841	85.98452369	256.8795959	337.9592473	131.0521019	179.1543551	65.33931181	219.82494	177.9113707
EPZ004777_1237	186.6302657	105.0462699	163.6367081	102.8834694	227.1408874	107.7547469	200.6663491	206.5970997	396.3258786	228.4087708	122.3552423	198.0225249	102.4373689	161.075509	176.4106362	120.0483768	160.9223795	206.1631974	395.6722924	181.2654415	84.73306463	158.8495128	198.5032856	66.80109189	142.8392237	83.60618734	99.75420044	115.2311378	270.8200219	125.3128757	461.1808644	163.3407427	337.2278627	164.7876301	81.33769583	178.1135044	130.0860787	118.9669636	207.0908447	132.4000753	175.9142603	107.5936635	205.9814351	233.3608351	137.0408036	304.5731032	69.06467837	192.9505721	338.5886009
IAP_5620_1428	189.5923494	194.436825	144.9292786	126.3184457	314.7354132	97.67341464	285.1090311	120.8703653	260.8329556	160.1679422	104.4990036	308.7954132	75.84265677	201.208242	158.7403503	171.1739362	71.40506552	116.2051999	644.5431098	121.027164	52.46307737	274.0570381	215.1211425	45.81070773	125.6479352	99.60035763	116.7338792	137.5011405	173.6119604	70.69256177	940.2798491	216.8512272	309.2615079	185.80529	109.9803529	154.3542693	170.9925817	77.06402367	204.4503466	174.499044	122.4919774	47.05224669	186.7100096	289.5907815	121.8964576	359.5402529	57.04806508	82.50772329	186.3410663
PFI3_1620	197.1924117	132.8289428	177.5827687	160.3672745	206.3378732	147.3672367	241.8479063	217.3052323	246.635854	216.1274424	153.5147586	219.3765677	138.3909468	186.4484004	177.0634737	151.5487761	142.9335296	235.1393335	333.7028457	177.3287252	106.333203	178.539978	239.9800881	103.0298554	172.4048555	133.6534966	127.0747854	191.7451033	229.214239	190.2420064	367.9896619	245.0017641	291.9576102	170.4894862	83.94820967	169.094716	169.0693395	132.5321634	233.9922714	186.0151526	194.4780323	106.5133099	194.306338	241.1286862	170.1324683	246.6723251	114.1717574	196.1992928	234.2253728
SB216763_1025	200.1810625	204.1585071	274.0037127	149.1483393	321.7490473	80.18047923	177.7335425	308.3128994	208.6034848	150.2121155	79.91899772	189.6994244	124.4142392	127.1649312	114.7392516	103.1166195	218.7584663	148.5053757	329.0507512	100.0323523	121.2326507	134.4620463	174.0157755	143.3478763	132.6967329	86.73417284	128.4645025	240.5220112	178.575018	275.0786174	607.0574631	285.8945649	326.0742155	139.8665431	98.49603225	86.5616134	192.1295516	169.2914684	203.4639149	182.5159591	211.7653404	142.2123063	151.3857883	227.0401381	122.8793553	371.4711985	149.4914483	82.32566281	355.4312578
AZD1208_1449	210.4011759	159.4603174	225.4286862	156.7012261	167.2027021	214.0048679	275.2286065	216.1341039	295.7950246	187.3695921	162.0234381	202.0882078	134.6512595	207.8610935	167.6510993	136.3717374	199.7167908	296.1213401	377.5124167	170.8134664	99.96557434	203.755617	222.098374	95.35881148	172.7581525	142.3460355	134.7885571	195.4505786	331.1795546	240.2571876	439.5058831	199.1030668	277.9391718	265.7272246	152.7914995	150.9256416	191.0809734	159.7919261	261.3891188	200.3057461	236.5127928	105.1664207	360.9223522	377.6906759	174.2673695	233.7367693	63.25537576	345.3116145	258.7076982
MIRA-1_1931	248.8958991	134.8646115	274.8937028	199.1312864	184.012827	169.6107644	342.5031503	279.2049037	376.2753673	303.1798345	153.5427015	293.1862403	140.6753699	236.3047094	291.6048582	184.6028423	178.8920062	217.3515272	508.5709064	249.4507885	113.766729	239.446051	318.1634546	95.89311022	185.9986431	127.9095586	120.243144	204.5008529	375.0053509	169.2129941	492.9327688	187.5527903	286.8446294	193.4897629	102.7063444	223.5334376	149.2583026	133.7006932	267.865515	169.5569425	222.6810284	185.0526175	312.2158342	266.5401922	136.5516095	357.1871176	56.05484822	299.2492601	428.4180328
EPZ5676_1563	274.2462724	176.2511979	236.009498	184.6763072	417.0367348	186.9394062	323.6268803	267.6133618	357.9611502	364.1222634	262.440314	288.5401079	147.3397074	261.1756073	260.8680828	189.8125813	193.246715	305.7581574	489.389471	208.495241	117.9842969	381.0251356	292.364867	107.0900342	206.8336613	112.0653673	156.7770469	236.2807752	412.7042742	316.88309	750.8918999	288.2482492	518.8037942	195.0812096	125.3119393	224.1091948	165.1346542	176.431249	348.5867777	222.6334142	263.5083207	147.9058383	246.4657908	264.0704434	185.3712032	429.8816289	111.21369	251.9940247	404.8280538
Nelarabine_1814	440.9075997	345.5836077	541.3342037	320.2640042	564.2837805	270.2998413	474.1306122	324.2633818	688.9293404	355.3318564	369.8311642	480.7730294	251.9132534	363.1170728	348.5702194	286.1082833	379.3345152	618.4944079	784.4708983	338.7585332	185.5878374	481.1243285	546.6097314	248.4412316	329.3985447	308.9157463	256.1261707	294.4930742	775.9151557	564.8879759	1010.185455	424.1782098	654.1110397	415.9295979	265.727031	437.3567077	318.4856822	272.4310955	527.9204147	395.1242473	484.8451525	257.2045217	467.5399422	558.7475185	326.2542053	633.5538909	72.18504423	401.4936041	568.0829361
Temozolomide_1375	443.2597702	237.6837518	357.4542204	339.0220191	394.0970432	157.0619008	515.7888367	750.3712116	711.067635	541.3254136	270.1873258	520.662493	251.3388938	373.6818728	409.092303	241.451478	320.7563759	289.7840895	448.2150839	373.4203178	415.7335848	646.933118	639.2619983	123.0366511	325.2409083	212.2699389	224.5413259	378.4904163	388.0169234	342.9578653	885.6551939	498.6765677	520.8568467	357.8045985	136.6756795	315.0823277	405.3206593	304.2266103	547.0075647	291.710933	440.8209523	282.4737531	493.1915269	609.8536808	211.2861299	982.8268177	77.38907371	532.7307911	881.4146235
Carmustine_1807	477.4689542	285.0395121	441.6961418	435.7101079	514.8129571	371.9839014	575.8833647	371.1686315	584.8033423	426.6879528	364.6443393	590.9760742	280.5640544	520.8966959	451.0589784	333.2141411	231.4156848	689.8949395	885.5473812	415.9052148	207.5136012	491.1442939	488.0020666	286.3180345	390.6741974	395.0962533	354.4900524	423.3856579	796.8404684	461.7932739	1065.504301	439.2388596	590.6326745	571.8740865	249.0012283	450.6091701	358.9863981	301.6701848	475.9887532	399.1664073	474.502853	352.6035515	519.5464066	616.9609405	333.1791565	497.5742177	138.1460938	475.3782764	475.3891617
[truncated: 560 more columns]
